# Supplementary material for: Air- and water-stable Lewis acids: synthesis and reactivity of P-trifluoromethyl electrophilic phosphonium cations
Source: Royal Society of Chemistry journal article supplement (doi:10.1039/c7cc09128a), 2017-12-21
Supplement: c7cc09128a1.pdf [file c7cc09128a1.pdf]

## Supporting Information for:

### Air- and water-stable Lewis acids: synthesis and reactivity of *P*-trifluoromethyl electrophilic phosphonium cations

*V. Fasano, J. H. W. LaFortune, J. M. Bayne, M. J. Ingleson\* and D. W. Stephan\**

\* *michael.ingleson@manchester.ac.uk*

*School of Chemistry, University of Manchester, M139PL, U.K.*

\* *dstephan@chem.utoronto.ca*

*Department of Chemistry, University of Toronto, M5S3H6, Canada*

## Table of Contents

|                                                               |     |
|---------------------------------------------------------------|-----|
| 1. General Remarks                                            | S2  |
| 2. Attempted trifluoromethylations of phosphines              | S3  |
| 2.1 Electrophilic / radical trifluoromethylation              | S3  |
| 2.2 Nucleophilic trifluoromethylation                         | S4  |
| 3. Catalyst synthesis                                         | S7  |
| 3.1 Synthesis of Ph <sub>2</sub> PCF <sub>3</sub>             | S7  |
| 3.2 Synthesis of [1][OTf]                                     | S7  |
| 3.3 Synthesis of [1][BArF]                                    | S10 |
| 3.4 Synthesis of [2][OTf]                                     | S13 |
| 4. Stability tests                                            | S16 |
| 4.1 Water addition                                            | S16 |
| 4.2 Phenol addition                                           | S17 |
| 4.3 Phenol/PhNH <sub>2</sub> addition                         | S18 |
| 4.4 Water/PhNH <sub>2</sub> addition                          | S19 |
| 4.5 HCl addition                                              | S21 |
| 5. Hydride ion affinity calculations                          | S22 |
| 6. Hydrodefluorination reactions                              | S29 |
| 7. Dehydrosilylation of alcohols                              | S33 |
| 8. C=O reductions                                             | S37 |
| 9. Imine reductions                                           | S46 |
| 10. H/D silane-scrambling                                     | S48 |
| 11. Mukaiyama aldol reactions                                 | S49 |
| 12. Crystallographic details of [1][OTf], [1][BArF], [2][OTf] | S50 |
| 13. References                                                | S52 |

## 1. General Remarks

Unless otherwise indicated all manipulations were conducted under inert nitrogen atmosphere. 5-(Trifluoromethyl)dibenzothiophenium trifluoromethanesulfonate (Umemoto's reagent), 1-Trifluoromethyl-1,2-benziodoxol-3-(1H)-one (Togni's reagent), sodium triflate (Langlois reagent),  $\text{Ph}_3\text{P}$ ,  $\text{Ph}_2\text{POPh}$ ,  $\text{TMSCF}_3$ ,  $\text{CsF}$  and all the reagents for the catalysis screening were purchased from commercial sources and used as received unless otherwise stated. Tris(pentafluorophenyl)fluorophosphonium tetrakis(pentafluorophenyl)borate  $[(\text{C}_6\text{F}_5)_3\text{PF}][\text{BArF}]$ ,<sup>1</sup> triphenylphosphonium anhydride trifluoromethane sulfonate (Hendrickson reagent)<sup>2</sup> and  $[\text{K}][\text{BArF}]$ <sup>3</sup> were synthesized in accordance with the literature. Dichloromethane,  $d_2$ -dichloromethane,  $d$ -chloroform were dried over  $\text{CaH}_2$  and distilled and degassed before use. Solvents for column chromatography were of technical grade and used without further purification. Column chromatography was performed on silica gel (230-400 mesh). NMR spectra were recorded with a Bruker AV-400 spectrometer (400 MHz  $^1\text{H}$ ; 100 MHz  $^{13}\text{C}$ ; 128 MHz  $^{11}\text{B}$ ; 376 MHz  $^{19}\text{F}$ ; 79 MHz  $^{29}\text{Si}$ , 162 MHz  $^{31}\text{P}$ ).  $^1\text{H}$  NMR chemical shifts are reported in ppm relative to *protio* impurities in the deuterated solvents and  $^{13}\text{C}$  NMR chemical shifts using the solvent resonances unless otherwise stated.  $^{11}\text{B}$  NMR spectra were referenced to external  $\text{BF}_3\cdot\text{Et}_2\text{O}$ ,  $^{19}\text{F}$  to  $\text{Cl}_3\text{CF}$ ,  $^{29}\text{Si}$  to  $\text{Si}(\text{CH}_3)_4$  and  $^{31}\text{P}$  to 85%  $\text{H}_3\text{PO}_4$ .) Coupling constants  $J$  are given in Hertz (Hz), while the multiplicity of the signals are indicated as "s", "d", "t", "q", "pent", "sept" or "m" for singlet, doublet, triplet, quartet, pentet, septet or multiplet, respectively. Mass spectra were recorded on a Waters QTOF mass spectrometer.

## 2. Attempted trifluoromethylations of phosphines

### 2.1 Electrophilic / radical trifluoromethylation

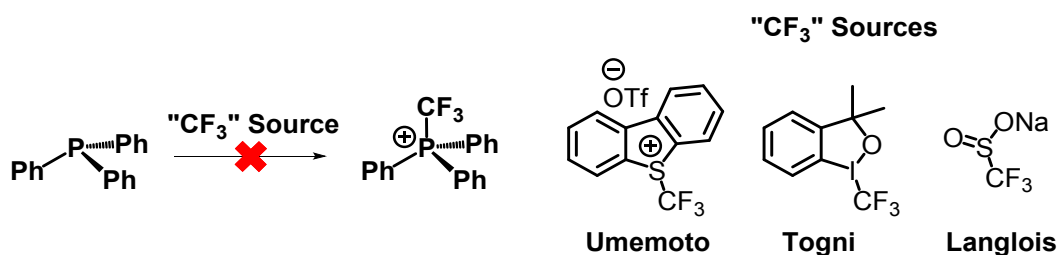

**Umemoto's:** the use of Umemoto's reagent was found to be unsuccessful under a range of conditions (this is consistent with already reported by Umemoto and co-workers).<sup>4</sup>

**Togni's:** under inert atmosphere, in a J. Youngs NMR tube, Ph<sub>3</sub>P (15 mg, 0.06 mmol, 1.5 eq.) was dissolved in anhydrous DCM (0.5 mL), followed by the addition of 3,3-dimethyl-1-(trifluoromethyl)-1,2-benziodoxole (13 mg, 0.04 mmol, 1.0 eq.). After heating the reaction mixture at 60°C for 18 hours, no significant reactivity was observed.

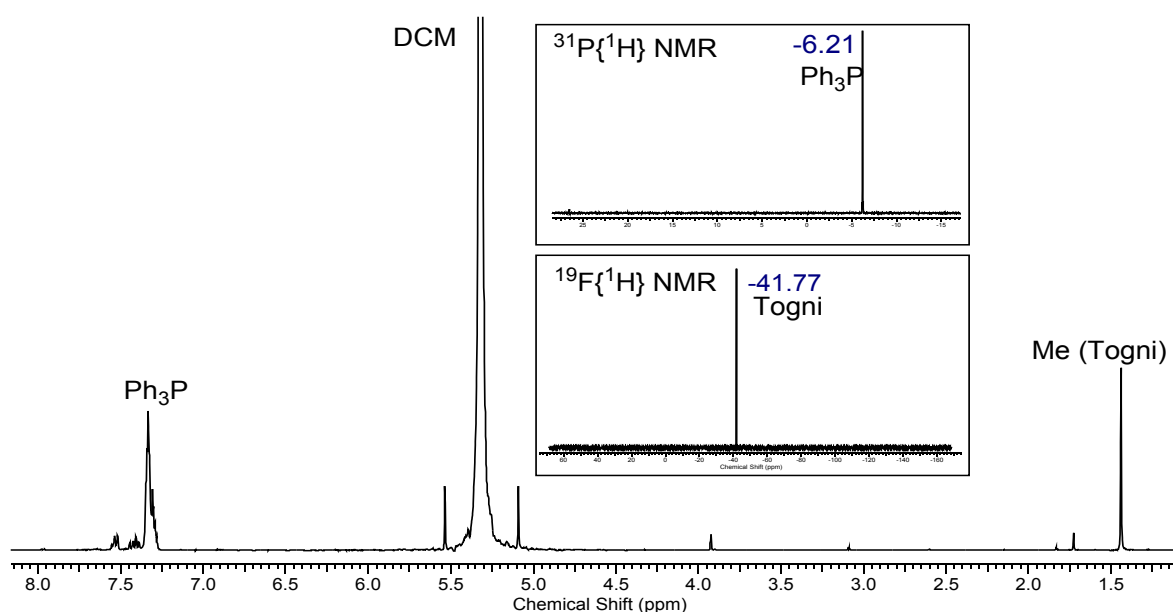

**Figure S1.** *In situ* <sup>1</sup>H, <sup>31</sup>P{<sup>1</sup>H} and <sup>19</sup>F{<sup>1</sup>H}-NMR spectra of the reaction between Ph<sub>3</sub>P and Togni's reagent in anhydrous DCM after 18 h at 60°C.

**Langlois's:** under inert atmosphere, in a J. Youngs NMR tube, Ph<sub>3</sub>P (10 mg, 0.04 mmol, 1.0 eq.), sodium triflate (19 mg, 0.12 mmol, 3.0 eq.) and CuCl (4 mg, 0.04 mmol, 1.0 eq.) were dissolved in anhydrous DCM (0.5 mL), followed by the addition of a 5.5 M solution of tert-butyl hydroperoxide in nonane (35 μL, 0.20 mmol, 5.0 eq.). After heating the reaction mixture at 60°C for 1 hours, although some CuCF<sub>3</sub> was observed (thus suggesting CF<sub>3</sub> radical formation), Ph<sub>3</sub>P was oxidized to Ph<sub>3</sub>PO.

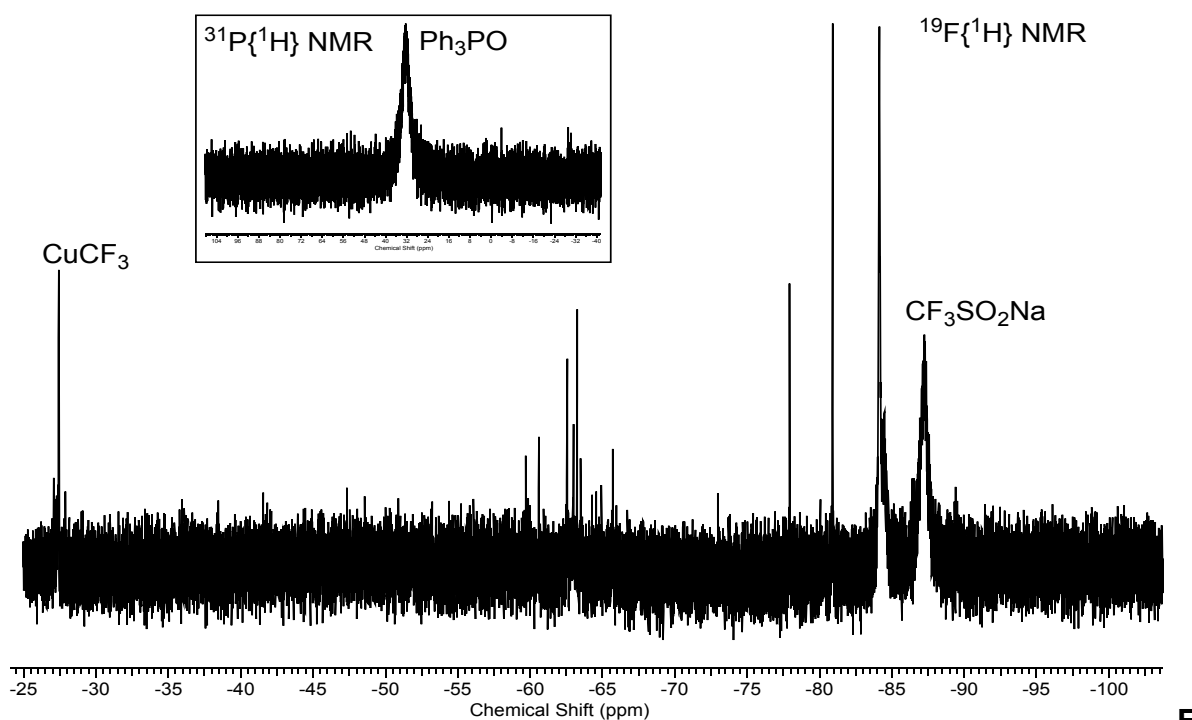

**Figure S2.** *In situ*  $^{31}\text{P}\{^1\text{H}\}$  and  $^{19}\text{F}\{^1\text{H}\}$ -NMR spectra of the reaction with  $\text{Ph}_3\text{P}$ ,  $\text{CF}_3\text{SO}_2\text{Na}$ ,  $\text{CuCl}$  and TBHP in anhydrous DCM after 1 h at  $60^\circ\text{C}$ .

## 2.2 Nucleophilic trifluoromethylation

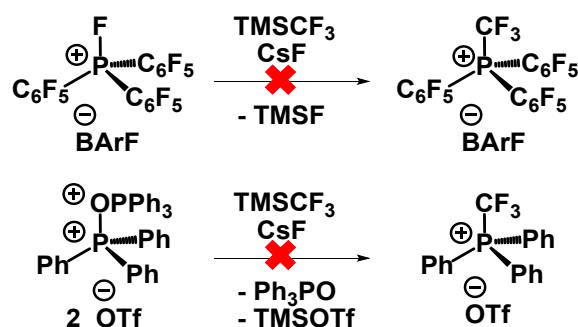

**$[(\text{C}_6\text{F}_5)_3\text{PF}][\text{BARf}]$ :** Under inert atmosphere, in a J. Youngs NMR tube,  $[(\text{C}_6\text{F}_5)_3\text{PF}][\text{BARf}]$  (49 mg, 0.04 mmol, 1.0 eq.) was dissolved in anhydrous DCM (0.5 mL), followed by the addition of  $\text{TMSCF}_3$  (9  $\mu\text{L}$ , 0.06 mmol, 1.5 eq.) and  $\text{CsF}$  (3 mg, 0.02 mmol, 0.5 eq.). After inverting the reaction mixture at R.T. for 18 hours,  $(\text{C}_6\text{F}_5)_3\text{PF}_2$  was observed; the high fluorophilicity of the starting phosphonium sequestered the fluoride preventing  $\text{TMSCF}_3$  activation, while in absence of  $\text{CsF}$  no reaction was observed at R.T.). Diagnostic peaks:  $^{31}\text{P}\{^1\text{H}\}$  NMR  $\delta = -48.1$  ppm (t,  $^1J_{\text{P-F}} = 695$  Hz) and  $^{19}\text{F}\{^1\text{H}\}$  NMR  $\delta = 1.60$  ppm (d,  $^1J_{\text{P-F}} = 695$  Hz), in accordance with those reported in the literature.<sup>1</sup>

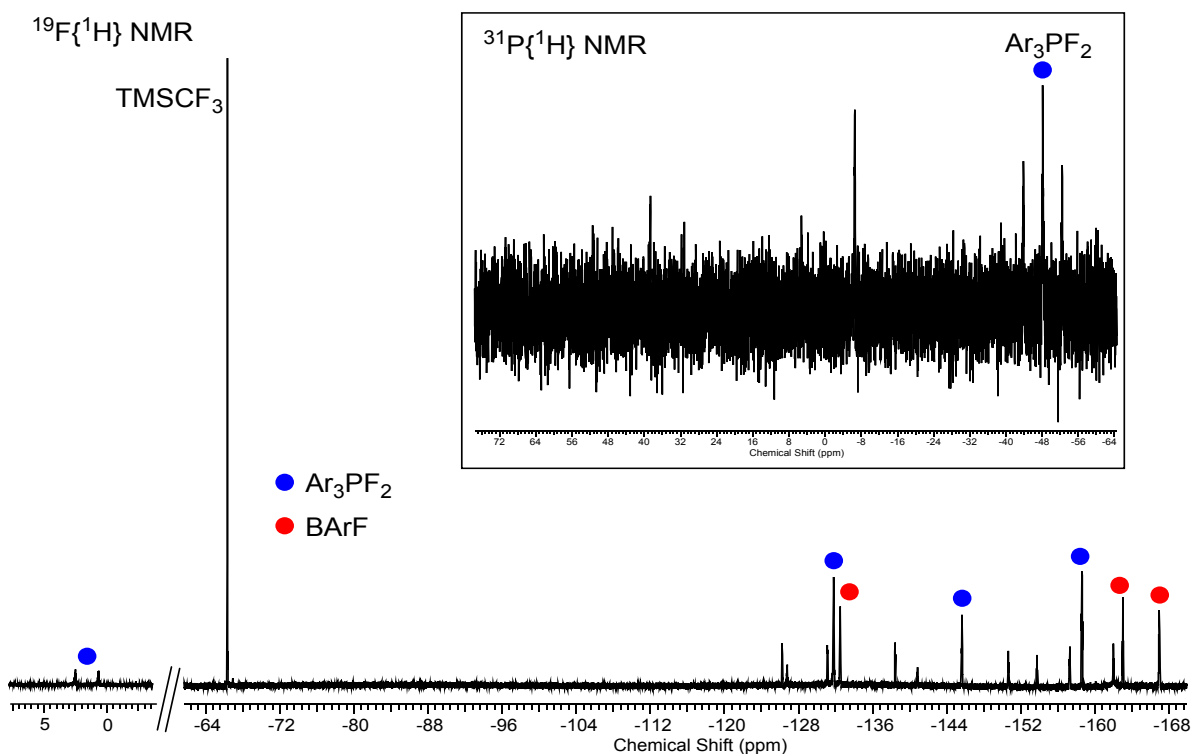

**Figure S3.** *In situ*  $^{31}\text{P}\{^1\text{H}\}$  and  $^{19}\text{F}\{^1\text{H}\}$ -NMR spectra of the reaction with  $[(\text{C}_6\text{F}_5)_3\text{PF}][\text{BArF}]$ , TMSCF<sub>3</sub> and CsF in anhydrous DCM, after 18 h at R.T.

**[Ph<sub>3</sub>POPPh<sub>3</sub>][OTf]<sub>2</sub>:** Under inert atmosphere, in a vial Ph<sub>3</sub>PO (45 mg, 0.16 mmol, 2.0 eq.) was dissolved in anhydrous DCM (0.5 mL), followed by the addition of Tf<sub>2</sub>O (14  $\mu\text{L}$ , 0.08 mmol, 1.0 eq.). After 10 minutes at R.T., a white solid was formed ( $^{31}\text{P}/^{19}\text{F}$  NMR analysis revealed full conversion of Ph<sub>3</sub>PO to [Ph<sub>3</sub>POPPh<sub>3</sub>][OTf]<sub>2</sub>).<sup>2</sup> Then, to the reaction mixture TMSCF<sub>3</sub> (25  $\mu\text{L}$ , 0.17 mmol, 2.1 eq.) and CsF (25 mg, 0.16 mmol, 2.0 eq.) were added. After leaving the reaction mixture stirring at R.T. for 4 hours, Ph<sub>3</sub>PF was detected as major species with minimal TMSCF<sub>3</sub> activation observed). Diagnostic peaks:  $^{31}\text{P}\{^1\text{H}\}$  NMR  $\delta = 94.7$  ppm (d,  $^1J_{\text{P-F}} = 996$  Hz) and  $^{19}\text{F}\{^1\text{H}\}$  NMR  $\delta = -128.0$  ppm (d,  $^1J_{\text{P-F}} = 996$  Hz), in accordance with those reported in the literature.<sup>5</sup>

Note: in the [Ph<sub>3</sub>POPPh<sub>3</sub>][OTf]<sub>2</sub> formation, the small peaks at 65 ppm and 52 ppm are related to the coordination of one or two [OTf]<sup>-</sup> to the dication, respectively.<sup>2</sup>

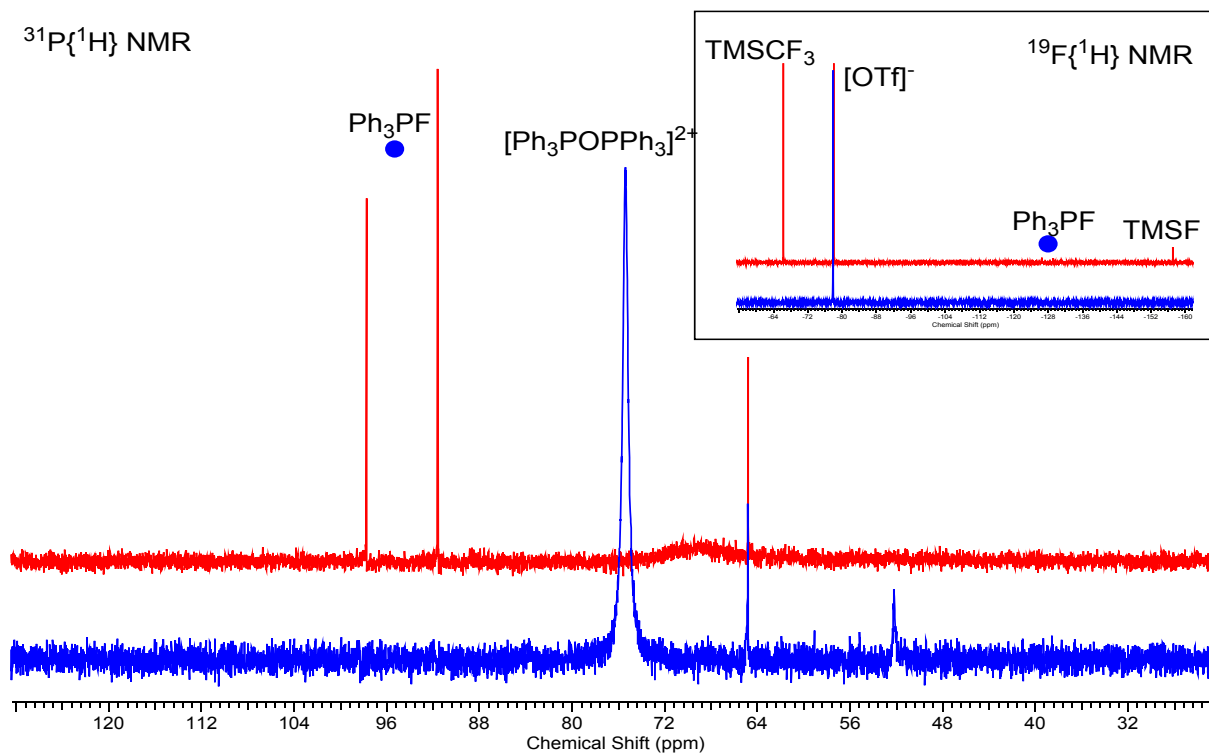

**Figure S4.** *In situ*  $^{31}\text{P}\{^1\text{H}\}$  and  $^{19}\text{F}\{^1\text{H}\}$ -NMR spectra of the reaction with  $[\text{Ph}_3\text{POPPh}_3][\text{OTf}]_2$ ,  $\text{TMSCF}_3$  and  $\text{CsF}$  in anhydrous DCM, after 18 h at R.T.

### 3. Catalyst synthesis

#### 3.1 Synthesis of diphenyl(trifluoromethyl)phosphine (Ph<sub>2</sub>PCF<sub>3</sub>)

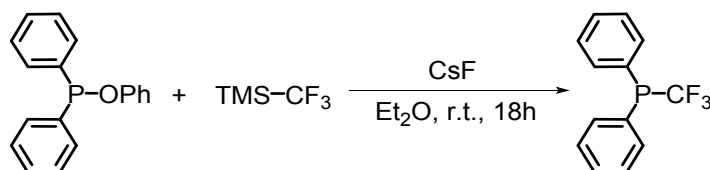

Under anhydrous conditions, an ampoule was charged with diphenyl phenoxy phosphine (2.40 g, 8.45 mmol, 1.00 eq.) and caesium fluoride (0.76 g, 4.75 mmol, 0.56 eq.) in distilled Et<sub>2</sub>O (15 mL), followed by the addition of trifluoromethyl trimethylsilane (1.90 mL, 12.70 mmol, 1.50 eq.). The ampoule was sealed and the solution stirred at room temperature for 18 hours. The obtained orange solution was then filtered and the solvent removed. The resulting crude oil was purified by flash chromatography on silica gel (100% hexane), yielding diphenyl(trifluoromethyl)phosphine as a colourless oil (1.83 g, 7.2 mmol, 85%).  $R_f = 0.22$ . <sup>1</sup>H NMR (400 MHz, CDCl<sub>3</sub>) δ 7.55-7.65 (m, 4H), 7.40-7.52 (m, 6H) ppm. <sup>31</sup>P{<sup>1</sup>H} NMR (162 MHz, CDCl<sub>3</sub>): δ 2.57 ppm (q,  $J = 73.2$  Hz). <sup>19</sup>F{<sup>1</sup>H} NMR (376 MHz, CDCl<sub>3</sub>): δ -55.1 ppm (d,  $J = 72.7$  Hz). The results are in accordance with those reported in the literature.<sup>6</sup>

#### 3.2 Synthesis of triphenyl(trifluoromethyl)phosphonium trifluoromethanesulfonate ([1][OTf])

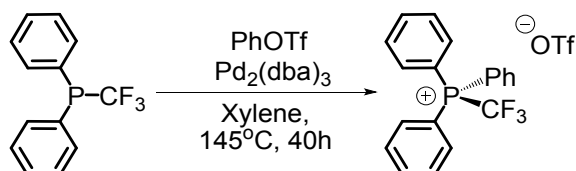

Under anhydrous conditions, an ampoule was charged with tris(dibenzylideneacetone)dipalladium(0) (0.12 g, 0.12 mmol, 0.05 eq.) in distilled xylene (1 mL), followed by the addition of phenyltriflate (1.01 mL, 6.11 mmol, 2.50 eq.) and diphenyl(trifluoromethyl)phosphine (0.50 mL, 2.45 mmol, 1.00 eq.). The ampoule was sealed and the solution stirred at 145°C for 40 hours. Upon heating, a dark orange solution with a whitish precipitate was found. The solvent was removed under vacuum and the crude left was washed with hexane. The solid left was dissolved in DCM and filtered. The obtained orange solution was concentrated and a recrystallization in DCM/hexane was performed twice to obtain triphenyl(trifluoromethyl)- phosphonium trifluoromethanesulfonate **[1][OTf]** as a pale brown solid after the removal of the solvent (1.00 g, 2.08 mmol, 85%). <sup>1</sup>H NMR (400 MHz, CDCl<sub>3</sub>) δ 7.97-8.12 (m, 3H), 7.72-7.95 (m, 12H) ppm. <sup>13</sup>C{<sup>1</sup>H} NMR (100 MHz, CDCl<sub>3</sub>): δ 138.0 (d,  $J = 2.9$  Hz), 134.8 (d,  $J = 11.7$  Hz), 131.6 (d,  $J = 13.7$  Hz), 109.6 (d,  $J = 86.1$  Hz) ppm (the trifluoromethyl carbons could not be detected). <sup>31</sup>P{<sup>1</sup>H}

NMR (162 MHz, CDCl<sub>3</sub>): δ 27.5 ppm (q, *J* = 92.3 Hz). <sup>19</sup>F{<sup>1</sup>H} NMR (376 MHz, CDCl<sub>3</sub>): δ -58.2 ppm (d, *J* = 92.3 Hz), -78.2 (s) ppm. Elemental analysis for C<sub>20</sub>H<sub>15</sub>F<sub>6</sub>O<sub>3</sub>PS: calcd C 50.01 H 3.15, found C 50.20 H 3.37. HRMS (MS ESI+) for [1]<sup>+</sup>: *m/z* 331.0856 (calcd 331.0858).

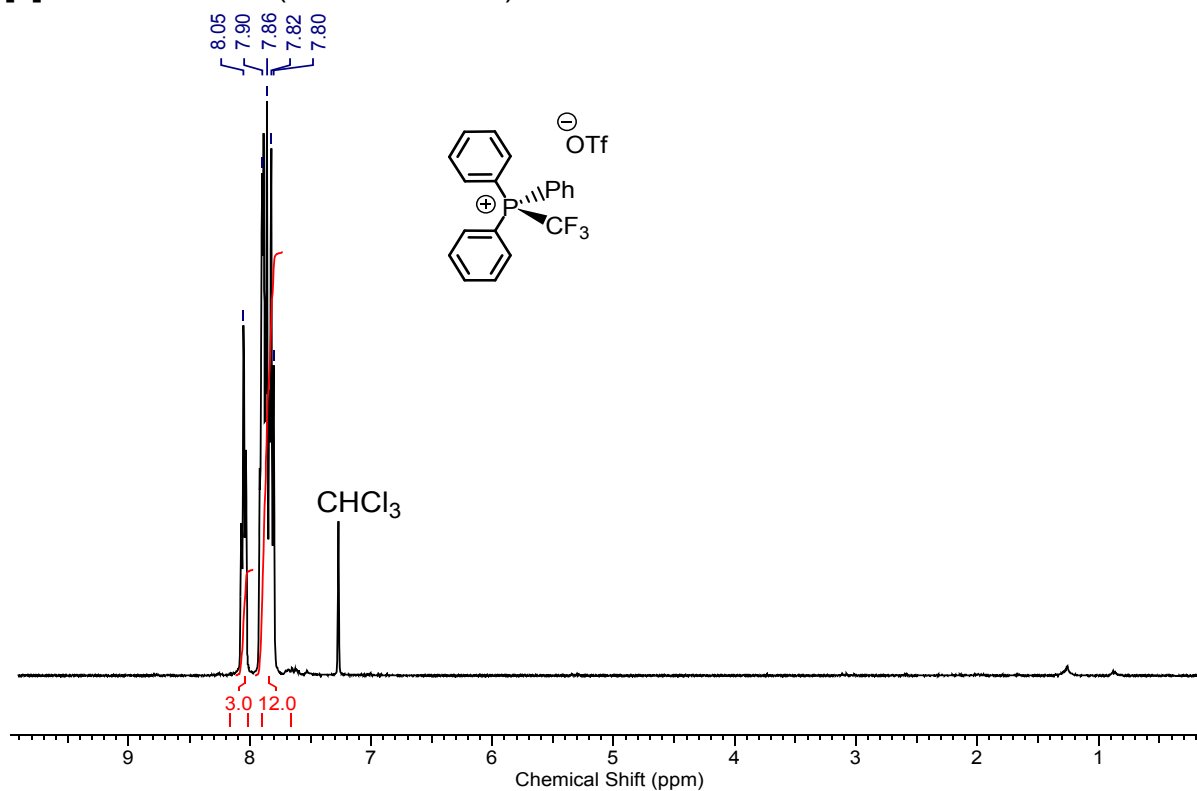

**Figure S5.** <sup>1</sup>H-NMR spectrum of [1][OTf] in dried CDCl<sub>3</sub>.

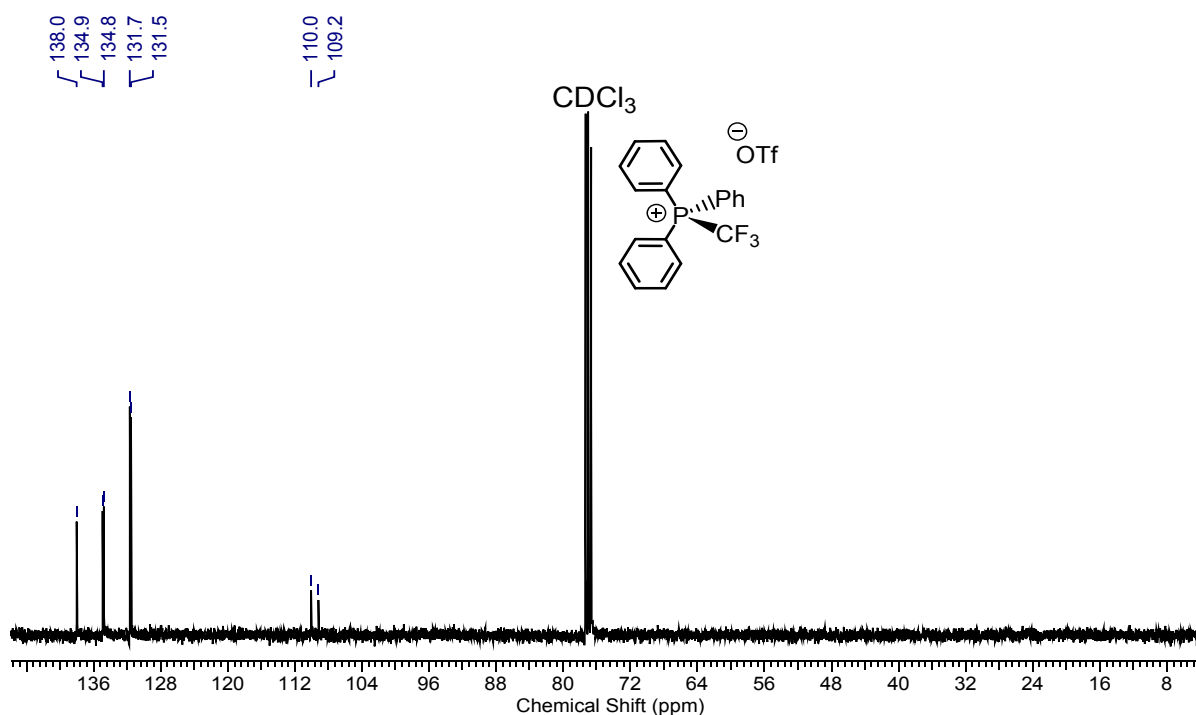

**Figure S6.** <sup>13</sup>C{<sup>1</sup>H}-NMR spectrum of [1][OTf] in dried CDCl<sub>3</sub>.



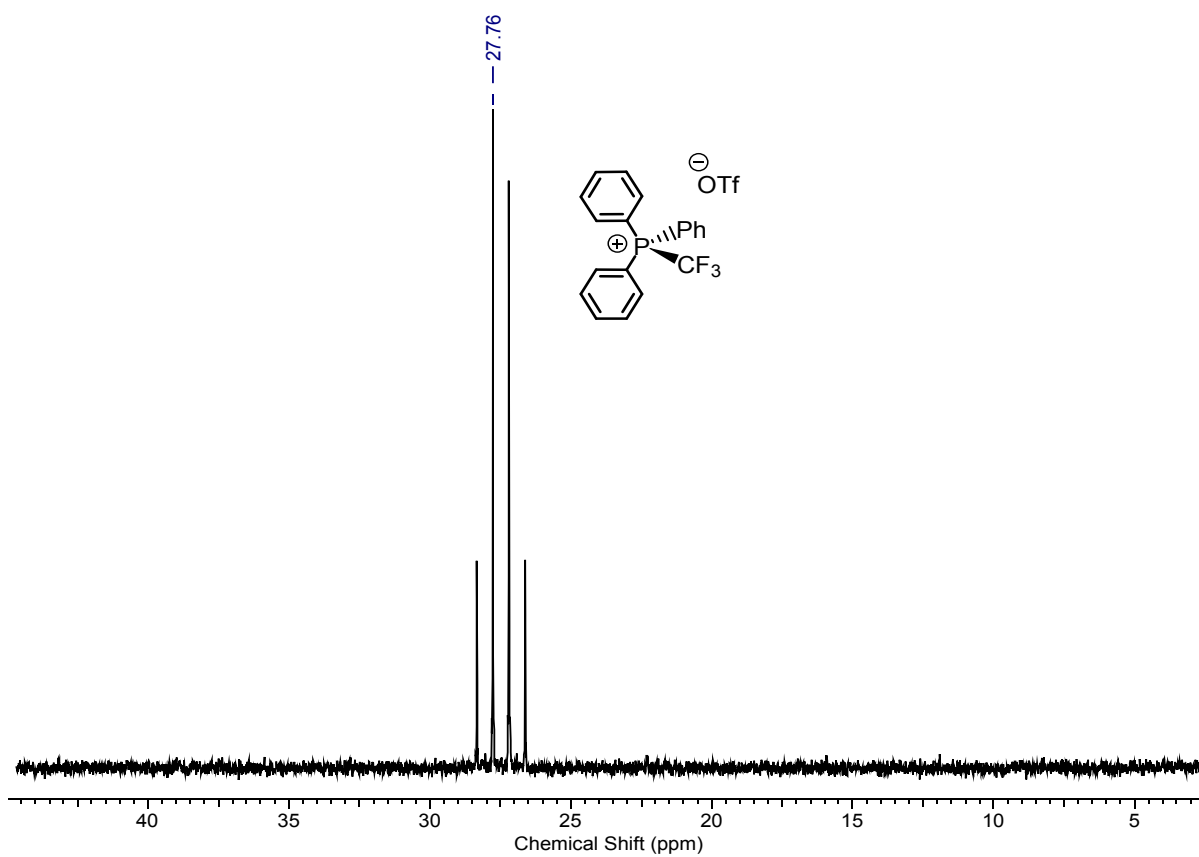

Figure S7.  $^{31}\text{P}\{^1\text{H}\}$ -NMR spectrum of **[1][OTf]** in dried  $\text{CDCl}_3$ .

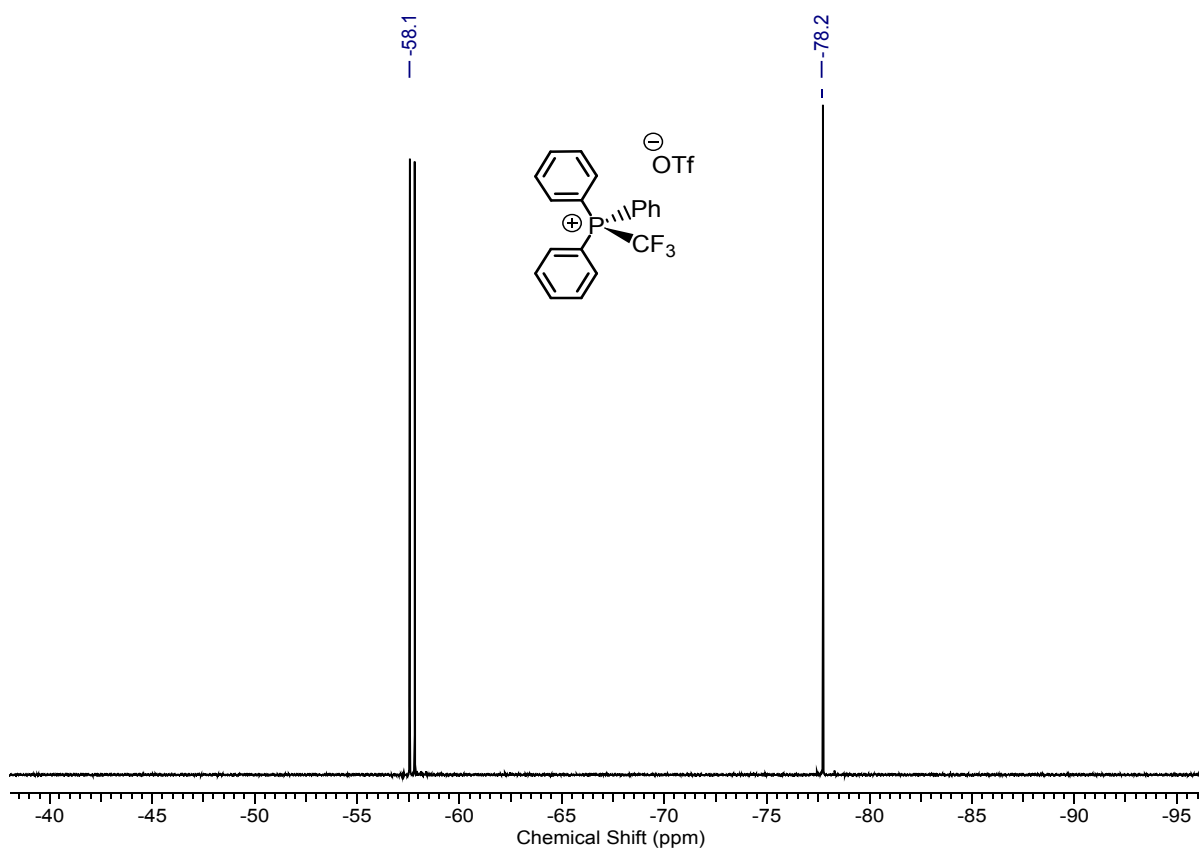

Figure S8.  $^{19}\text{F}\{^1\text{H}\}$ -NMR spectrum of **[1][OTf]** in dried  $\text{CDCl}_3$ .

### 3.3 Synthesis of triphenyl(trifluoromethyl)phosphonium tetrakis(pentafluorophenyl)borate ([1][BArF])

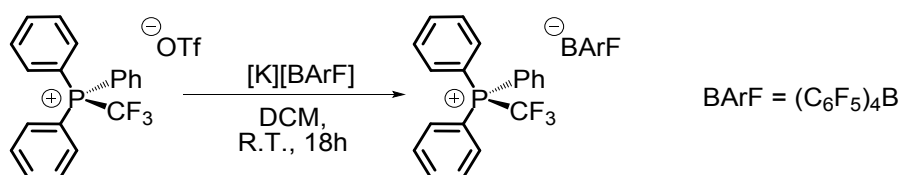

Under anhydrous conditions, in a 20 mL vial potassium tetrakis(pentafluorophenyl)borate (329 mg, 0.46 mmol, 1.10 eq.) was dissolved in distilled DCM (15 mL), followed by the addition of **[1][OTf]** (200 mg, 0.42 mmol, 1.00 eq.). The vial was sealed and the light brown suspension was stirred at ambient temperature for 18 hours. The resultant suspension was filtered over celite. The obtained solution was precipitated with hexane, decanted, and dried under vacuum. The crude left was washed with hexane and dried under vacuum. The obtained solid was recrystallized in DCM/hexane, providing **[1][BArF]** as a light brown solid (371 mg, 0.37 mmol, 88%). <sup>1</sup>H NMR (500 MHz, CDCl<sub>3</sub>) δ 7.63-7.76 (m(br), 6H), 7.81 (m(br), 6H), 8.03 ppm (m(br), 3H). <sup>13</sup>C{<sup>1</sup>H} NMR (125 MHz, CDCl<sub>3</sub>): δ 109.7 (d, *J* = 86.5 Hz), 124.0 (m,(br)), 131.8 (d, *J* = 13.7 Hz), 134.6 (d, *J* = 10.9 Hz), 136.3 (d(br), *J* = 240 Hz), 138.2 (d(br), *J* = 240 Hz), 138.4 (d, *J* = 3.3 Hz), 148.2 ppm (d(br), *J* = 238 Hz) (the trifluoromethyl carbon). <sup>31</sup>P{<sup>1</sup>H} NMR (202 MHz, CDCl<sub>3</sub>): δ 27.5 ppm (q, *J* = 94.8 Hz). <sup>19</sup>F{<sup>1</sup>H} NMR (470 MHz, CDCl<sub>3</sub>): δ -58.0 ppm (d, *J* = 95.4 Hz), -132.6 (s), -163.1 (t, *J* = 20.5 Hz), -166.9 ppm (t, *J* = 16.0 Hz). <sup>11</sup>B{<sup>1</sup>H} NMR (160 MHz, CDCl<sub>3</sub>) δ -16.7 ppm (s). Elemental analysis for C<sub>43</sub>H<sub>15</sub>BF<sub>23</sub>P: calcd C 51.12 H 1.50, found C 51.66 H 1.60.

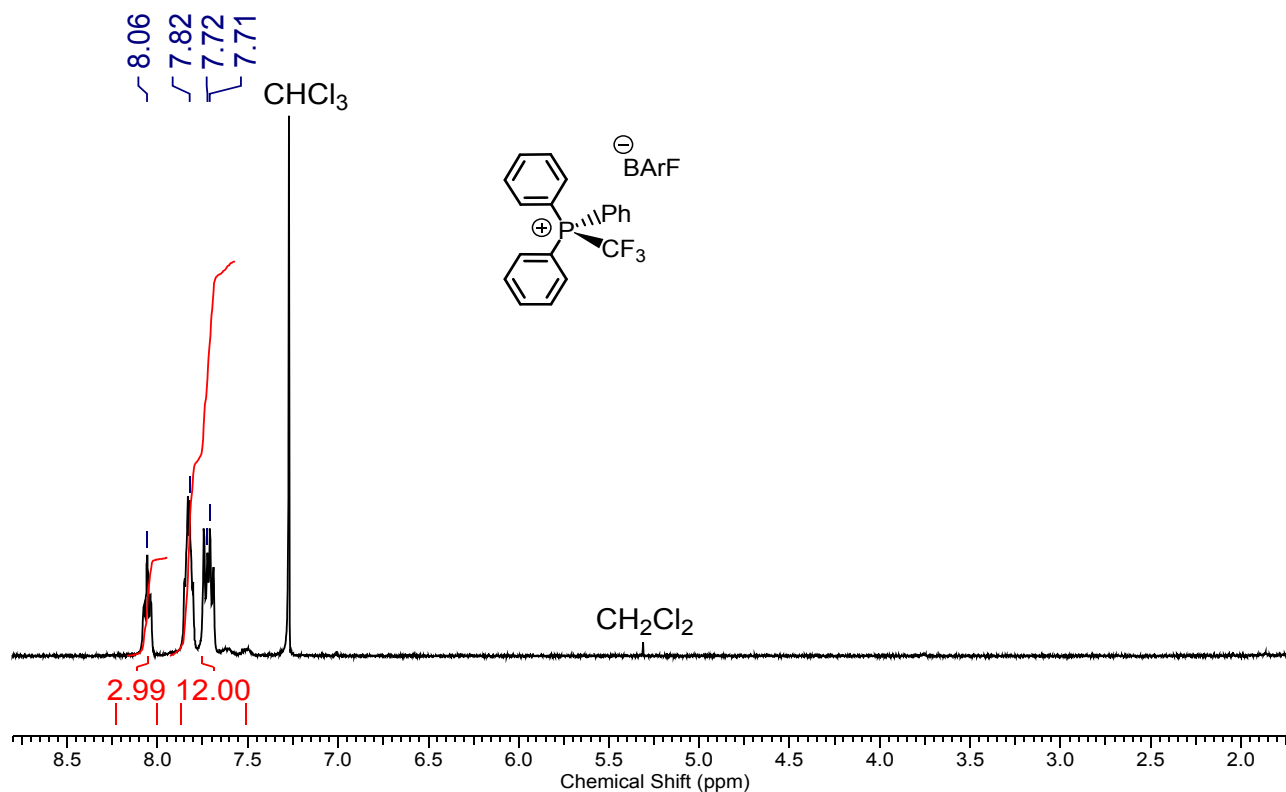

**Figure S9.** <sup>1</sup>H-NMR spectrum of **[1][BArF]** in dried CDCl<sub>3</sub>.

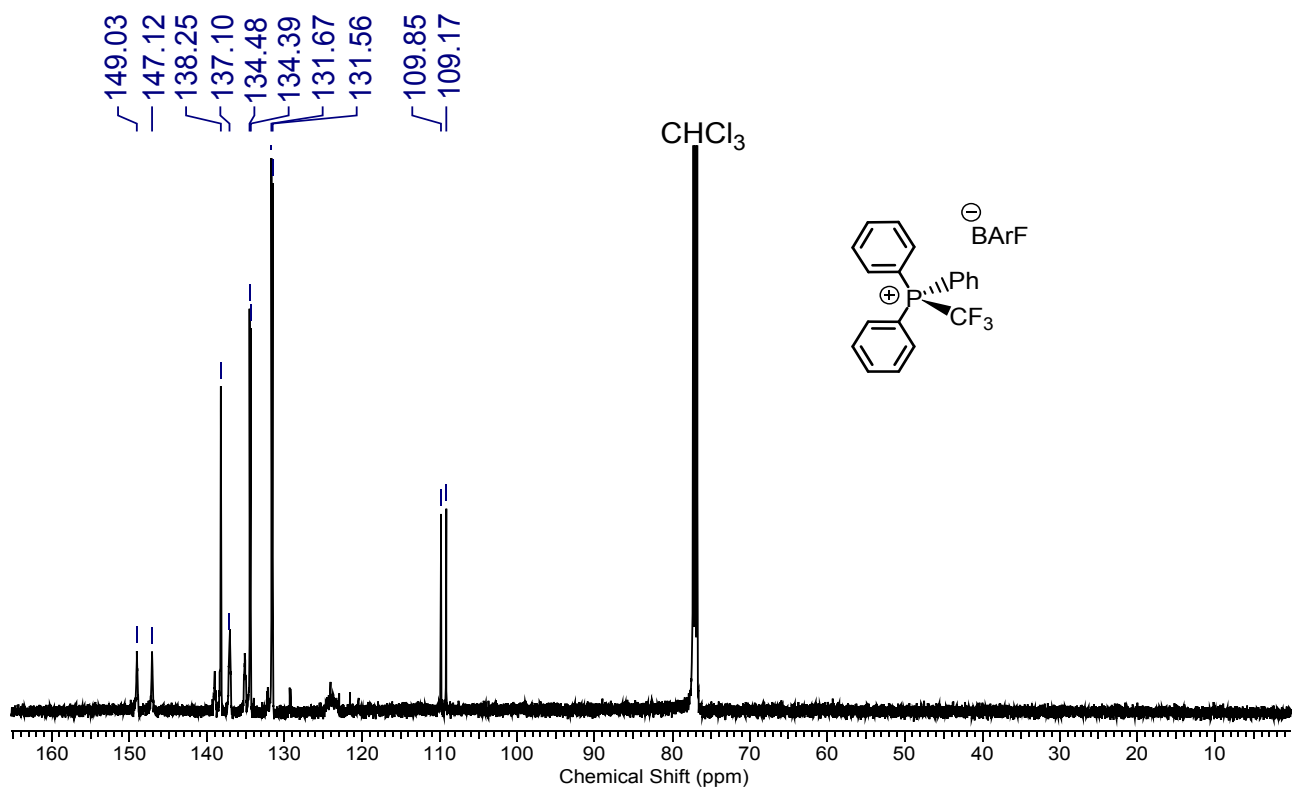

**Figure S10.**  $^{13}\text{C}\{^1\text{H}\}$ -NMR spectrum of **[1][BARF]** in dried  $\text{CDCl}_3$ .

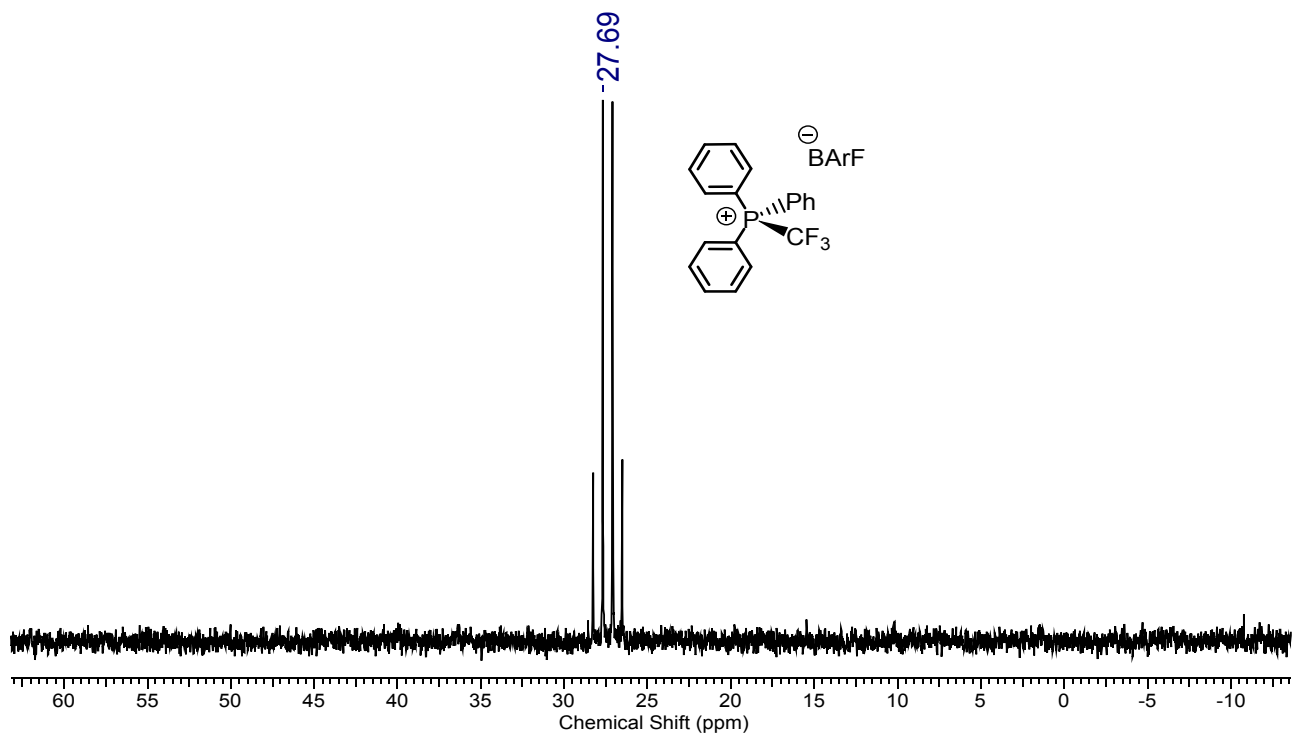

**Figure S11.**  $^{31}\text{P}\{^1\text{H}\}$ -NMR spectrum of **[1][BARF]** in dried  $\text{CDCl}_3$ .

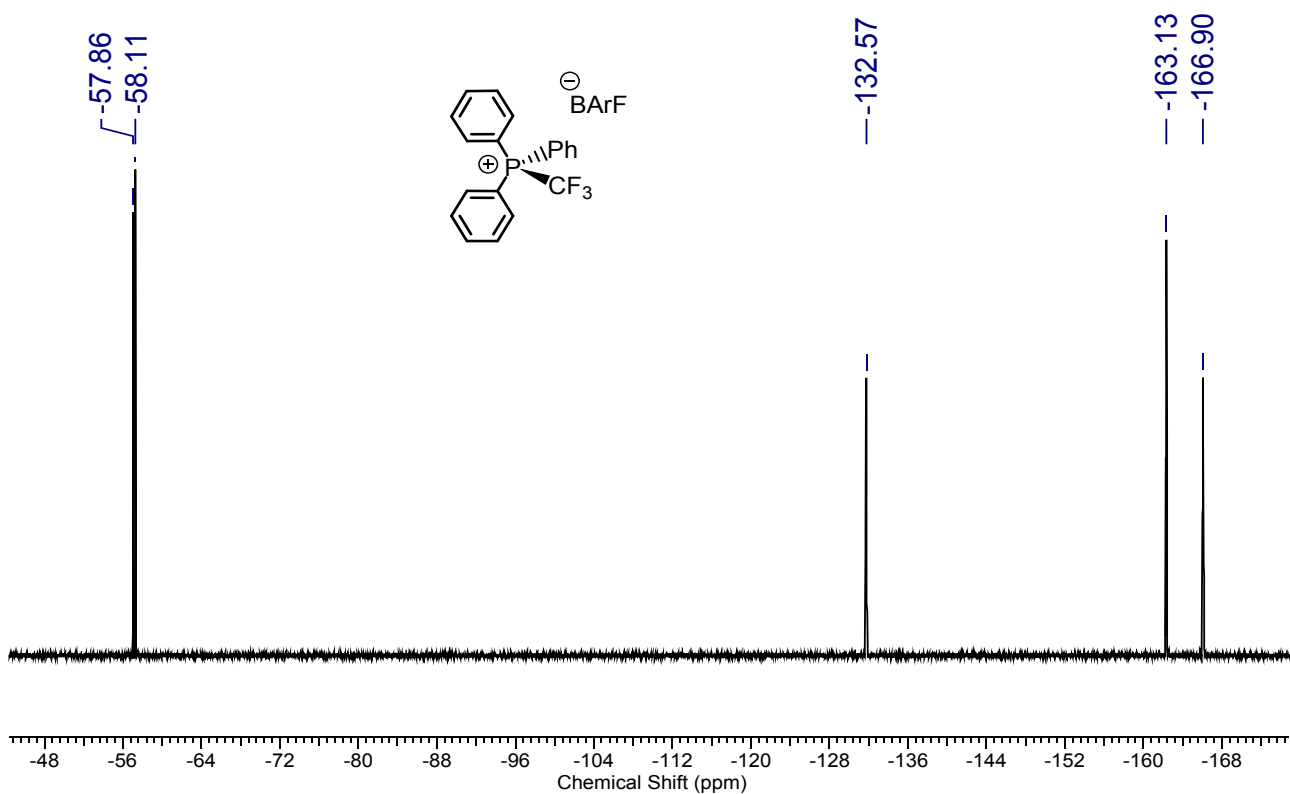

**Figure S12.**  $^{19}\text{F}\{^1\text{H}\}$ -NMR spectrum of **[1][BARF]** in dried  $\text{CDCl}_3$ .

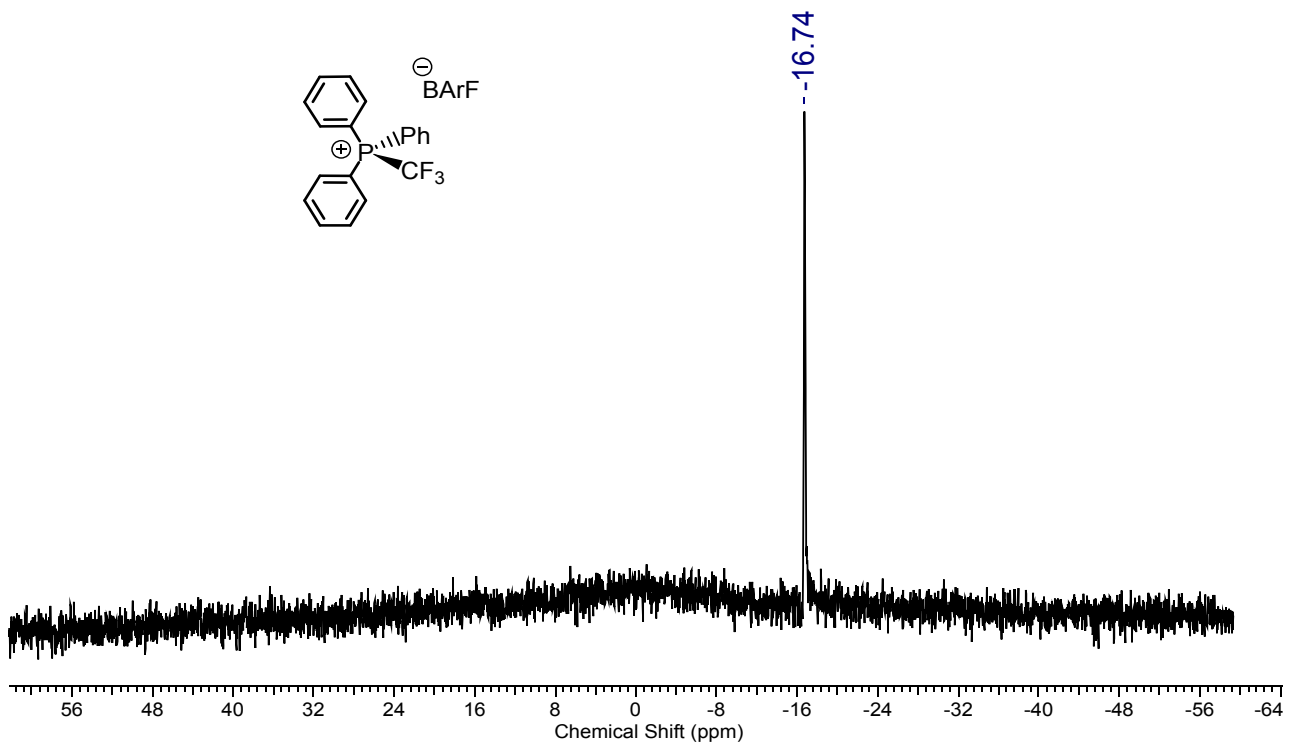

**Figure S13.**  $^{11}\text{B}\{^1\text{H}\}$ -NMR spectrum of **[1][BARF]** in dried  $\text{CDCl}_3$ .

### 3.4. Synthesis of methyldiphenyl(trifluoromethyl)phosphonium trifluoromethanesulfonate ([2][OTf])

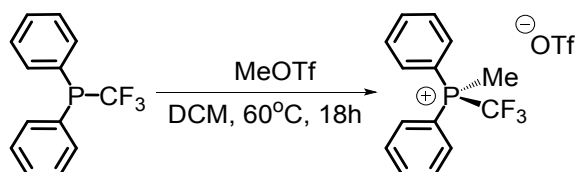

Under anhydrous conditions, an ampoule was charged with diphenyl(trifluoromethyl)phosphine (250  $\mu$ L, 1.22 mmol, 1.00 eq.) in distilled DCM (3 mL), followed by the addition of methyltriflate (155  $\mu$ L, 1.34 mmol, 1.10 eq.). The ampoule was sealed and the solution stirred at 60°C for 18 hours. Then, the solvent and the excess of the MeOTf were removed under vacuum, obtaining methyldiphenyl(trifluoromethyl)phosphonium trifluoromethanesulfonate **[2][OTf]** as a white powder (440 mg, 1.05 mmol, 86%). <sup>1</sup>H NMR (400 MHz, CDCl<sub>3</sub>)  $\delta$  7.87-8.10 (m, 6H), 7.70-7.86 (m, 4H), 3.09 (d,  $J$  = 14.0 Hz, 3H) ppm. <sup>13</sup>C{<sup>1</sup>H} NMR (100 MHz, CDCl<sub>3</sub>):  $\delta$  137.3 (d,  $J$  = 3.4 Hz), 133.9 (d,  $J$  = 11.2 Hz), 131.1 (d,  $J$  = 13.7 Hz), 110.5 (d,  $J$  = 86.6 Hz), 3.9 (d,  $J$  = 50.9 Hz) ppm (the trifluoromethyl carbons could not be detected). <sup>31</sup>P{<sup>1</sup>H} NMR (162 MHz, CDCl<sub>3</sub>):  $\delta$  29.6 ppm (q,  $J$  = 92.3 Hz). <sup>19</sup>F{<sup>1</sup>H} NMR (376 MHz, CDCl<sub>3</sub>):  $\delta$  -62.9 ppm (d,  $J$  = 92.3 Hz), -78.5 (s) ppm. Elemental analysis for C<sub>15</sub>H<sub>13</sub>F<sub>6</sub>O<sub>3</sub>PS: calcd C 43.07 H 3.13, found C 42.82 H 3.07. HRMS (MS ESI+) for **[2]<sup>+</sup>**:  $m/z$  269.0728 (calcd 269.0701).

*Note: MeOTf is a strong methylating agent (use it in a fumehood at all times and quench it with NaOH<sub>(aq.)</sub> solution).*

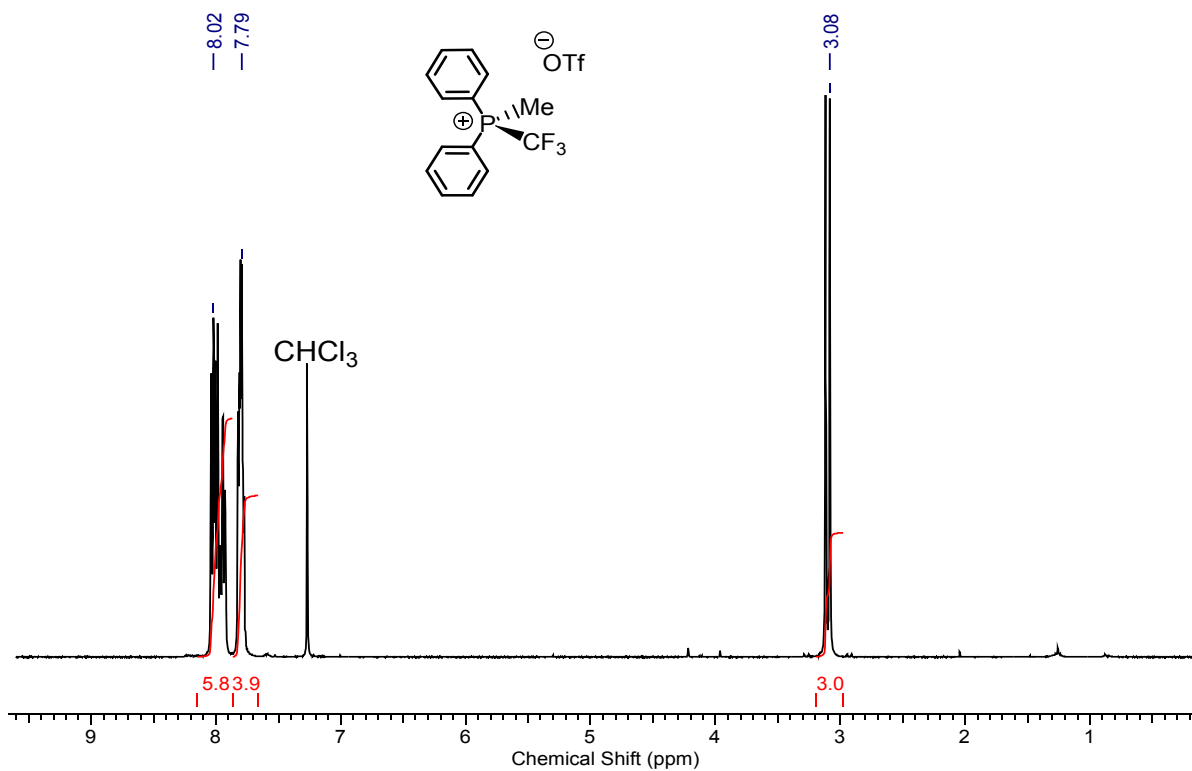

Figure S14. <sup>1</sup>H-NMR spectrum of [2][OTf] in dried CDCl<sub>3</sub>.

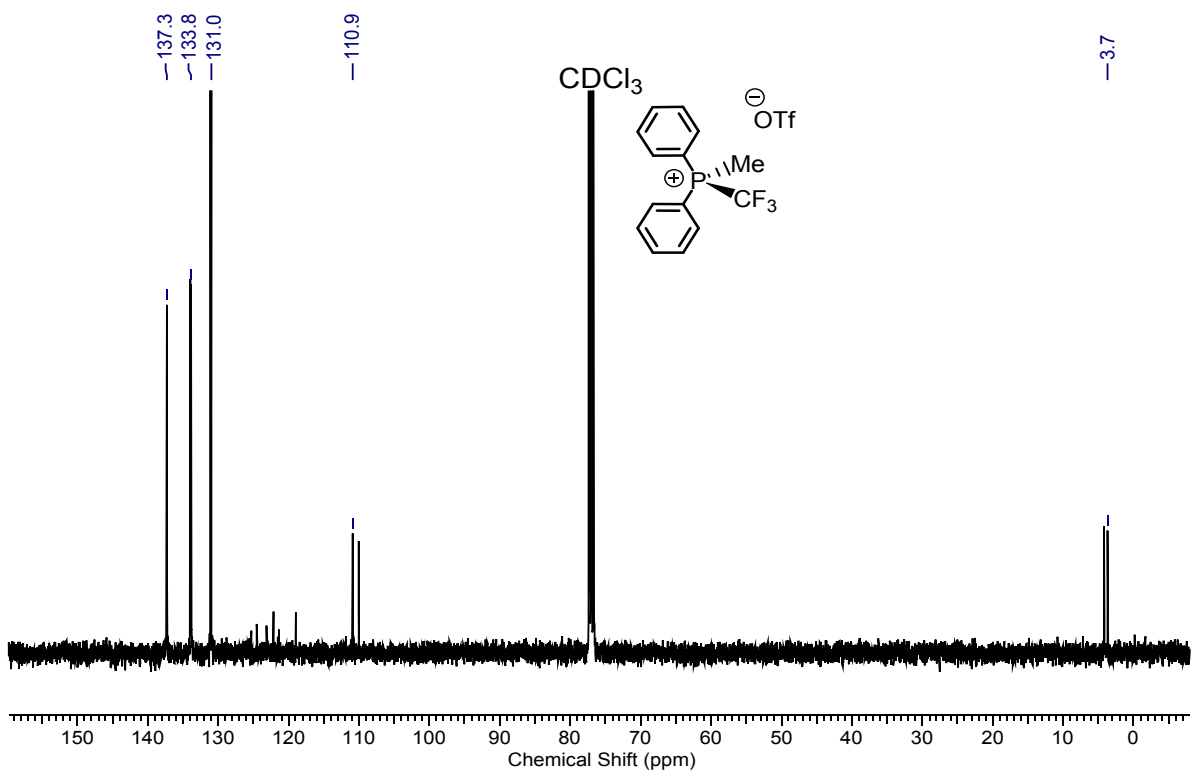

Figure S15. <sup>13</sup>C{<sup>1</sup>H}-NMR spectrum of [2][OTf] in dried CDCl<sub>3</sub>.

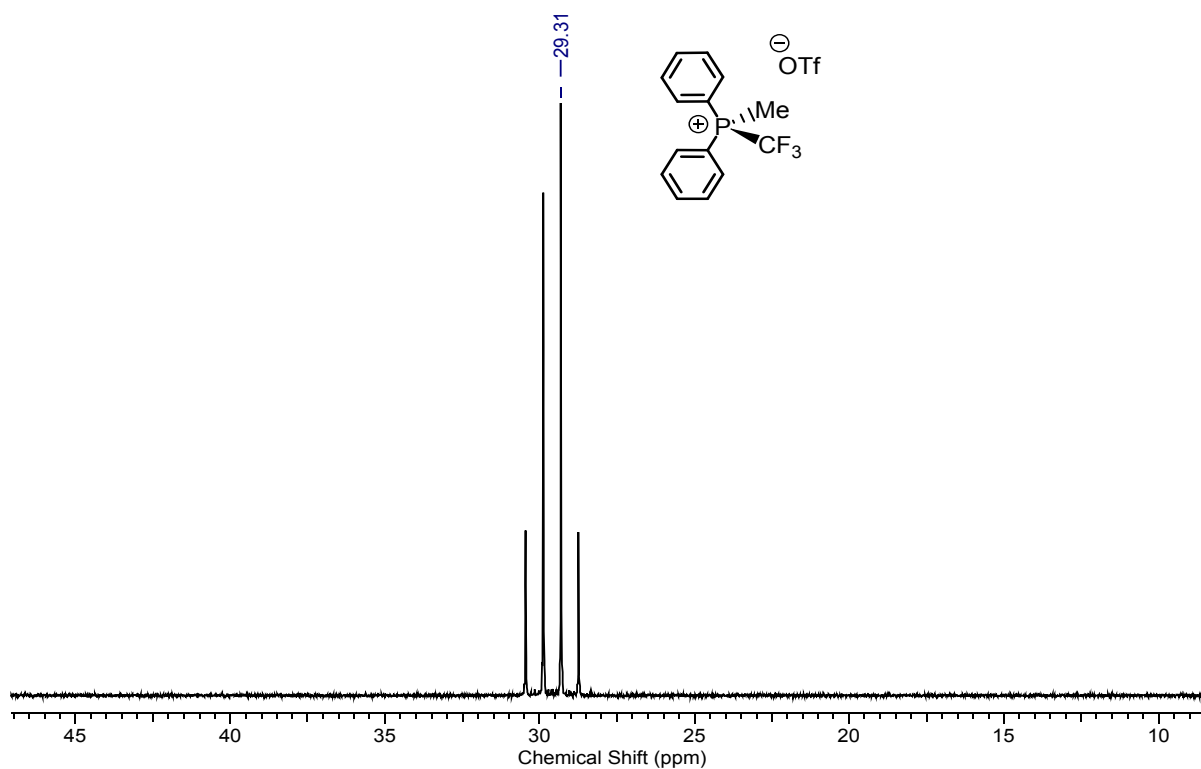

**Figure S16.**  $^{31}\text{P}\{^1\text{H}\}$ -NMR spectrum of **[2][OTf]** in dried  $\text{CDCl}_3$ .

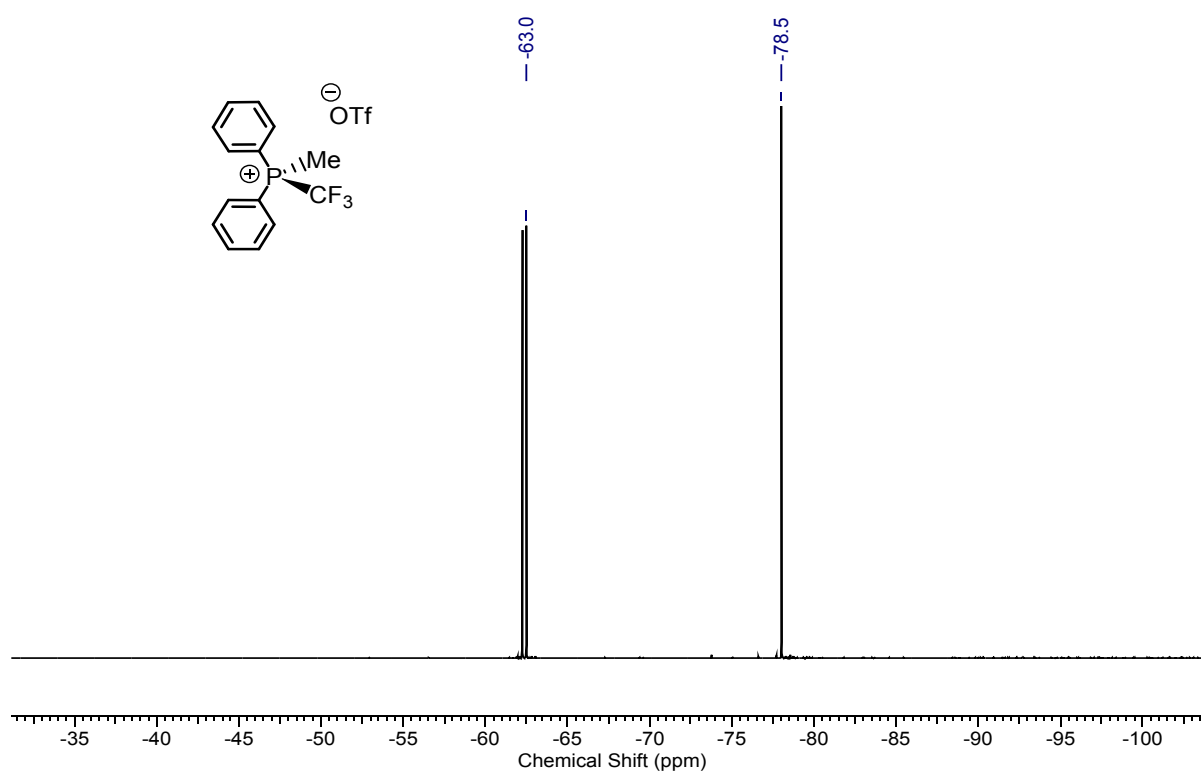

**Figure S17.**  $^{19}\text{F}\{^1\text{H}\}$ -NMR spectrum of **[2][OTf]** in dried  $\text{CDCl}_3$ .

## 4. Stability test

**General procedure:** in a J. Young NMR tube the catalyst was dissolved in  $\text{CDCl}_3$  (0.05 mL), followed by the addition of ROH (R = H, Ph). The system was then heated in an oil bath (see figure captions for the temperatures) and analysed by multinuclear NMR analysis. In the absence of added water, the solutions were made under inert atmosphere with dried  $\text{CDCl}_3$  (0.5 mL). When aniline was involved in the test, it was added after ROH.

### 4.1 Water addition

**[1][OTf]** (9 mg, 1 eq.) +  $\text{H}_2\text{O}$  (4  $\mu\text{L}$ , > 10 eq.).

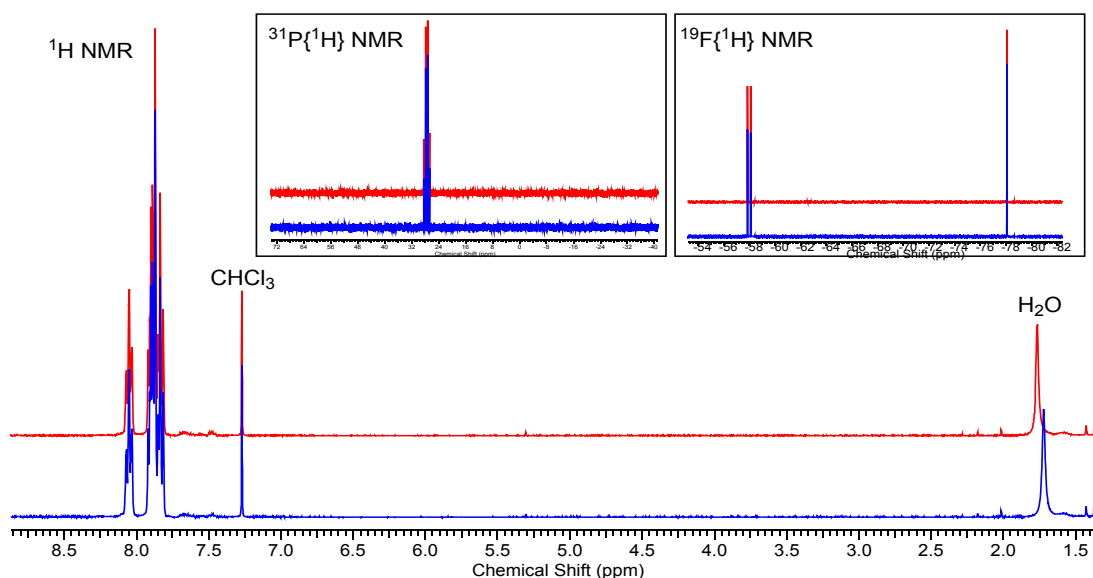

**Figure S18.**  $^1\text{H}$ ,  $^{31}\text{P}\{^1\text{H}\}$  and  $^{19}\text{F}\{^1\text{H}\}$ -NMR spectra of **[1][OTf]** with water in  $\text{CDCl}_3$ . Blue (after 5 min), red (after 18h at  $60^\circ\text{C}$ ).

**[1][BArF]** (10 mg, 1 eq.) +  $\text{H}_2\text{O}$  (4  $\mu\text{L}$ , > 10 eq.) in  $\text{CDCl}_3$  (0.5 mL).



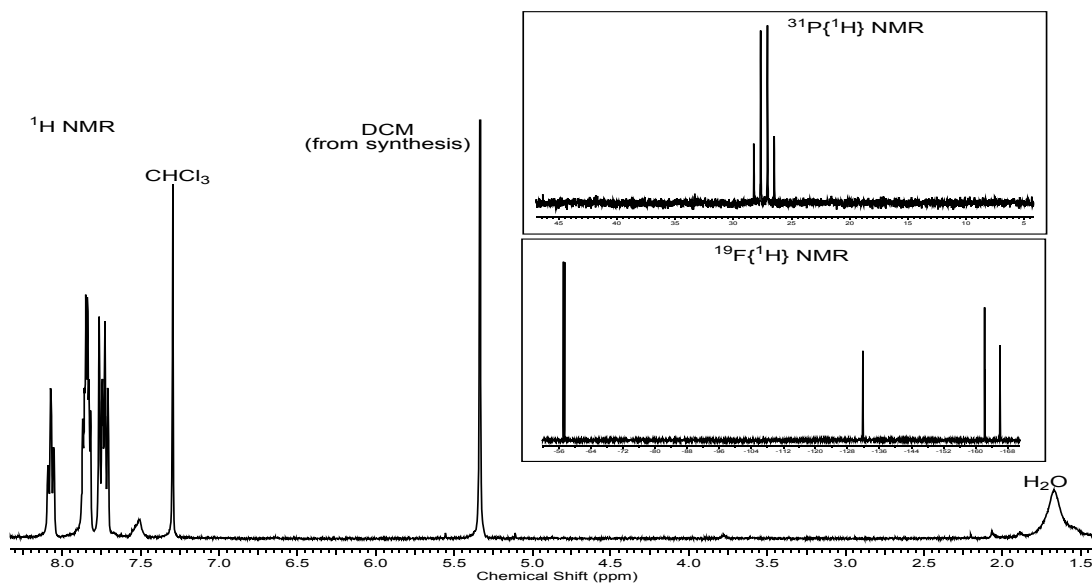

**Figure S19.**  $^1\text{H}$ ,  $^{31}\text{P}\{^1\text{H}\}$  and  $^{19}\text{F}\{^1\text{H}\}$ -NMR spectra of **[1][BARF]** with water in  $\text{CDCl}_3$  after 18h at  $100^\circ\text{C}$ .

**[2][OTf]** (8 mg, 1 eq.) +  $\text{H}_2\text{O}$  (4  $\mu\text{L}$ , > 10 eq.) in  $\text{CDCl}_3$  (0.5 mL).

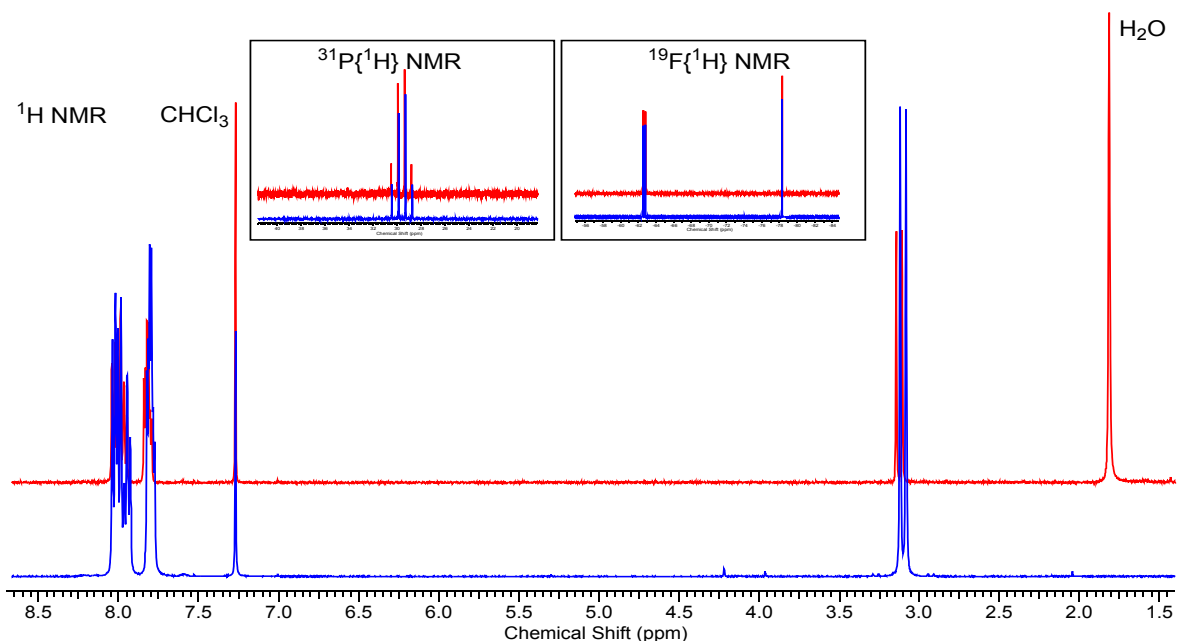

**Figure S20.**  $^1\text{H}$ ,  $^{31}\text{P}\{^1\text{H}\}$  and  $^{19}\text{F}\{^1\text{H}\}$ -NMR spectra of **[2][OTf]** with water in  $\text{CDCl}_3$ . Blue (under anhydrous conditions), red (with water after 18h at  $60^\circ\text{C}$ ). Note: no significant shift is noted when water is added to the system, indicating a very low degree of water coordination.

## 4.2 Phenol addition

**[1][OTf]** (15 mg, 1 eq.) +  $\text{PhOH}$  (3 mg, 1 eq)

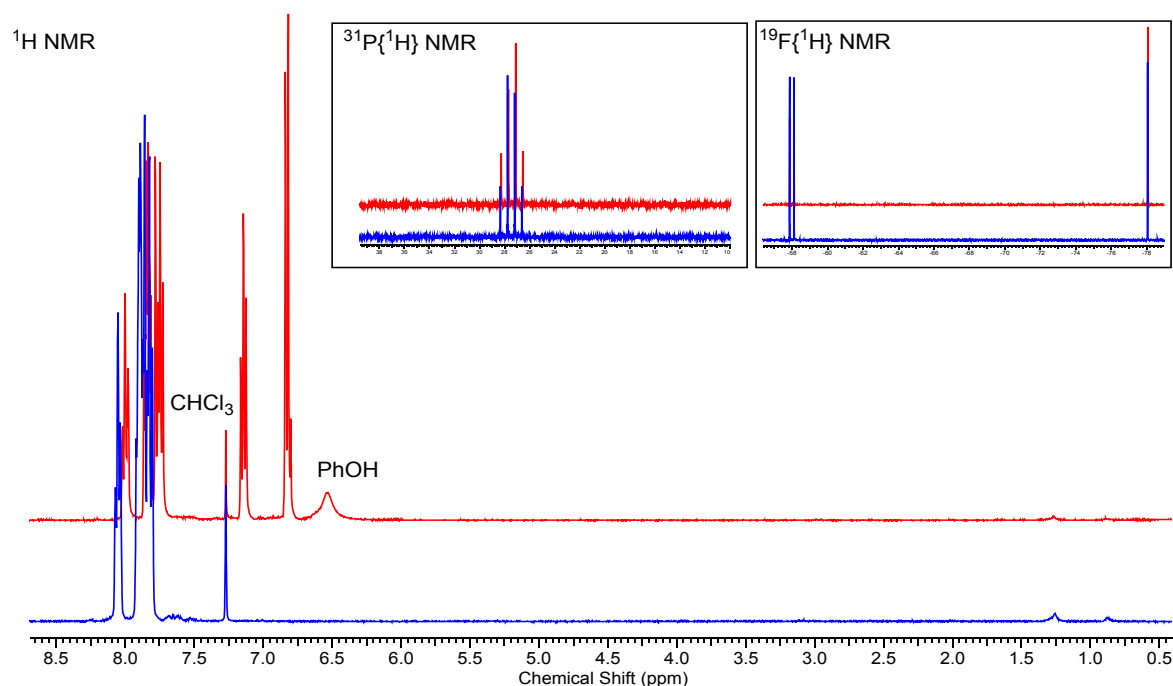

**Figure S21.**  $^1\text{H}$ ,  $^{31}\text{P}\{^1\text{H}\}$  and  $^{19}\text{F}\{^1\text{H}\}$ -NMR spectra of **[1][OTf]** with PhOH in  $\text{CDCl}_3$ . Blue (before PhOH addition), red (after 5 hours at  $60^\circ\text{C}$  from PhOH addition). Note: minimal shift is noted when PhOH is added to the system, indicating a very low degree of PhOH coordination.

**[2][OTf]** (10 mg, 1 eq.) + PhOH (3 mg, 1 eq.)

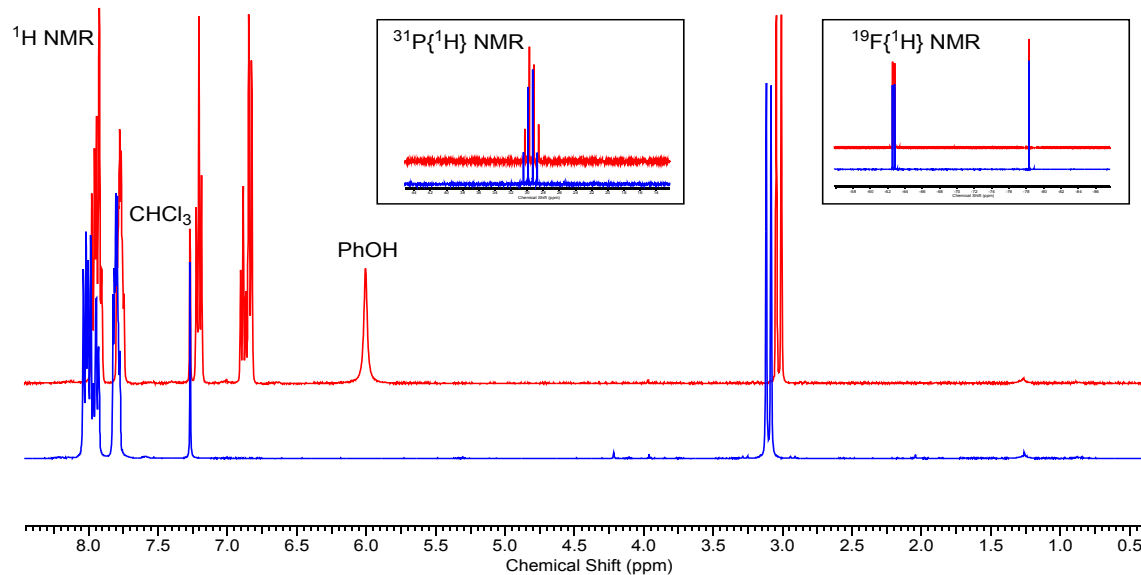

**Figure S22.**  $^1\text{H}$ ,  $^{31}\text{P}\{^1\text{H}\}$  and  $^{19}\text{F}\{^1\text{H}\}$ -NMR spectra of **[2][OTf]** with PhOH in  $\text{CDCl}_3$ . Blue (before PhOH addition), red (after 10 min from PhOH addition). Note: minimal shift is noted when PhOH is added to the system, indicating a very low degree of PhOH coordination.

### 4.3 Phenol / PhNH<sub>2</sub> addition

**[1][OTf]** (15 mg, 1 eq.) + PhOH (3 mg, 1 eq.) + PhNH<sub>2</sub> (3  $\mu\text{L}$ , 1 eq.)

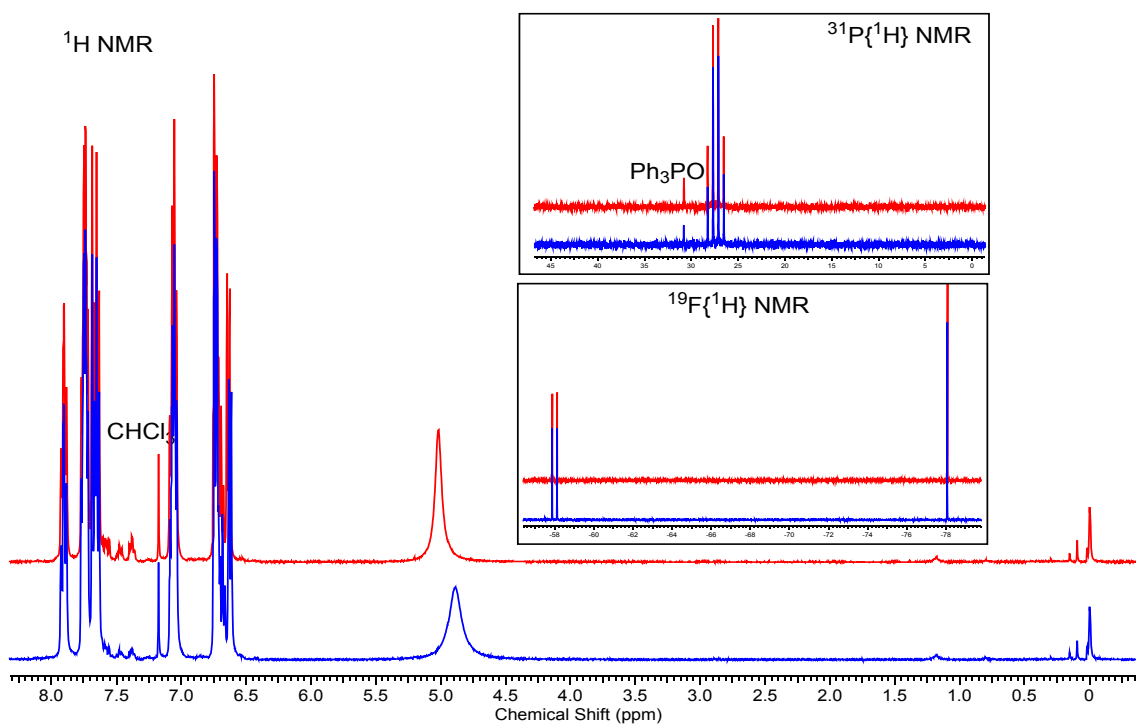

**Figure S23.**  $^1\text{H}$ ,  $^{31}\text{P}\{^1\text{H}\}$  and  $^{19}\text{F}\{^1\text{H}\}$ -NMR spectra of **[1][OTf]** with PhOH / PhNH<sub>2</sub> in CDCl<sub>3</sub>. Blue (after 5 min), red (after 18h at 60°C). Small Ph<sub>3</sub>PO formation is observed on heating most likely due to trace water present in phenol/aniline. **[2][OTf]** (10 mg, 1 eq.) + PhOH (3 mg, 1 eq.) + PhNH<sub>2</sub> (2  $\mu\text{L}$ , 1 eq.) in CDCl<sub>3</sub> (0.5 mL).

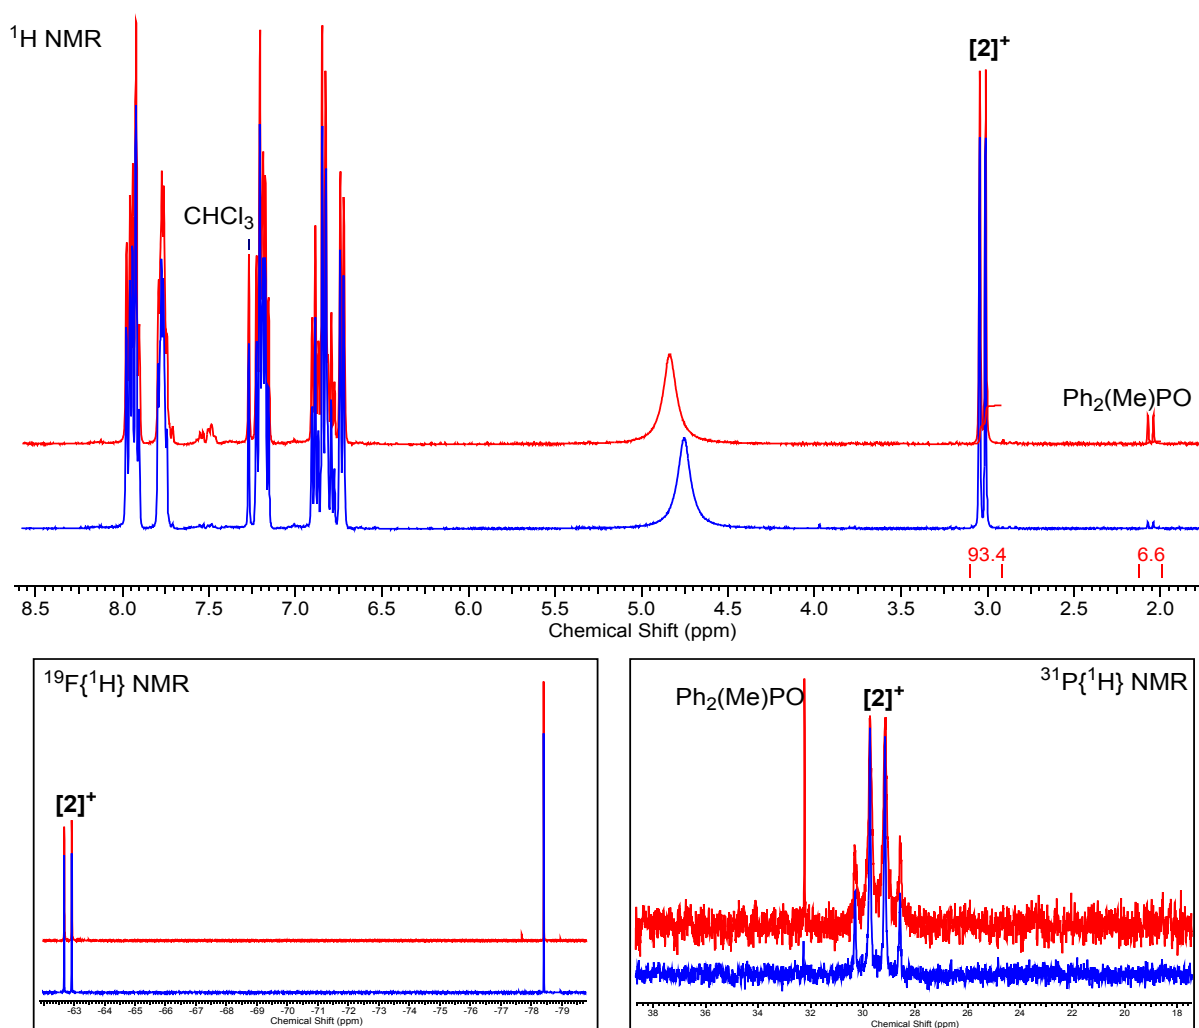

**Figure S24.**  $^1\text{H}$ ,  $^{31}\text{P}\{^1\text{H}\}$  and  $^{19}\text{F}\{^1\text{H}\}$ -NMR spectra of **[2][OTf]** with PhOH / PhNH<sub>2</sub> in dried CDCl<sub>3</sub>. Blue (after 5 min), red (after 18h at 60°C). Note: small Ph<sub>2</sub>(Me)PO formation (~ 7%) is observed on heating most likely due to trace water present in phenol/aniline.

#### 4.4 Water/ PhNH<sub>2</sub> addition

**[1][OTf]** (24 mg, 1 eq.) + H<sub>2</sub>O (1  $\mu\text{L}$ , 1 eq.) + PhNH<sub>2</sub> (5  $\mu\text{L}$ , 1 eq.). After 5 min upon mixing, effervescence was noted, along with white solid formation. NMR analysis revealed HCF<sub>3</sub> ( $^1\text{H}$   $\delta$  = 6.6 ppm, q,  $^2J_{\text{H-F}}$  = 79 Hz;  $^{19}\text{F}$   $\delta$  = -77.8 ppm, d,  $^2J_{\text{H-F}}$  = 79 Hz) and Ph<sub>3</sub>PO ( $^{31}\text{P}$   $\delta$  = 29.9 ppm (s)) as major products. The data are in accordance for those reported in the literature.<sup>7</sup> Note: due to [PhNH<sub>3</sub>]<sup>+</sup> formation, the  $\delta$   $^{31}\text{P}$  value for Ph<sub>3</sub>PO is slightly downfield due to the H-bonding effect.

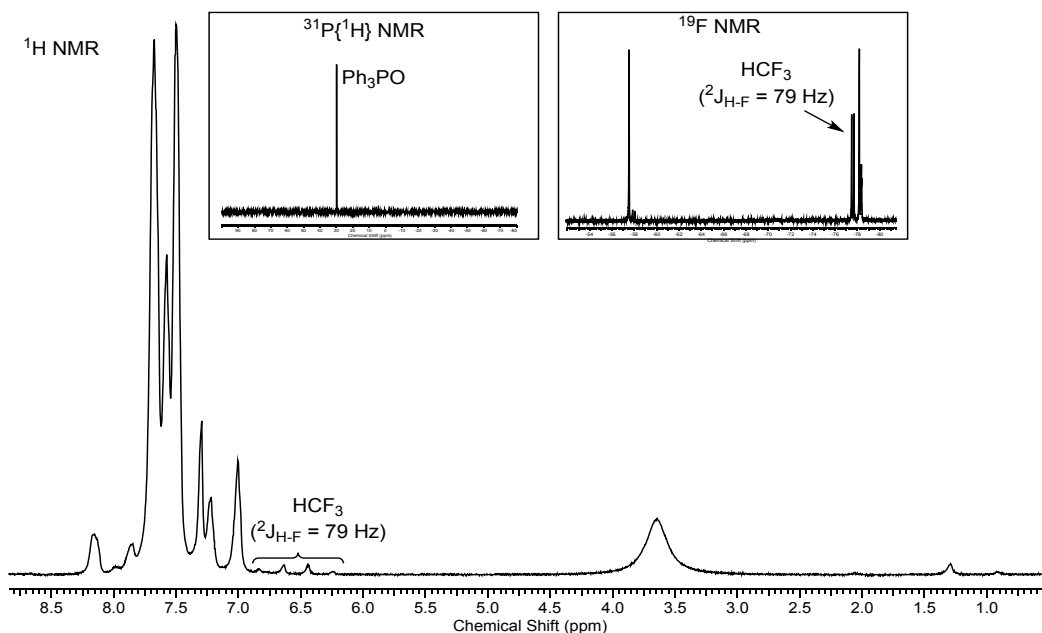

**Figure S25.**  $^1\text{H}$ ,  $^{31}\text{P}\{^1\text{H}\}$  and  $^{19}\text{F}$ -NMR spectra of **[1][OTf]** with  $\text{H}_2\text{O}$  /  $\text{PhNH}_2$  in  $\text{CDCl}_3$ , after 5 min at R.T.

**[2][OTf]** (21 mg, 1 eq.) +  $\text{H}_2\text{O}$  (1  $\mu\text{L}$ , 1 eq.) +  $\text{PhNH}_2$  (5  $\mu\text{L}$ , 1 eq.). After 5 min upon mixing, effervescence was noted, along with white solid formation. NMR analysis revealed  $\text{HCF}_3$  ( $^1\text{H}$   $\delta$  = 6.6 ppm, q,  $^2J_{\text{H-F}}$  = 79 Hz;  $^{19}\text{F}$   $\delta$  = -77.8 ppm, d,  $^2J_{\text{H-F}}$  = 79 Hz) and  $\text{Ph}_2(\text{Me})\text{PO}$  ( $^{31}\text{P}$   $\delta$  = 31.4 ppm (s)) as major products. The data are in accordance for those reported in the literature.<sup>7</sup> Note: due to  $[\text{PhNH}_3]^+$  formation, the  $\delta$   $^{31}\text{P}$  value for  $\text{Ph}_2(\text{Me})\text{PO}$  is slightly downfield due to H-bonding effect.

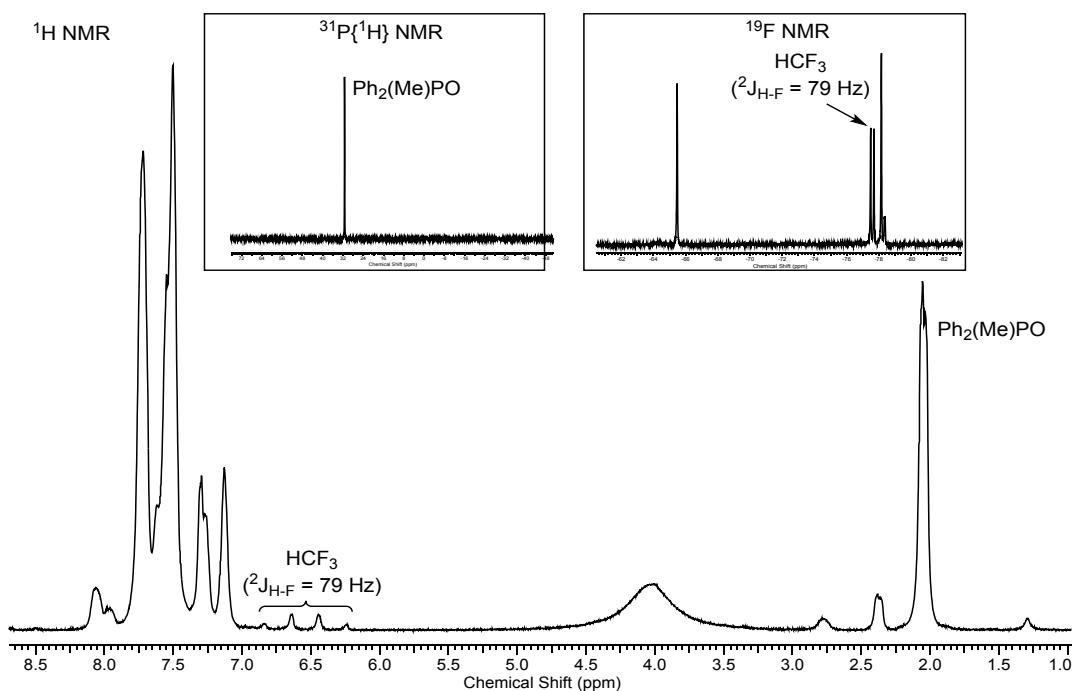

**Figure S26.**  $^1\text{H}$ ,  $^{31}\text{P}\{^1\text{H}\}$  and  $^{19}\text{F}$ -NMR spectra of **[2][OTf]** with  $\text{H}_2\text{O}$  /  $\text{PhNH}_2$  in  $\text{CDCl}_3$ , after 5 min at R.T.

## 4.5 HCl addition

[1][OTf] (6 mg, 1 eq.) + HCl (aq.) 37% (2  $\mu$ L, 2 eq.)

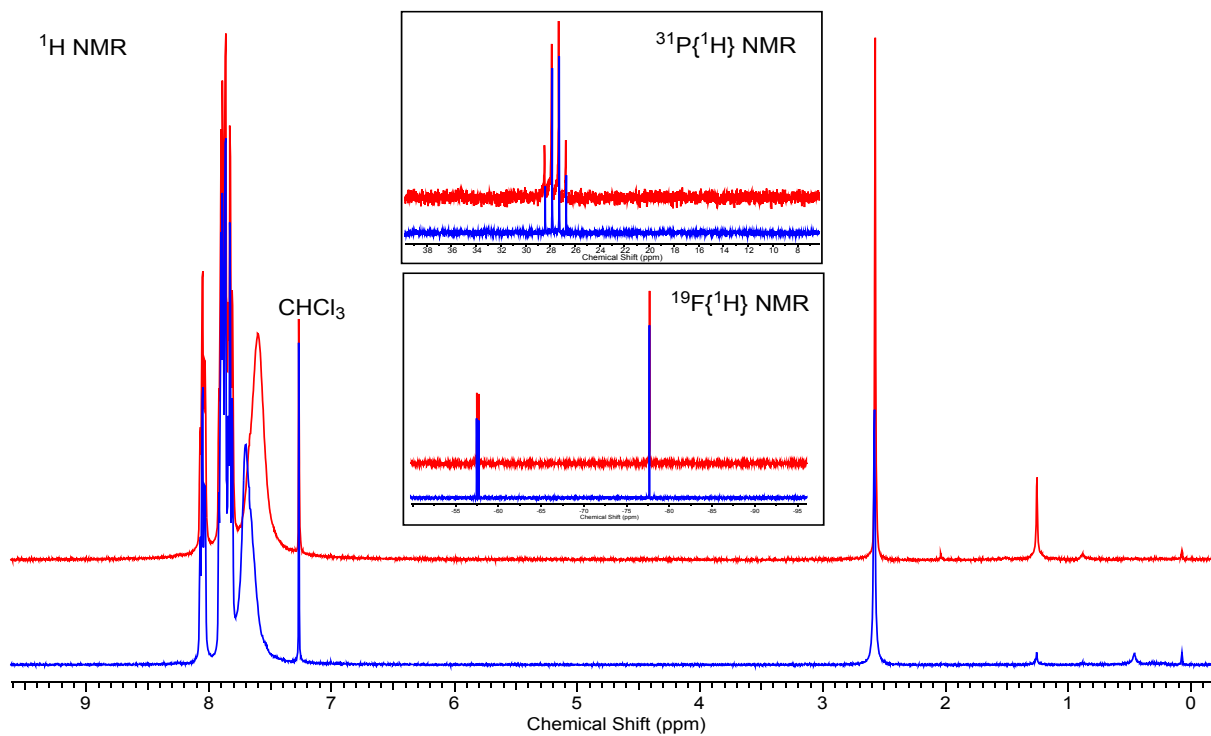

**Figure S27.** <sup>1</sup>H, <sup>31</sup>P{<sup>1</sup>H} and <sup>19</sup>F{<sup>1</sup>H}-NMR spectra of [1][OTf] with HCl in CDCl<sub>3</sub>. Blue (after 5 min), red (after 6h at R.T.)

## 5. Hydride ion affinity calculations

Calculations were performed using the Gaussian09<sup>8</sup> suite of programmes. Structures were optimised at the M06-2X/6-311G(d,p) level with PCM(Dichloromethane) solvation.<sup>9</sup> In all cases, structures were confirmed as minima by frequency analysis and the absence of imaginary frequencies. Structures and energies for Et<sub>3</sub>B and Et<sub>3</sub>BH and were taken from previous work.<sup>10,11</sup> Full Cartesian coordinates for the optimised geometries for the HIA determinations are provided below.

Compound [1]<sup>+</sup>

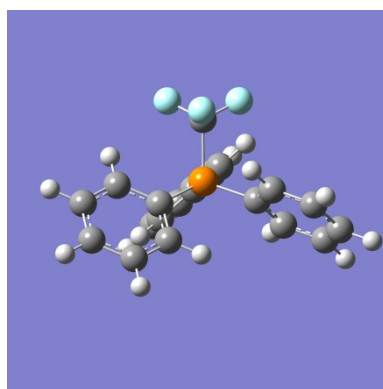

|   |           |           |           |
|---|-----------|-----------|-----------|
| P | -0.582200 | 0.304900  | 0.138900  |
| C | -0.012200 | -1.387800 | 0.061800  |
| C | -0.933600 | -2.424500 | 0.225200  |
| C | 1.349400  | -1.651700 | -0.135200 |
| C | -0.484200 | -3.738700 | 0.188200  |
| H | -1.985000 | -2.212300 | 0.379000  |
| C | 1.779500  | -2.969200 | -0.173400 |
| H | 2.065300  | -0.846900 | -0.257300 |
| C | 0.865000  | -4.008100 | -0.011600 |
| H | -1.190900 | -4.548600 | 0.314400  |
| H | 2.828600  | -3.184600 | -0.329700 |
| H | 1.209600  | -5.034500 | -0.041800 |
| C | -2.363400 | 0.434400  | 0.038600  |
| C | -3.078700 | 0.879700  | 1.152600  |
| C | -3.018900 | 0.047700  | -1.137300 |
| C | -4.465200 | 0.940800  | 1.083900  |
| C | -4.402500 | 0.120700  | -1.189900 |
| C | -5.121800 | 0.565200  | -0.082500 |
| C | 0.093700  | 1.205000  | 1.527800  |
| C | 0.786700  | 0.516900  | 2.526000  |
| C | -0.100500 | 2.590400  | 1.601900  |
| C | 1.290700  | 1.227400  | 3.608600  |
| H | 0.930300  | -0.555300 | 2.463400  |
| C | 0.412200  | 3.283700  | 2.687300  |
| C | 1.104800  | 2.602900  | 3.686800  |
| H | 1.827600  | 0.703800  | 4.389000  |

|   |           |           |           |
|---|-----------|-----------|-----------|
| H | 0.270600  | 4.354600  | 2.753700  |
| H | 1.501300  | 3.150900  | 4.532600  |
| C | 0.096400  | 1.156600  | -1.406400 |
| F | -0.472100 | 2.347500  | -1.562200 |
| F | 1.410700  | 1.323200  | -1.298600 |
| F | -0.150300 | 0.421800  | -2.486000 |
| H | -0.642800 | 3.121900  | 0.828300  |
| H | -2.464800 | -0.305700 | -1.999400 |
| H | -4.919800 | -0.169900 | -2.095200 |
| H | -6.202600 | 0.617200  | -0.131100 |
| H | -5.028800 | 1.282000  | 1.942700  |
| H | -2.564300 | 1.171800  | 2.060400  |

**Total Energy: - 1373.61255313 Hartrees**

Compound [1-H]

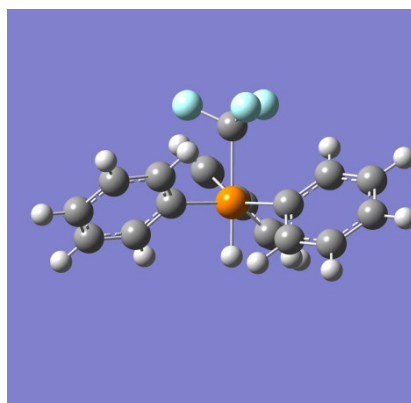

|   |           |           |           |
|---|-----------|-----------|-----------|
| P | 1.206700  | 0.925200  | -0.079300 |
| H | 1.074800  | 0.820800  | 1.369500  |
| C | 0.289000  | 2.514500  | -0.045300 |
| C | -0.874500 | 2.549100  | 0.724200  |
| C | 0.736400  | 3.670400  | -0.684000 |
| C | -1.609000 | 3.724200  | 0.825200  |
| H | -1.204900 | 1.654700  | 1.244200  |
| C | 0.017500  | 4.853900  | -0.549700 |
| H | 1.641300  | 3.657700  | -1.279000 |
| C | -1.158600 | 4.879500  | 0.192700  |
| H | -2.522800 | 3.741000  | 1.406800  |
| H | 0.375400  | 5.755600  | -1.031800 |
| H | -1.721200 | 5.801100  | 0.282700  |
| C | 3.034900  | 0.919000  | 0.093200  |
| C | 3.881600  | 0.133100  | -0.688500 |
| C | 3.565300  | 1.707900  | 1.114900  |
| C | 5.251300  | 0.142000  | -0.445000 |
| H | 3.483300  | -0.490000 | -1.479300 |
| C | 4.937500  | 1.741700  | 1.330700  |



|   |           |           |           |
|---|-----------|-----------|-----------|
| H | 2.902900  | 2.298600  | 1.740700  |
| C | 5.780800  | 0.952000  | 0.554200  |
| H | 5.904400  | -0.482300 | -1.042700 |
| H | 5.345800  | 2.373500  | 2.110000  |
| H | 6.849500  | 0.964800  | 0.731300  |
| C | 0.283800  | -0.650800 | -0.269700 |
| C | -0.773100 | -0.815300 | -1.164600 |
| C | 0.635200  | -1.691600 | 0.590900  |
| C | -1.470000 | -2.018900 | -1.195300 |
| C | -0.040100 | -2.904600 | 0.531400  |
| C | -1.098700 | -3.065600 | -0.358000 |
| C | 1.392200  | 1.076200  | -2.138800 |
| F | 1.638600  | -0.108900 | -2.758600 |
| F | 0.281900  | 1.566000  | -2.752400 |
| F | 2.400200  | 1.896000  | -2.540300 |
| H | -1.062600 | -0.012200 | -1.830400 |
| H | -2.301300 | -2.138200 | -1.879500 |
| H | -1.637500 | -4.004900 | -0.394100 |
| H | 0.249800  | -3.716800 | 1.186800  |
| H | 1.437700  | -1.551200 | 1.308900  |

**Total Energy: - 1374.33437839 Hartrees**

Compound [2]<sup>+</sup>

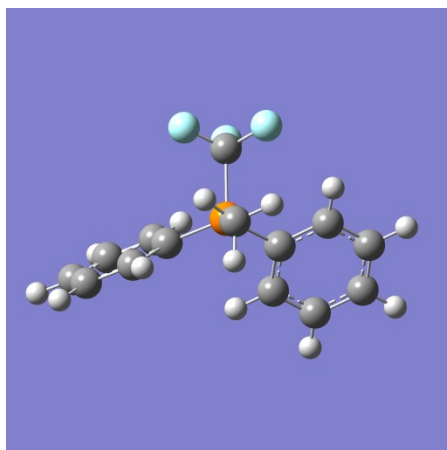

|   |           |           |           |
|---|-----------|-----------|-----------|
| P | -0.605400 | 0.304500  | 0.125300  |
| C | 0.033600  | -1.358900 | -0.040400 |
| C | -0.806900 | -2.449400 | 0.197400  |
| C | 1.387800  | -1.542500 | -0.344200 |
| C | -0.282900 | -3.733900 | 0.123300  |
| H | -1.852200 | -2.301000 | 0.440500  |
| C | 1.893000  | -2.831700 | -0.419000 |
| H | 2.042300  | -0.698400 | -0.526500 |
| C | 1.059800  | -3.922700 | -0.185300 |
| H | -0.926000 | -4.584600 | 0.308400  |

|   |           |           |           |
|---|-----------|-----------|-----------|
| H | 2.937500  | -2.984000 | -0.658300 |
| H | 1.461800  | -4.926700 | -0.243200 |
| C | -2.388000 | 0.363300  | 0.111900  |
| C | -3.077200 | 0.976300  | 1.160600  |
| C | -3.072400 | -0.201900 | -0.972100 |
| C | -4.465100 | 1.022600  | 1.120300  |
| C | -4.457300 | -0.143600 | -0.998100 |
| C | -5.149800 | 0.466400  | 0.045600  |
| C | -0.050400 | 1.265100  | -1.397500 |
| F | -0.622200 | 2.462700  | -1.397400 |
| F | 1.272400  | 1.427100  | -1.380600 |
| F | -0.387600 | 0.624400  | -2.509600 |
| H | -2.536900 | -0.683100 | -1.783000 |
| H | -4.995100 | -0.576000 | -1.831800 |
| H | -6.231600 | 0.506800  | 0.019200  |
| H | -5.007600 | 1.495400  | 1.928600  |
| H | -2.548800 | 1.413300  | 1.999100  |
| C | 0.135600  | 1.192200  | 1.500200  |
| H | -0.169900 | 2.238800  | 1.478300  |
| H | -0.172800 | 0.720000  | 2.433400  |
| H | 1.219900  | 1.120300  | 1.402700  |

**Total Energy: -1181.91022653 Hartrees**

Compound [2-H]

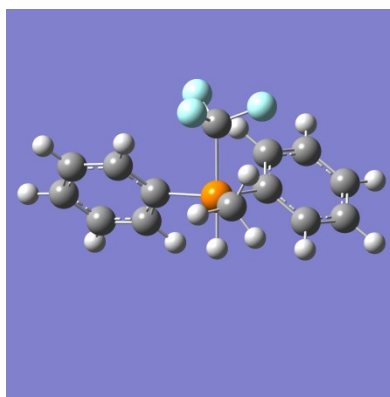

|   |           |          |           |
|---|-----------|----------|-----------|
| P | -1.977200 | 0.398200 | -0.231100 |
| H | -2.076700 | 0.131200 | 1.201300  |
| C | -2.857200 | 1.993800 | -0.011100 |
| C | -3.988000 | 1.991900 | 0.806700  |
| C | -2.404100 | 3.191300 | -0.563600 |
| C | -4.687400 | 3.170600 | 1.036000  |
| H | -4.322500 | 1.068000 | 1.268500  |
| C | -3.087600 | 4.375200 | -0.304700 |
| H | -1.519700 | 3.208700 | -1.188200 |
| C | -4.233600 | 4.364900 | 0.483500  |

|   |           |           |           |
|---|-----------|-----------|-----------|
| H | -5.576500 | 3.159000  | 1.654900  |
| H | -2.723800 | 5.306100  | -0.722900 |
| H | -4.768700 | 5.287500  | 0.674000  |
| C | -0.142300 | 0.415700  | -0.086100 |
| C | 0.729000  | -0.189900 | -0.991700 |
| C | 0.372800  | 1.063100  | 1.038800  |
| C | 2.101500  | -0.150500 | -0.764500 |
| H | 0.351400  | -0.698800 | -1.868600 |
| C | 1.745200  | 1.134200  | 1.242000  |
| H | -0.306100 | 1.513000  | 1.757300  |
| C | 2.611200  | 0.518800  | 0.342500  |
| H | 2.772800  | -0.638600 | -1.460800 |
| H | 2.136900  | 1.656200  | 2.106700  |
| H | 3.681300  | 0.558200  | 0.506900  |
| C | -1.851600 | 0.720500  | -2.260900 |
| F | -1.568500 | -0.427000 | -2.948000 |
| F | -3.038100 | 1.136700  | -2.770700 |
| F | -0.931800 | 1.618000  | -2.696100 |
| C | -2.990300 | -1.090300 | -0.605500 |
| H | -2.320600 | -1.953100 | -0.580000 |
| H | -3.725200 | -1.201400 | 0.190800  |
| H | -3.476400 | -1.041500 | -1.576900 |

**Total Energy: - 1182.63155661 Hartrees**

Compound [3]<sup>+</sup>

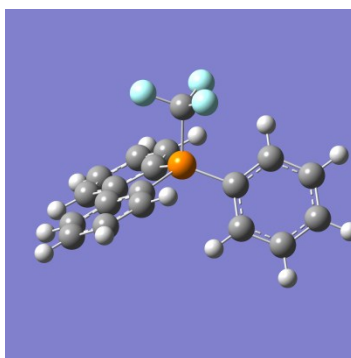

|   |           |           |           |
|---|-----------|-----------|-----------|
| C | -1.017600 | -6.161400 | -0.095700 |
| C | 0.338200  | -6.412800 | -0.293300 |
| C | 1.247800  | -5.360400 | -0.328400 |
| C | 0.756500  | -4.072300 | -0.162500 |
| C | -0.610300 | -3.800500 | 0.033100  |
| C | -1.500800 | -4.864300 | 0.067000  |
| H | -1.713200 | -6.991000 | -0.070100 |
| H | 0.688500  | -7.428700 | -0.419500 |
| H | 2.304300  | -5.546100 | -0.482100 |
| H | -2.559800 | -4.694100 | 0.216300  |

|   |           |           |           |
|---|-----------|-----------|-----------|
| C | 0.191200  | -1.511500 | 0.090400  |
| C | 0.093300  | -0.130800 | 0.185200  |
| C | -1.170600 | 0.419600  | 0.377700  |
| C | -2.289100 | -0.405400 | 0.467000  |
| C | -2.179900 | -1.791100 | 0.365500  |
| C | -0.928500 | -2.359500 | 0.173300  |
| H | 0.967900  | 0.504000  | 0.111000  |
| H | -1.282000 | 1.493300  | 0.455600  |
| H | -3.266000 | 0.038000  | 0.615500  |
| H | -3.064500 | -2.412000 | 0.433800  |
| C | 2.665800  | -2.414200 | 1.441300  |
| C | 2.739200  | -2.216400 | -1.511100 |
| C | 2.490600  | -2.877200 | -2.718300 |
| C | 3.787500  | -1.298300 | -1.386800 |
| C | 3.305400  | -2.611100 | -3.810100 |
| H | 1.678500  | -3.590100 | -2.804200 |
| C | 4.590900  | -1.045500 | -2.489100 |
| H | 3.982100  | -0.787400 | -0.451900 |
| C | 4.349300  | -1.698300 | -3.694700 |
| H | 3.125100  | -3.118800 | -4.748800 |
| H | 5.406600  | -0.339300 | -2.404500 |
| H | 4.981700  | -1.494900 | -4.550100 |
| F | 1.970600  | -2.899200 | 2.457600  |
| F | 2.968100  | -1.142100 | 1.699200  |
| F | 3.792600  | -3.101800 | 1.312000  |
| P | 1.642600  | -2.527100 | -0.139100 |

**Total Energy: - 1372.41673467 Hartrees**

Compound [3-H]

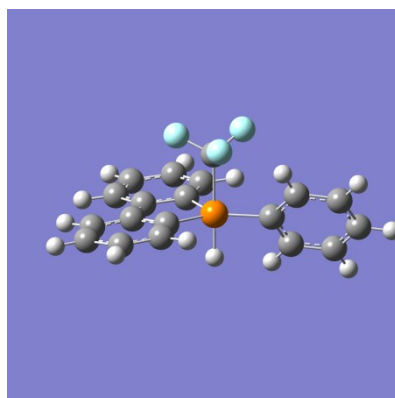

|   |           |           |           |
|---|-----------|-----------|-----------|
| C | -0.903000 | -0.138300 | 0.686600  |
| C | 0.427900  | -0.278900 | 1.075200  |
| C | 1.321000  | 0.777400  | 0.914700  |
| C | 0.861800  | 1.965300  | 0.366100  |
| C | -0.482300 | 2.124000  | -0.023300 |

|   |           |           |           |
|---|-----------|-----------|-----------|
| C | -1.362200 | 1.054900  | 0.140500  |
| H | -1.590400 | -0.965600 | 0.814600  |
| H | 0.770300  | -1.212800 | 1.504200  |
| H | 2.355900  | 0.670600  | 1.218000  |
| H | -2.402000 | 1.151000  | -0.149800 |
| C | 0.256900  | 4.361300  | -0.607500 |
| C | 0.102100  | 5.660700  | -1.065000 |
| C | -1.158200 | 6.073400  | -1.491000 |
| C | -2.233700 | 5.187800  | -1.459000 |
| C | -2.073200 | 3.885200  | -0.998500 |
| C | -0.819800 | 3.457500  | -0.563700 |
| H | 0.944200  | 6.343400  | -1.087900 |
| H | -1.301800 | 7.085700  | -1.848300 |
| H | -3.209400 | 5.518600  | -1.793900 |
| H | -2.923100 | 3.213000  | -0.974600 |
| P | 1.760900  | 3.496100  | -0.077400 |
| C | 3.470100  | 4.214500  | -0.131500 |
| C | 4.323100  | 4.395800  | 0.959900  |
| C | 3.905200  | 4.578900  | -1.408600 |
| C | 5.590400  | 4.934900  | 0.766600  |
| H | 4.022500  | 4.115800  | 1.959000  |
| C | 5.154800  | 5.158700  | -1.590700 |
| H | 3.261600  | 4.409800  | -2.265900 |
| C | 6.003500  | 5.328100  | -0.502100 |
| H | 6.254700  | 5.051800  | 1.614200  |
| H | 5.469300  | 5.461400  | -2.582000 |
| H | 6.987100  | 5.760400  | -0.642400 |
| H | 1.985100  | 2.966700  | -1.420600 |
| C | 1.480800  | 4.146000  | 1.830700  |
| F | 2.140000  | 3.401700  | 2.763900  |
| F | 1.862200  | 5.429000  | 2.038900  |
| F | 0.182700  | 4.092100  | 2.203000  |

**Total Energy: -1373.13599265 Hartrees**

## 6. Hydrodefluorination reactions

**General procedure:** under inert atmosphere, in a J. Young NMR tube the catalyst was dissolved in dried solvent (0.05 mL), followed by the addition of the 1-fluoro-adamantane and  $\text{Et}_3\text{SiH}$ . The system was then sealed and heated at 60°C or 100 °C in an oil bath for 18 hours. Subsequent addition of fluorobenzene (10  $\mu\text{L}$ ) to the reaction mixture allowed the determination of the  $^{19}\text{F}$ -NMR yields based on the relative integral of the fluorine of  $\text{Et}_3\text{SiF}$ .

Table 1. Hydrodefluorination with [1][OTf] and [1][BArF].

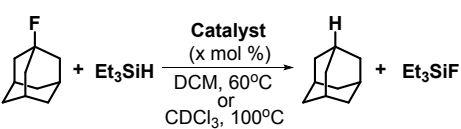

Reaction scheme: 1-fluoro-adamantane +  $\text{Et}_3\text{SiH}$   $\xrightarrow[\text{DCM, 60}^\circ\text{C or CDCl}_3, 100^\circ\text{C}]{\text{Catalyst (x mol \%)}}$  Adamantane +  $\text{Et}_3\text{SiF}$

| Entry | Catalyst  | Eq. Silane | Catalyst loading | Temp. (°C) | Conv. (%) | $\text{Et}_3\text{SiF}$ (%) |
|-------|-----------|------------|------------------|------------|-----------|-----------------------------|
| 1     | [1][OTf]  | 1.2        | 5 mol %          | 60         | 31        | 29                          |
| 2     | [1][BArF] | 1.2        | 5 mol %          | 60         | 39        | 35                          |
| 3     | [1][OTf]  | 2.2        | 10 mol %         | 100        | 70        | 60                          |
| 4     | [1][BArF] | 2.2        | 10 mol %         | 100        | 99        | 97                          |

To avoid showing similar spectra multiple times, for each catalyst one result is reported.

**Entry 3:** 1-fluoro-adamantane (20 mg, 0.13 mmol, 1.0 eq.), Et<sub>3</sub>SiH (46 μL, 0.28 mmol, 2.2 eq.), [1][OTf] (6 mg, 0.01 mmol, 0.05 eq.). After 18 hours at 100°C, Et<sub>3</sub>SiF was found as main product (catalyst decomposition noted as well). Et<sub>3</sub>SiF NMR yield = 60%. <sup>19</sup>F{<sup>1</sup>H} NMR (376 MHz, CHCl<sub>3</sub>): δ -177 ppm (s, 1F). <sup>1</sup>H NMR and <sup>19</sup>F{<sup>1</sup>H} NMR spectra are in agreement with those reported in the literature.<sup>1</sup>

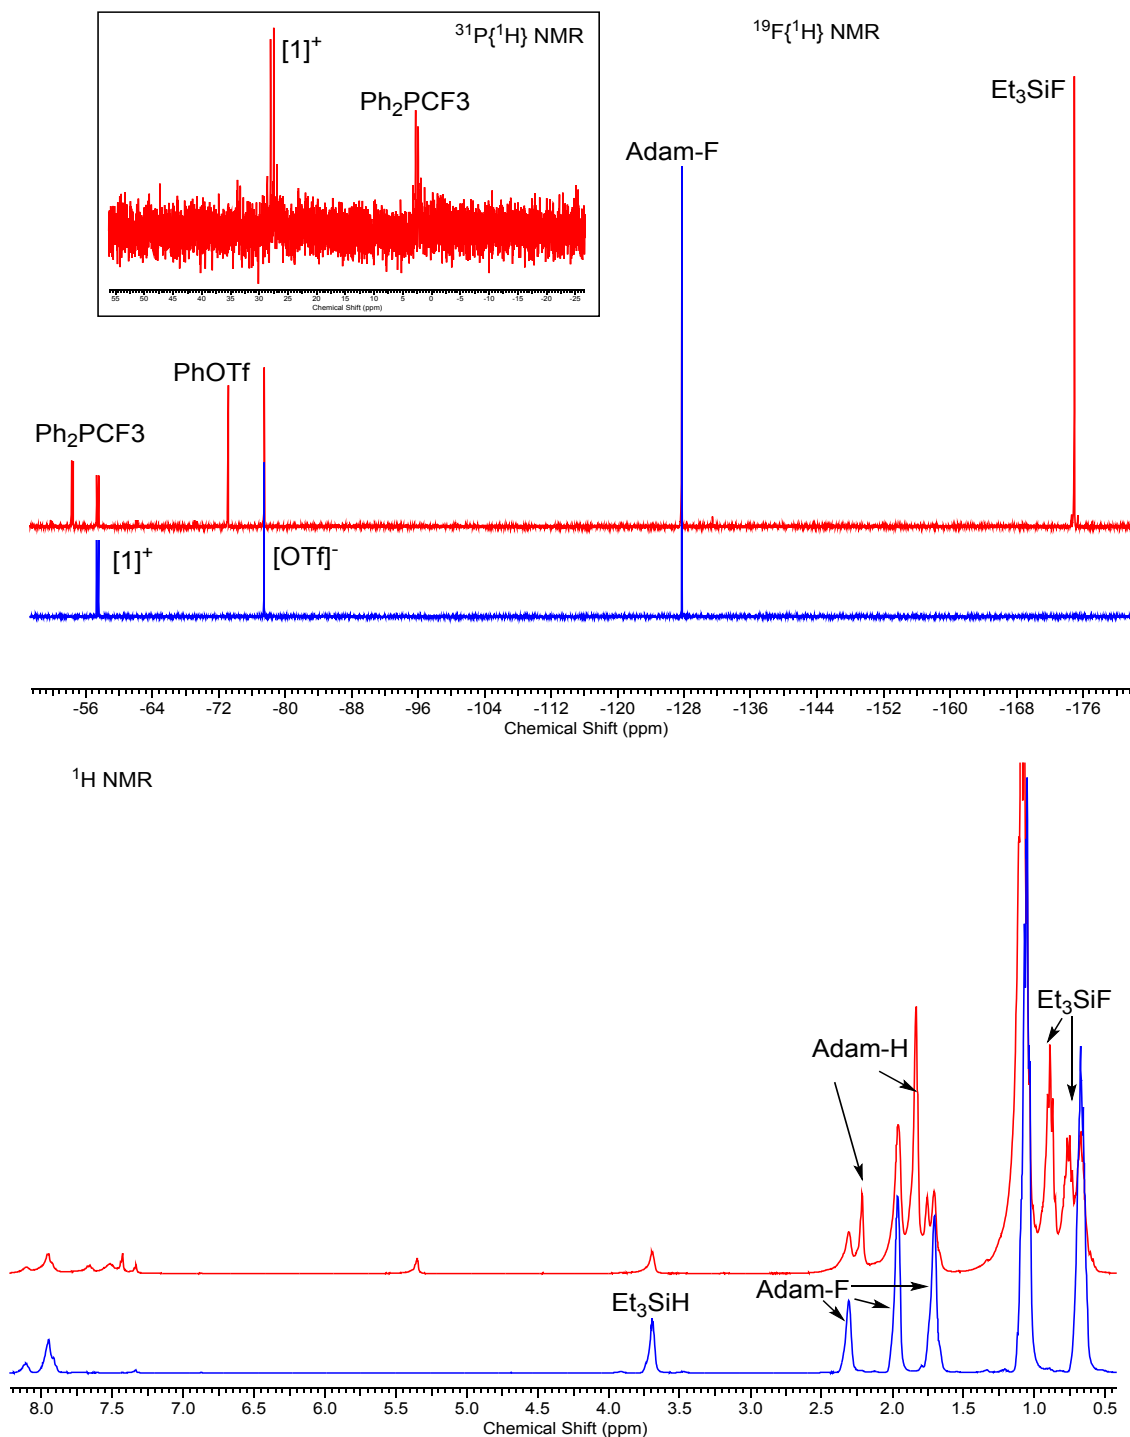

**Figure S28.** <sup>19</sup>F{<sup>1</sup>H}-NMR, <sup>31</sup>P{<sup>1</sup>H} and <sup>1</sup>H NMR spectra of the reduction of 1-fluoroadamantane with Et<sub>3</sub>SiH with [1][OTf] in dried CDCl<sub>3</sub>. Blue (after 5 min), red (after 18 h at 100°C).

**Entry 4:** 1-fluoro-adamantane (20 mg, 0.13 mmol, 1.0 eq.), Et<sub>3</sub>SiH (46 μL, 0.28 mmol, 2.2 eq.), [1][BArF] (13 mg, 0.01 mmol, 0.05 eq.). After 18 hours at 100°C, full conversion to Et<sub>3</sub>SiF was observed (catalyst decomposition noted as well). Et<sub>3</sub>SiF NMR yield = 97%. <sup>19</sup>F{<sup>1</sup>H} NMR (376 MHz, CHCl<sub>3</sub>): δ -177 ppm (s, 1F). The results are in agreement with those reported in the literature.<sup>1</sup>

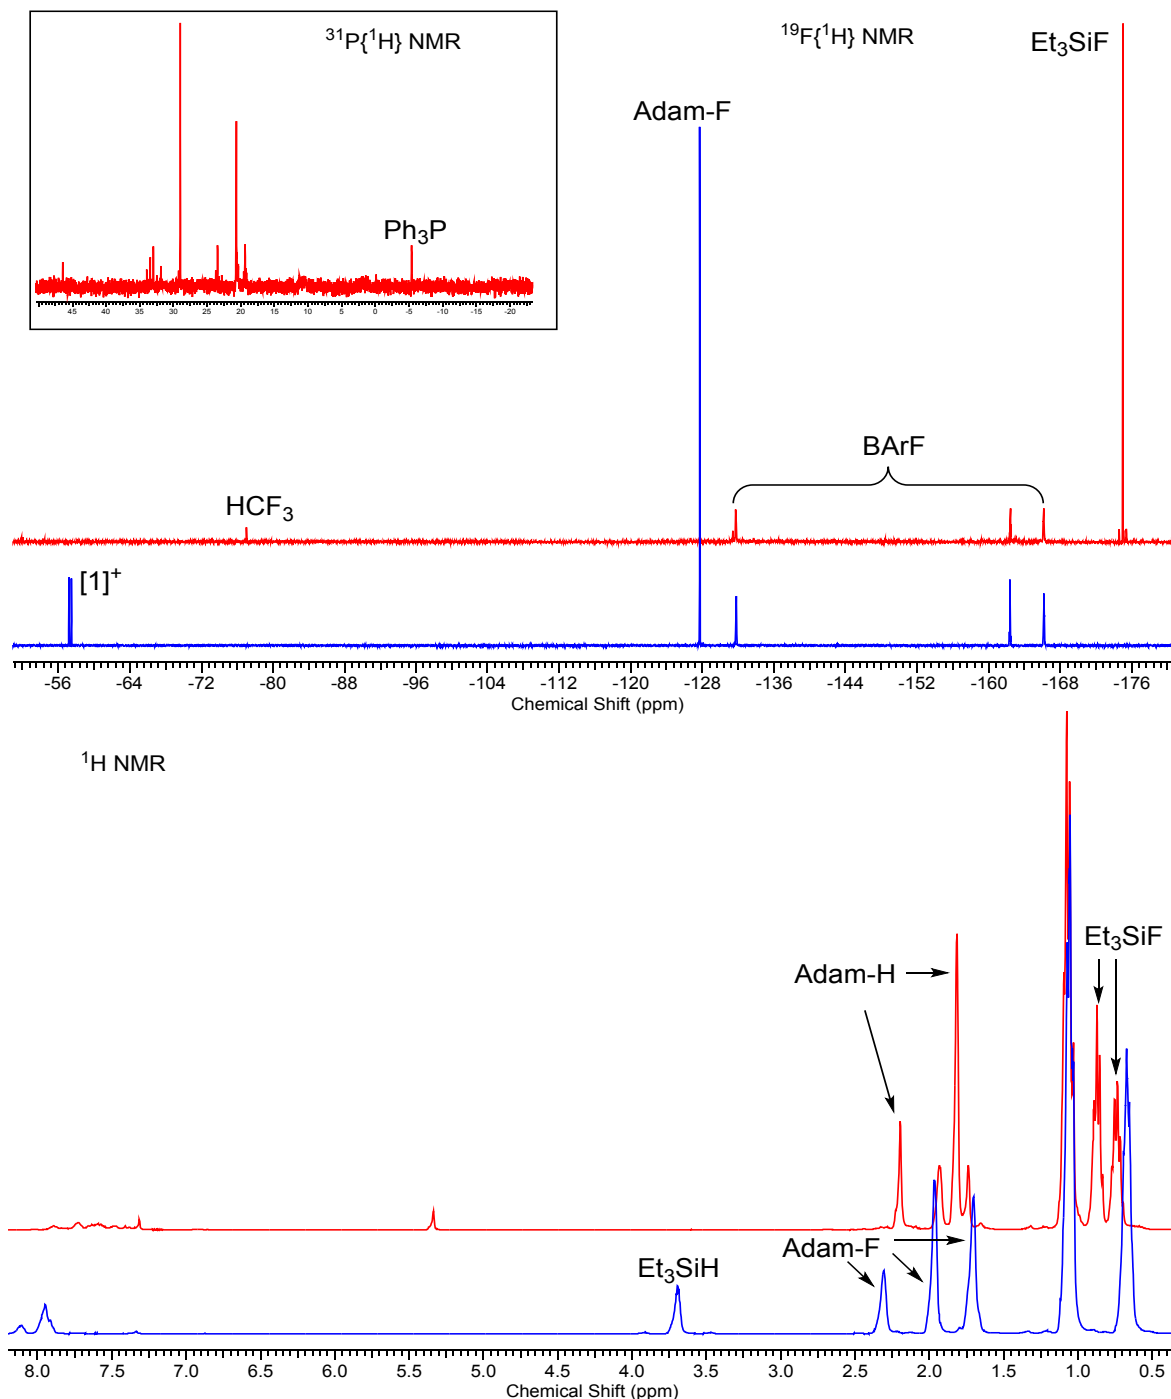

**Figure S29.** <sup>19</sup>F{<sup>1</sup>H}-NMR, <sup>31</sup>P{<sup>1</sup>H} and <sup>1</sup>H NMR spectra of the reduction of 1-fluoro-adamantane with Et<sub>3</sub>SiH with [1][BArF] in dried CDCl<sub>3</sub>. Blue (after 5 min), red (after 18 h at 100°C).



**Reaction under ambient conditions:** the reaction in entry 4 was repeated under ambient conditions using  $\text{CDCl}_3$  straight from the Winchester. After 18 hours at  $100^\circ\text{C}$ , good conversion to  $\text{Et}_3\text{SiF}$  was observed. As for the reaction under anhydrous conditions, catalyst decomposition was noted as well.  $\text{Et}_3\text{SiF}$  NMR yield = 76%.

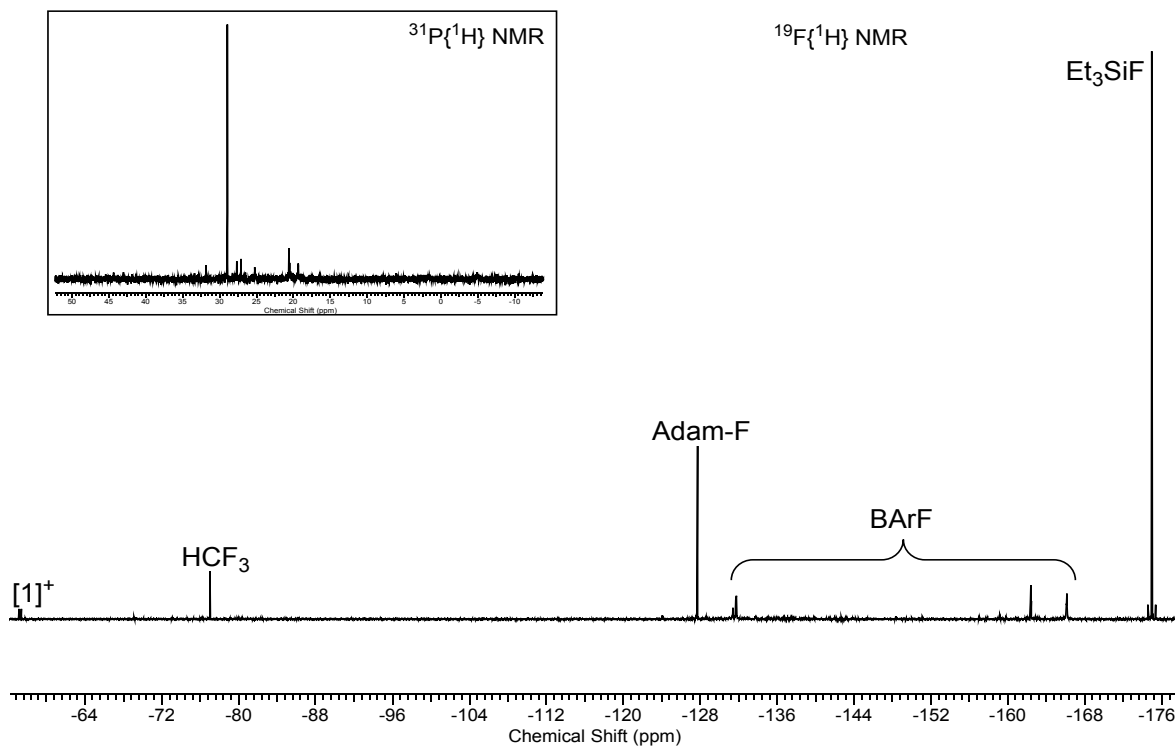

**Figure S30.**  $^{19}\text{F}\{^1\text{H}\}$ -NMR and  $^{31}\text{P}\{^1\text{H}\}$  spectra of the reduction of 1-fluoroadamantane with  $\text{Et}_3\text{SiH}$  with  $[\text{1}][\text{BArF}]$  in wet  $\text{CDCl}_3$  under ambient conditions, after 18 h at  $100^\circ\text{C}$ .

## 7. Dehydrosilylation of alcohols

**General procedure:** under inert atmosphere, in a J. Young NMR tube the catalyst (5 mol %) was dissolved in dried solvent (0.05 mL), followed by the addition of the alcohol and the silane. The system was then sealed and heated at 60°C in an oil bath. Subsequent addition of mesitylene to the reaction mixture allowed the determination of the <sup>1</sup>H-NMR yields based on the relative integral of the benzylic protons of the product (when BnOH was used) or of the silicon-attached proton (in case of PhOSi(H)Et<sub>2</sub>).

**Table 2.** Alcohol dehydrosilylation with [2][OTf], [1][OTf] and [1][BArF].

| Entry | Catalyst  | R  | Solvent           | Time (h) | Conv. (%)       |
|-------|-----------|----|-------------------|----------|-----------------|
| 1     | [2][OTf]  | Bn | DCM               | 18       | 0               |
| 2     | [1][OTf]  | Bn | DCM               | 2        | 90              |
| 3     | [1][BArF] | Bn | DCM               | 2        | 90 <sup>a</sup> |
| 4     | [2][OTf]  | Ph | CDCl <sub>3</sub> | 18       | 19              |
| 5     | [1][OTf]  | Ph | CDCl <sub>3</sub> | 2        | 94              |
| 6     | [1][BArF] | Ph | CDCl <sub>3</sub> | 4        | 78              |

<sup>a</sup>Product further reacted to give Bn<sub>2</sub>O and siloxane.

To avoid showing similar spectra multiple times, for each substrate one result is reported.

**Entry 2:** BnOH (25  $\mu$ L, 0.24 mmol, 1.0 eq.), Et<sub>2</sub>SiH<sub>2</sub> (45  $\mu$ L, 0.28 mmol, 1.2 eq.), [1][OTf] (6 mg, 0.02 mmol, 0.05 eq.). After 2 hours at 60°C, BnOSi(H)Et<sub>2</sub> was found as the main product (NMR yield = 90%). Diagnostic peaks: <sup>1</sup>H NMR (400 MHz, CHCl<sub>2</sub>):  $\delta$  4.75 (s, 2H, Bn.), 4.50 (quint, *J* = 2.1 Hz, Si-H) ppm. <sup>29</sup>Si{<sup>1</sup>H} NMR (79 MHz, CHCl<sub>2</sub>):  $\delta$  12.8 ppm. The results are in agreement with those reported in the literature.<sup>12</sup>

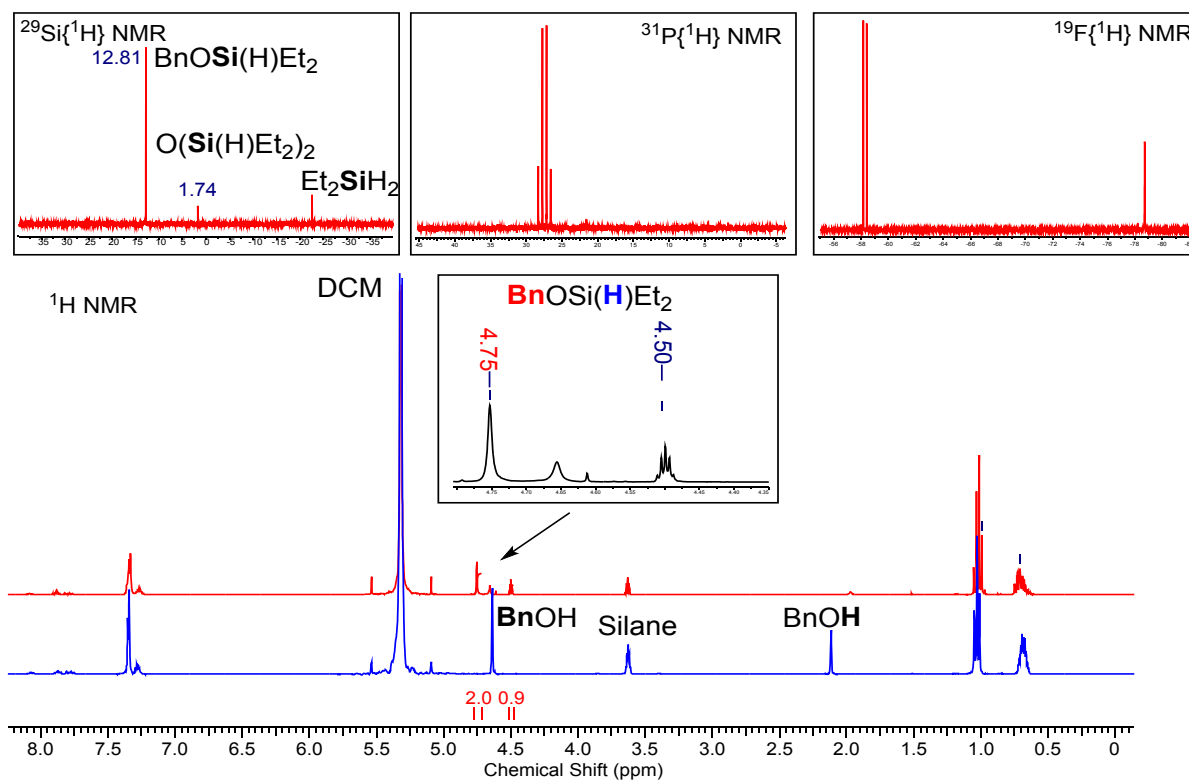

**Figure S31.** <sup>1</sup>H, <sup>29</sup>Si{<sup>1</sup>H}, <sup>31</sup>P{<sup>1</sup>H} and <sup>19</sup>F{<sup>1</sup>H}-NMR spectra of the dehydrosilylation of BnOH with Et<sub>2</sub>SiH<sub>2</sub> with [1][OTf] in dried DCM. Blue (after 5 min), red (after 2 h at 60°C).

**Entry 6:** PhOH (20 mg, 0.20 mmol, 1.0 eq.), Et<sub>2</sub>SiH<sub>2</sub> (32 μL, 0.25 mmol, 1.2 eq.), **[1][BARF]** (10 mg, 0.01 mmol, 0.05 eq.). After 4 hours at 60°C, PhOSi(H)Et<sub>2</sub> was found as the main product (NMR yield = 78%). Diagnostic peaks: <sup>1</sup>H NMR (400 MHz, CHCl<sub>3</sub>): δ 4.68 (quint, *J* = 2.1 Hz, Si-H) ppm. <sup>29</sup>Si{<sup>1</sup>H} NMR (79 MHz, CHCl<sub>3</sub>): δ 10.3 ppm. The results are in agreement with those reported in the literature.<sup>13</sup>

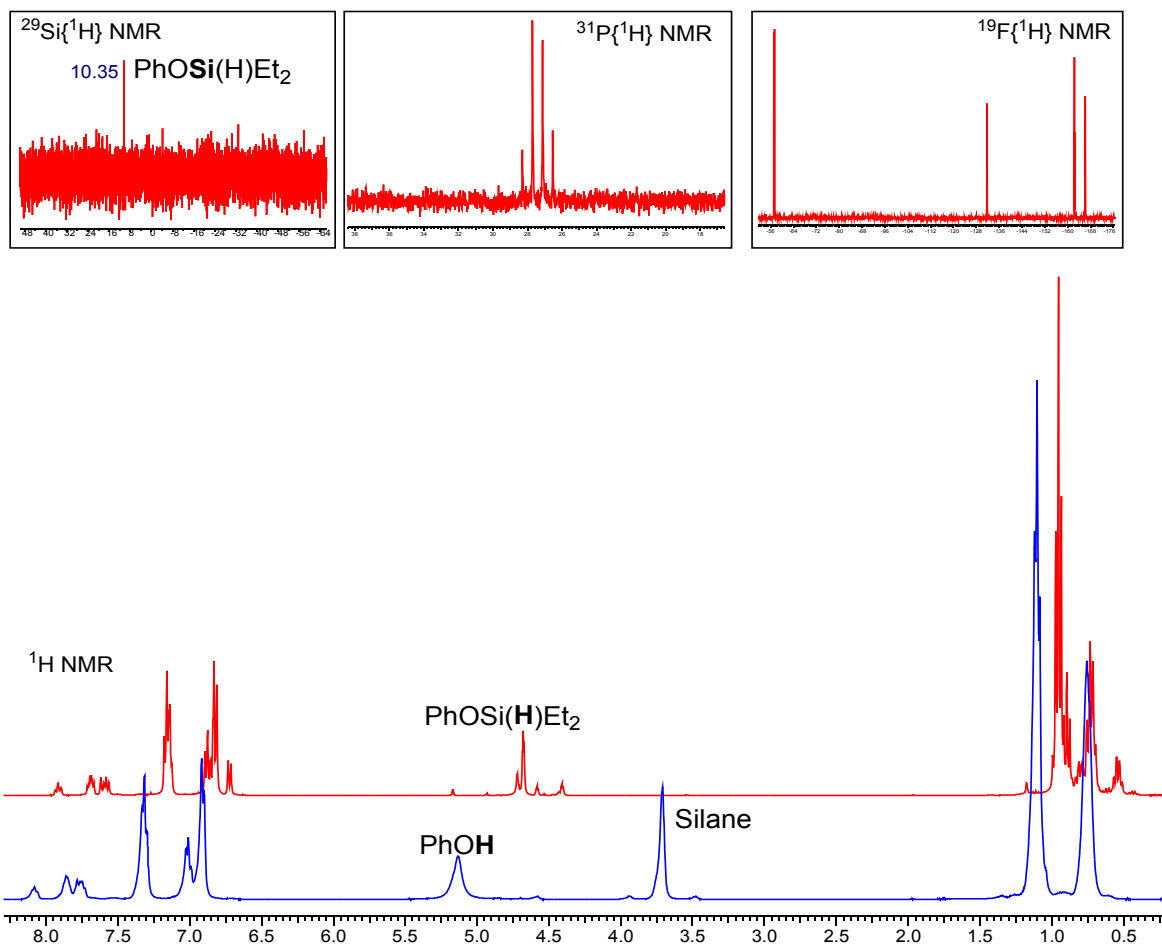

**Figure S32.** <sup>1</sup>H, <sup>29</sup>Si{<sup>1</sup>H}, <sup>31</sup>P{<sup>1</sup>H} and <sup>19</sup>F{<sup>1</sup>H}-NMR spectra of the dehydrosilylation of PhOH with Et<sub>2</sub>SiH<sub>2</sub> with **[1][BARF]** in dried CDCl<sub>3</sub>. Blue (after 5 min), red (after 2 h at 60°C).

**Reaction under ambient conditions (PhOH):** the reaction in entry 5 was repeated under ambient conditions using  $\text{CDCl}_3$  straight from the Winchester. No decomposition was observed after 2 h at  $60^\circ\text{C}$ , with  $\text{PhOSi(H)Et}_2$  found as the main product (NMR yield = 78%). Note: water from the unpurified solvent reacts to produce the corresponding siloxane.

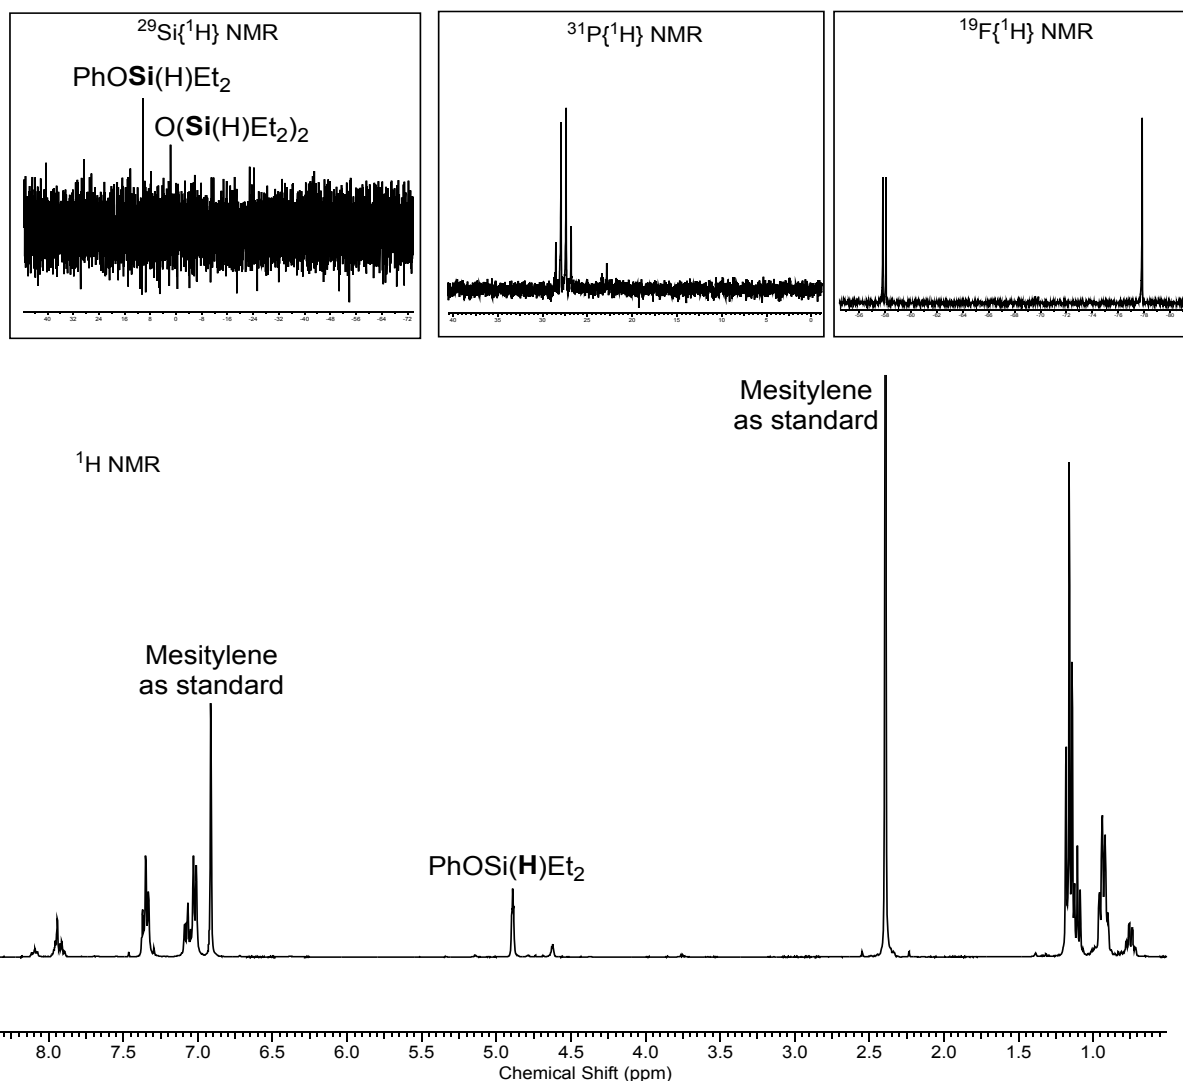

**Figure S33.**  $^1\text{H}$ ,  $^{29}\text{Si}\{^1\text{H}\}$ ,  $^{31}\text{P}\{^1\text{H}\}$  and  $^{19}\text{F}\{^1\text{H}\}$ -NMR spectra of the dehydrosilylation of PhOH with  $\text{Et}_2\text{SiH}_2$  with **[1][OTf]** in wet  $\text{CDCl}_3$  under ambient conditions, after 2 h at  $60^\circ\text{C}$ .

## 8. C=O reductions

**General procedure:** under inert atmosphere, in a J. Young NMR tube the catalyst (5 mol %) was dissolved in dried solvent (0.05 mL), followed by the addition of the carbonyl and the silane. The system was then sealed and heated at 60°C or 100 °C in an oil bath. Subsequent addition of mesitylene to the reaction mixture allowed the determination of the <sup>1</sup>H-NMR yields based on the relative integral of the benzylic protons of the product.

**Table 3.** C=O reductions with [1][OTf] and [1][BArF].

| Entry | Catalyst  | R  | Eq. Silane | Temp./Time (°C / h) | Conv. (%)       | A : B : C (%) |
|-------|-----------|----|------------|---------------------|-----------------|---------------|
| 1     | [1][OTf]  | H  | 1.2        | 60 / 1              | 92              | 0 : 0 : 45    |
| 2     | [1][BArF] | H  | 1.2        | 60 / 3              | 89              | 0 : 0 : 44    |
| 3     | [1][OTf]  | Me | 1.2        | 100 / 2             | 0               | -             |
| 4     | [1][BArF] | Me | 1.2        | 100 / 2             | 83 <sup>a</sup> | 21 : 13 : 0   |
| 5     | [1][BArF] | Me | 2.2        | 100 / 4             | 91              | 59 : 15 : 0   |
| 6     | [1][OTf]  | Ph | 2.2        | 100 / 4             | 0               | -             |
| 7     | [1][BArF] | Ph | 2.2        | 100 / 4             | 89              | 50 : 39 : 0   |

<sup>a</sup> Mixture of byproducts including styrene and 1-phenylethanol.

To avoid showing similar spectra multiple times, for each substrate one result is reported.

**Entry 2:** PhCHO (25  $\mu$ L, 0.24 mmol, 1.0 eq.), PhMe<sub>2</sub>SiH (45  $\mu$ L, 0.29 mmol, 1.2 eq.), **[1][BArF]** (12 mg, 0.01 mmol, 0.05 eq.). After 3 hours at 60°C, Bn<sub>2</sub>O was found as the main product upon siloxane loss. Bn<sub>2</sub>O NMR yield = 44% (max 50%). <sup>1</sup>H NMR (400 MHz, CH<sub>2</sub>Cl<sub>2</sub>):  $\delta$  4.58 ppm (s, 4H, Bn-). <sup>29</sup>Si{<sup>1</sup>H} NMR (79 MHz, CH<sub>2</sub>Cl<sub>2</sub>):  $\delta$  -1.13 ppm (siloxane). The results are in agreement with those reported in the literature.<sup>12</sup>

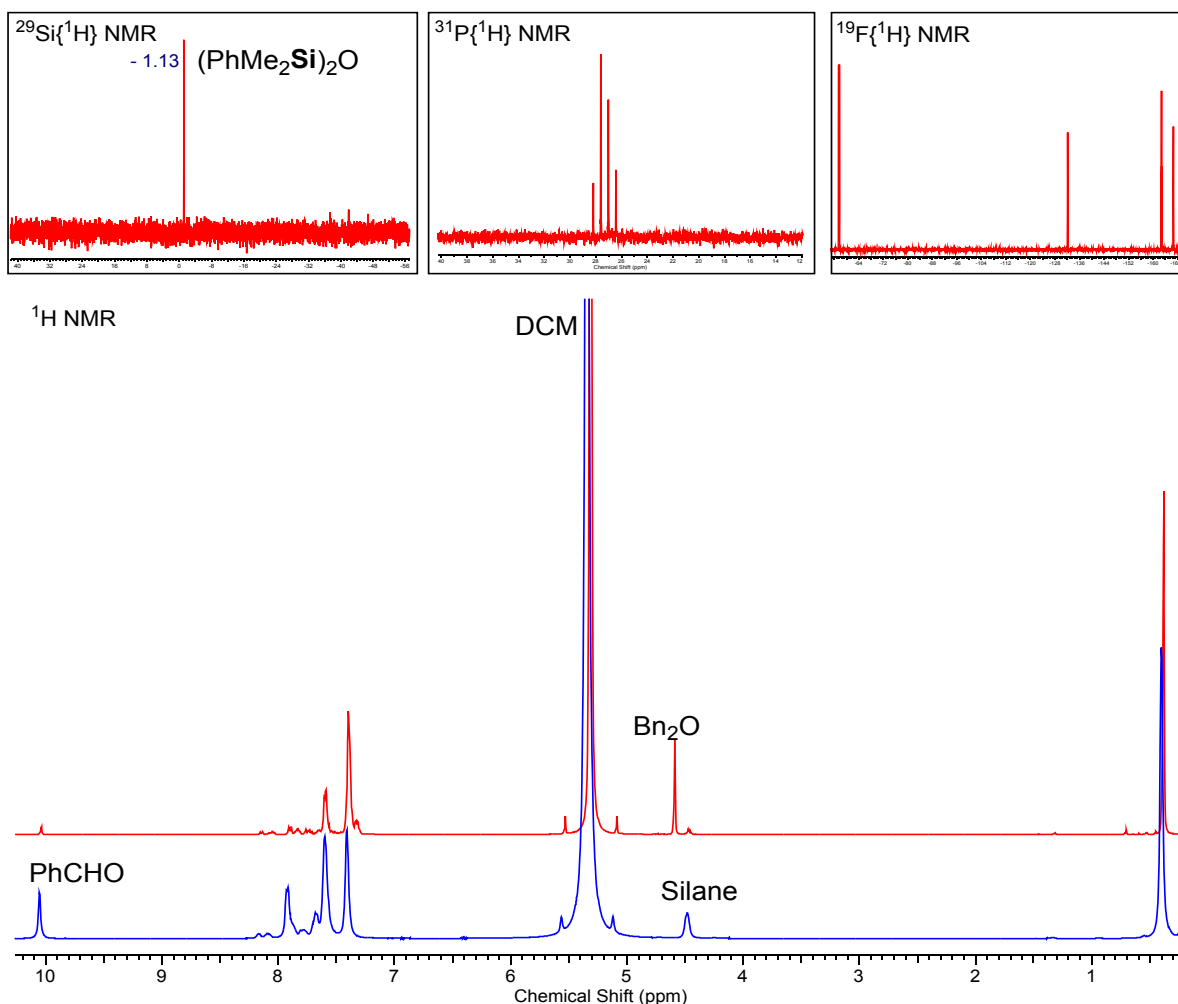

**Figure S34.** <sup>1</sup>H, <sup>29</sup>Si{<sup>1</sup>H}, <sup>31</sup>P{<sup>1</sup>H} and <sup>19</sup>F{<sup>1</sup>H}-NMR spectra of the reduction of PhCHO with PhMe<sub>2</sub>SiH with **[1][BArF]** in dried DCM. Blue (after 5 min), red (after 3 h at 60°C).

**Entry 3:** PhC(O)Me (25  $\mu$ L, 0.21 mmol, 1.0 eq.), PhMe<sub>2</sub>SiH (39  $\mu$ L, 0.25 mmol, 1.2 eq.), **[1][OTf]** (5 mg, 0.01 mmol, 0.05 eq.). After 2 hours at 100°C, minimal reduction was observed, while the catalyst had partially decomposed.

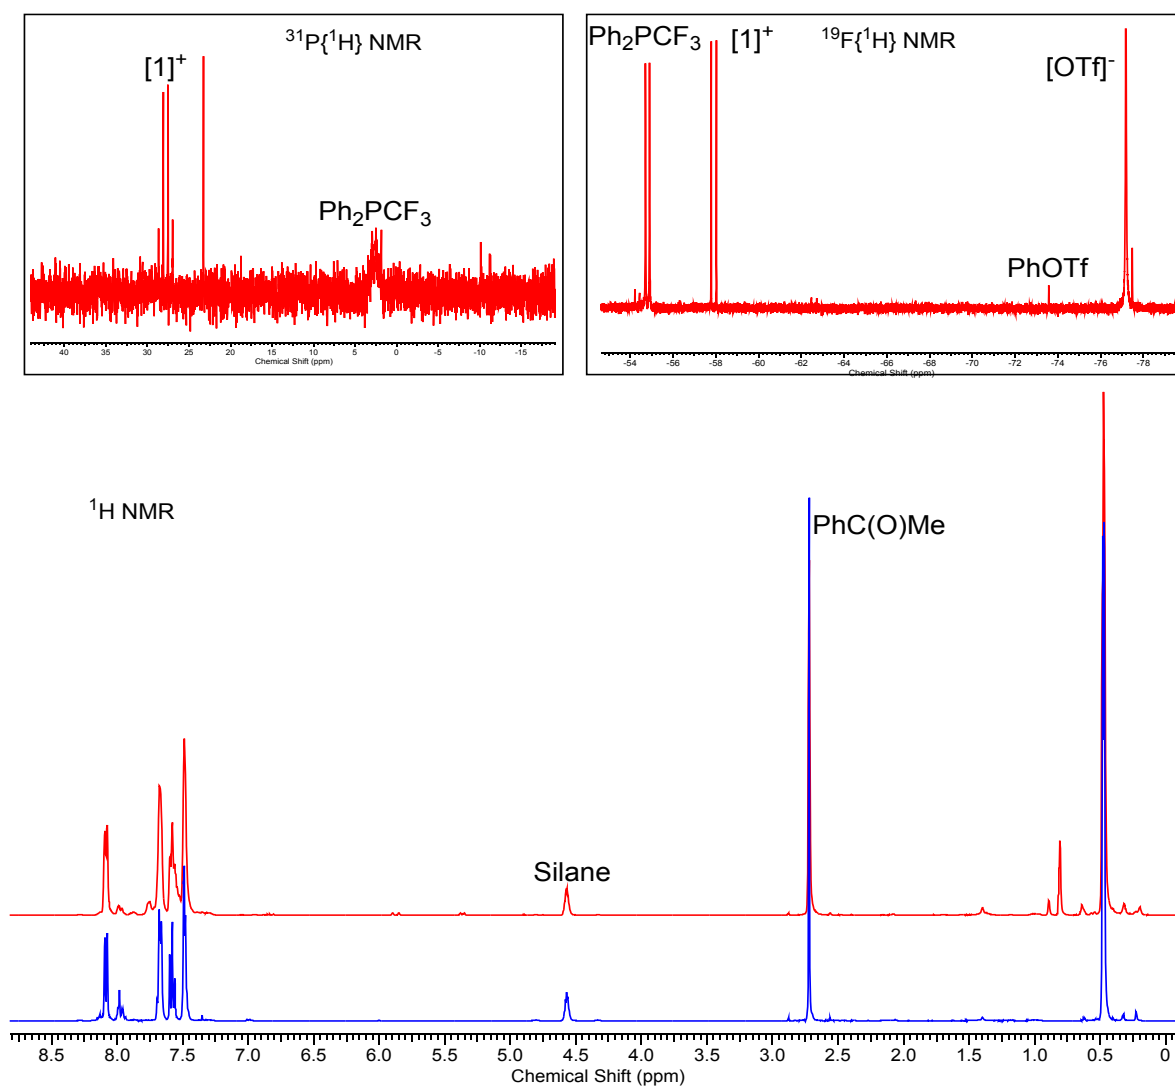

**Figure S35.** <sup>1</sup>H, <sup>31</sup>P{<sup>1</sup>H} and <sup>19</sup>F{<sup>1</sup>H}-NMR spectra of the reduction of PhC(O)Me with PhMe<sub>2</sub>SiH with **[1][OTf]** in dried CHCl<sub>3</sub>. Blue (after 5 min), red (after 2 h at 100°C).



**Entry 5:** PhC(O)Me (12  $\mu$ L, 0.10 mmol, 1.0 eq.), PhMe<sub>2</sub>SiH (35  $\mu$ L, 0.22 mmol, 2.2 eq.), [1][BArF] (5 mg, 0.005 mmol, 0.05 eq.). After 4 hours at 100°C, PhCH(Me)OSiPhMe<sub>2</sub> (NMR yield = 59%) and PhCH<sub>2</sub>Me (NMR yield = 13%) were found as main products. PhCH(Me)OSiPhMe<sub>2</sub> <sup>1</sup>H NMR (400 MHz, CHCl<sub>3</sub>):  $\delta$  4.87 (q,  $J$  = 6.4 Hz, 1H, -CHMe), 1.44 (d,  $J$  = 6.4 Hz, 3H, -CHMe), 0.35 (s, 3H, -SiMe), 0.33 (s, 3H, -SiMe') ppm. PhCH<sub>2</sub>Me <sup>1</sup>H NMR (400 MHz, CHCl<sub>3</sub>):  $\delta$  2.66 (q,  $J$  = 7.6 Hz, 2H, -CH<sub>2</sub>Me), 1.26 (t,  $J$  = 7.6 Hz, 3H, -CH<sub>2</sub>Me) ppm. The results are in agreement with those reported in the literature.<sup>12a,14</sup>

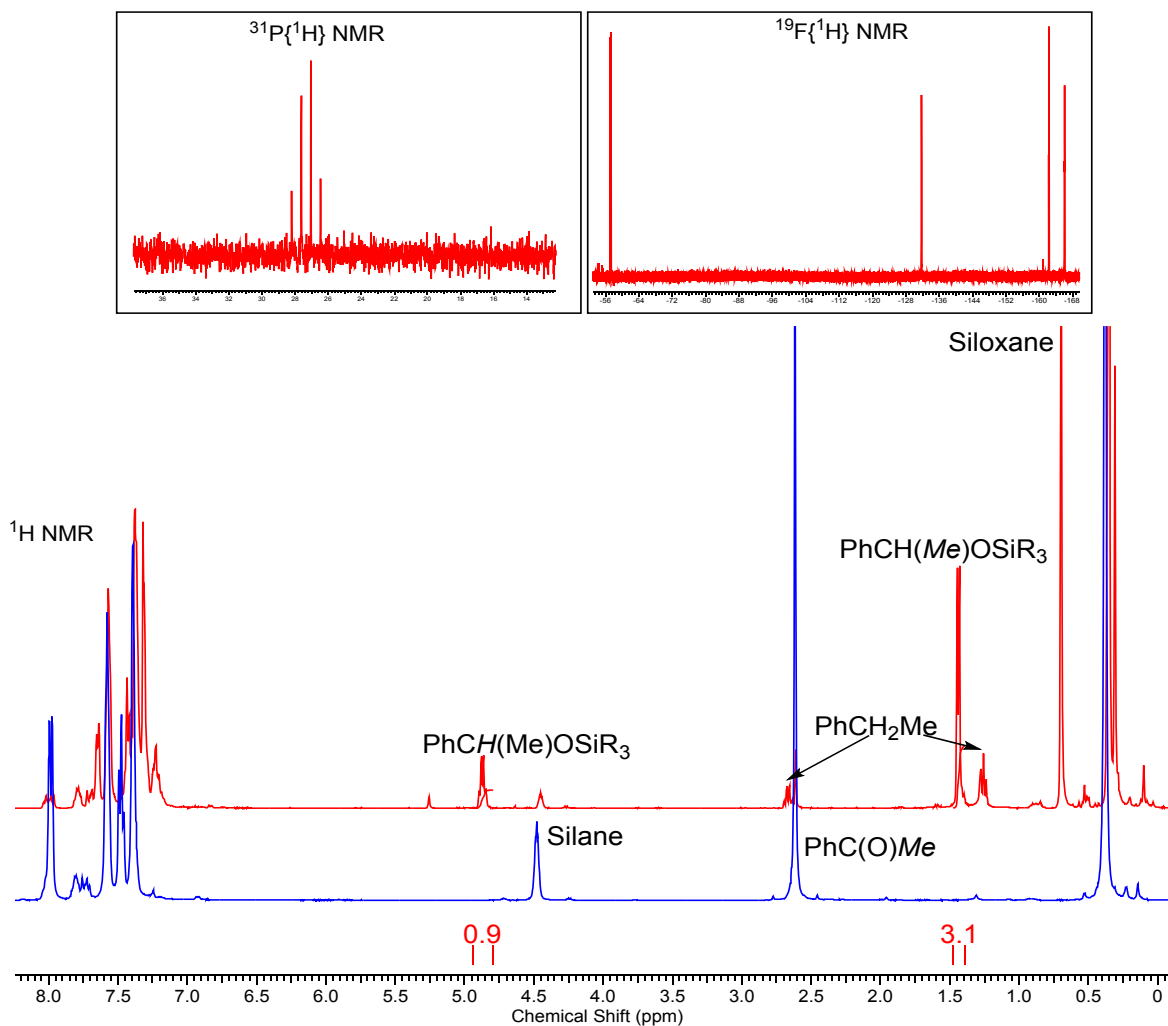

**Figure S36.** <sup>1</sup>H, <sup>31</sup>P{<sup>1</sup>H} and <sup>19</sup>F{<sup>1</sup>H}-NMR spectra of the reduction of PhC(O)Me with PhMe<sub>2</sub>SiH with [1][BArF] in dried CHCl<sub>3</sub>. Blue (after 5 min), red (after 2 h at 100°C).

**Entry 6:** Ph<sub>2</sub>CO (39 mg, 0.21 mmol, 1.0 eq.), PhMe<sub>2</sub>SiH (72 μL, 0.46 mmol, 2.2 eq.), [1][OTf] (5 mg, 0.01 mmol, 0.05 eq.). After 4 hours at 100°C, minimal reduction was observed, while the catalyst had partially decomposed.

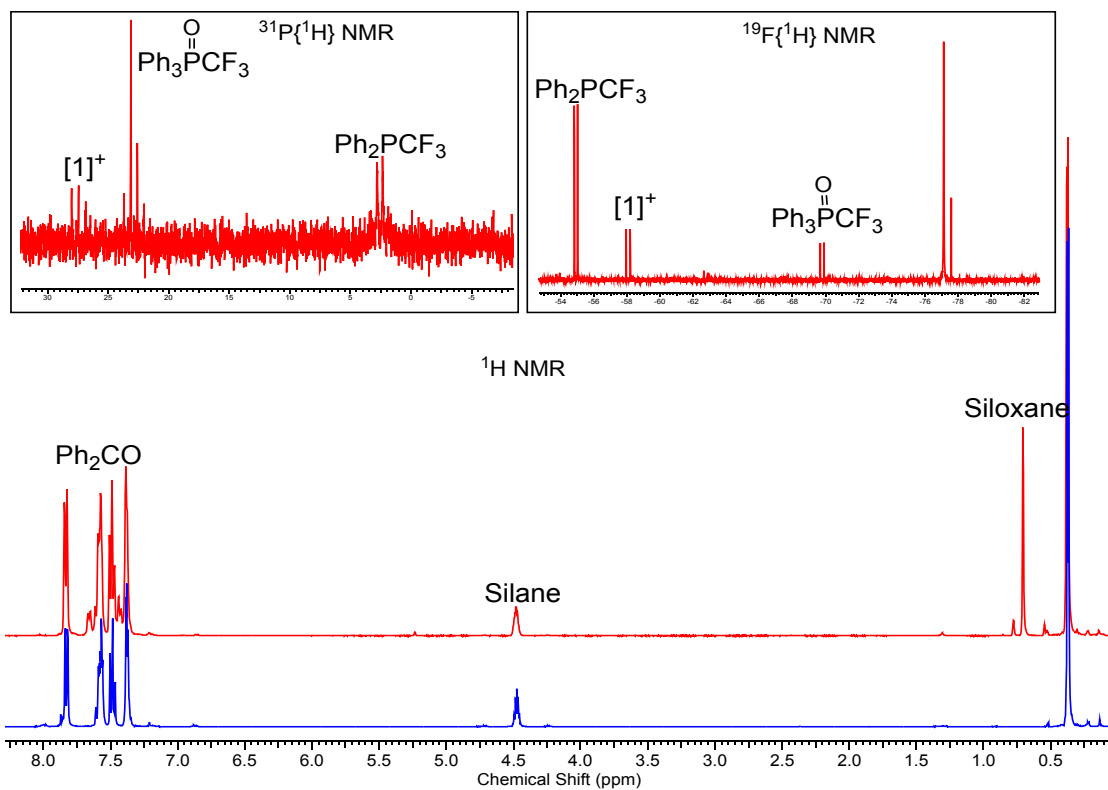

**Figure S37.** <sup>1</sup>H, <sup>31</sup>P{<sup>1</sup>H} and <sup>19</sup>F{<sup>1</sup>H}-NMR spectra of the reduction of Ph<sub>2</sub>CO with PhMe<sub>2</sub>SiH with [1][OTf] in dried CHCl<sub>3</sub>. Blue (after 5 min), red (after 4 h at 100°C).

**Entry 7:** Ph<sub>2</sub>CO (39 mg, 0.21 mmol, 1.0 eq.), PhMe<sub>2</sub>SiH (72 μL, 0.46 mmol, 2.2 eq.), [1][BArF] (11 mg, 0.005 mmol, 0.05 eq.). After 4 hours at 100°C, Ph<sub>2</sub>C(H)OSiPhMe<sub>2</sub> (NMR yield = 50%) and Ph<sub>2</sub>CH<sub>2</sub> (NMR yield = 39%) were found as the main products. Ph<sub>2</sub>C(H)OSiPhMe<sub>2</sub> <sup>1</sup>H NMR (400 MHz, CHCl<sub>3</sub>): δ 5.76 (s, 1H, -CH-), 0.30 (s, 6H, -SiMe<sub>2</sub>) ppm. Ph<sub>2</sub>CH<sub>2</sub> <sup>1</sup>H NMR (400 MHz, CHCl<sub>3</sub>): δ 3.97 ppm (s, 2H, -CH<sub>2</sub>-). The results are in agreements with those reported in the literature.<sup>12a,14</sup>

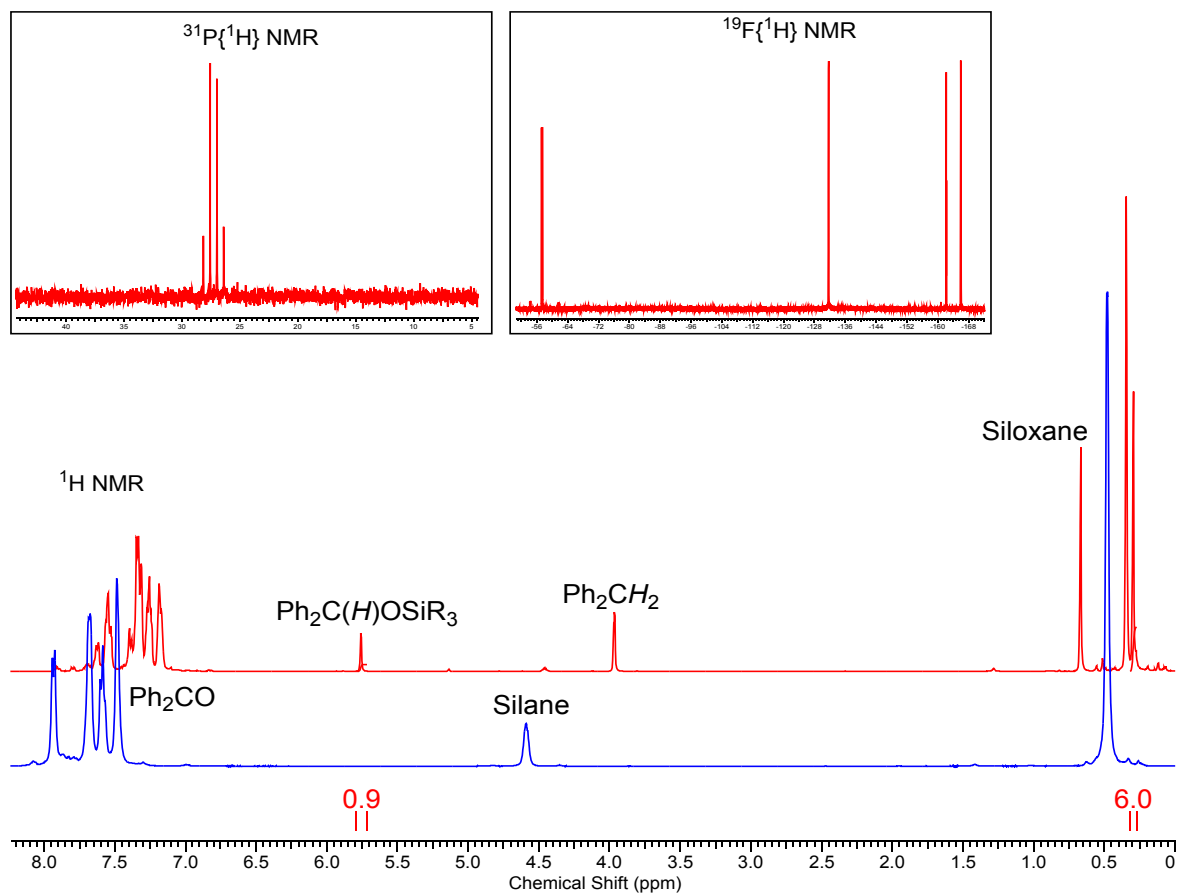

**Figure S38.** <sup>1</sup>H, <sup>31</sup>P{<sup>1</sup>H} and <sup>19</sup>F{<sup>1</sup>H}-NMR spectra of the reduction of Ph<sub>2</sub>CO with PhMe<sub>2</sub>SiH with [1][BArF] in dried CHCl<sub>3</sub>. Blue (after 5 min), red (after 4 h at 100°C).

**Reaction under ambient conditions (PhCHO):** the reaction in entry 2 was repeated under ambient conditions using  $\text{CDCl}_3$  straight from the Winchester. No decomposition was observed after 3 h at  $60^\circ\text{C}$ , with  $\text{Bn}_2\text{O}$  and siloxane found as main products (NMR conversion PhCHO 92%). Note: water from the unpurified solvent reacts to produce the corresponding siloxane.

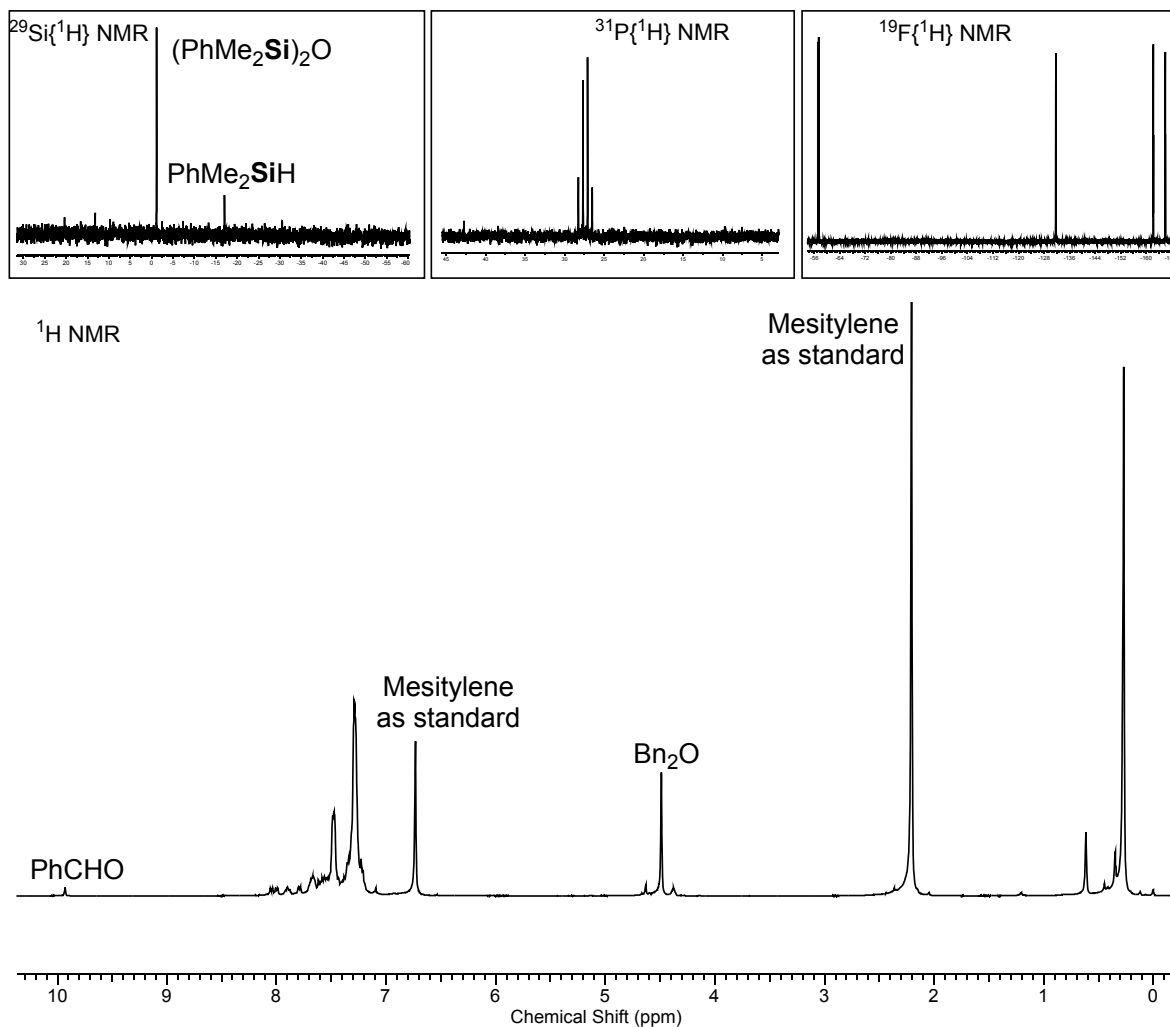

**Figure S39.**  $^1\text{H}$ ,  $^{29}\text{Si}\{^1\text{H}\}$ ,  $^{31}\text{P}\{^1\text{H}\}$  and  $^{19}\text{F}\{^1\text{H}\}$ -NMR spectra of the reduction of PhCHO with  $\text{PhMe}_2\text{SiH}$  and **[1][BARF]** in wet DCM under ambient conditions, after 3 h at  $60^\circ\text{C}$ .

**Reaction under ambient conditions (PhC(O)Me):** the reaction in entry 5 was repeated under ambient conditions using  $\text{CDCl}_3$  straight from the Winchester. No decomposition was observed after 8 h at  $100^\circ\text{C}$ , with the silane completely consumed (NMR conversion PhC(O)Me 80%). Note: water may have caused hydrolysis of the product (e.g. other set of  $-\text{CH}(\text{Me})-$  could be detected).

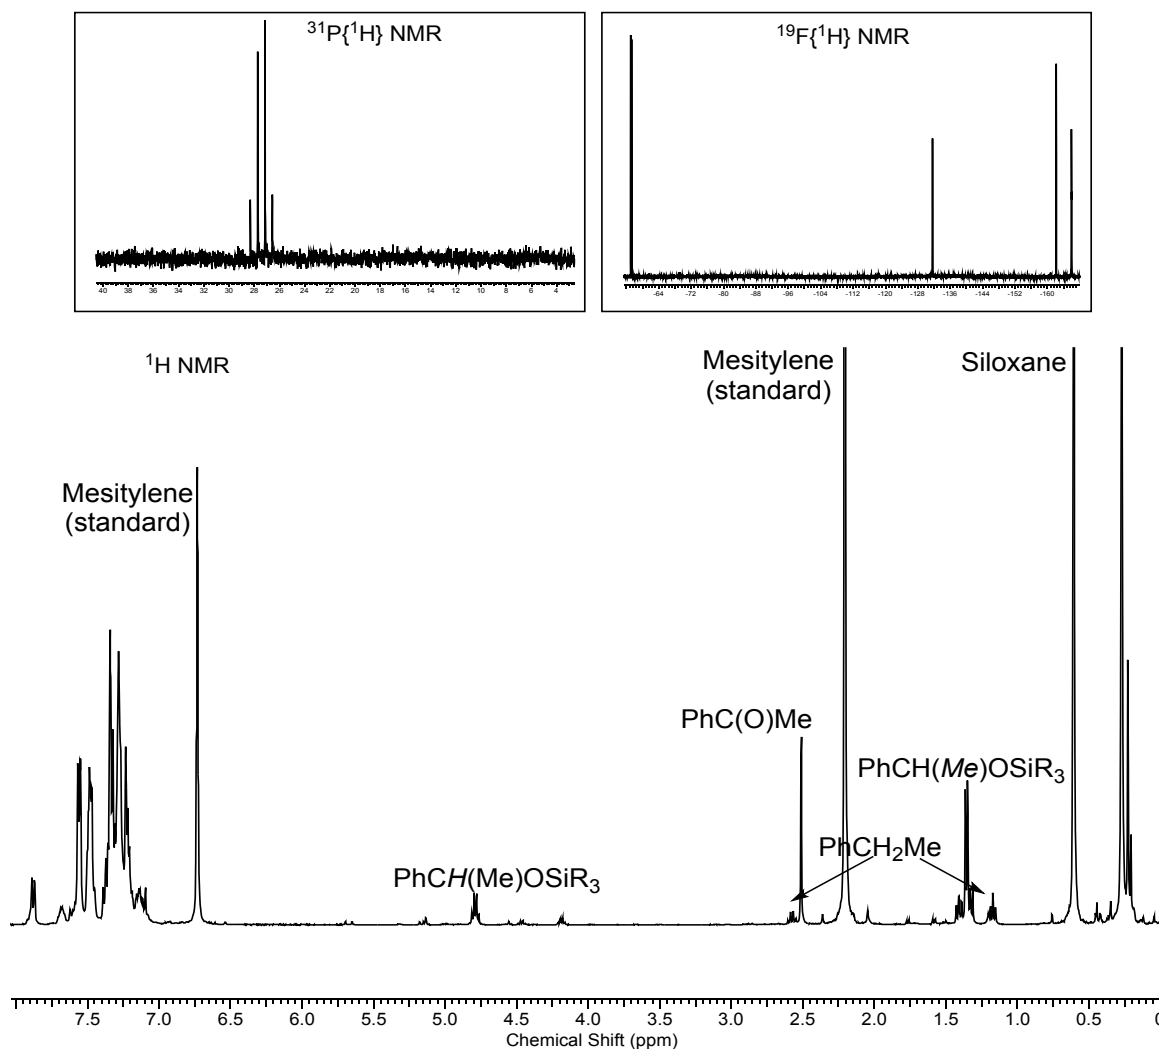

**Figure S40.**  $^1\text{H}$ ,  $^{31}\text{P}\{^1\text{H}\}$  and  $^{19}\text{F}\{^1\text{H}\}$ -NMR spectra of the reduction of PhC(O)Me with  $\text{PhMe}_2\text{SiH}$  and **[1][BArF]** in wet  $\text{CDCl}_3$  under ambient conditions, after 8 h at  $100^\circ\text{C}$ .

**Reaction under ambient conditions ( $\text{Ph}_2\text{CO}$ ):** the reaction in entry 7 was repeated under ambient conditions using  $\text{CDCl}_3$  straight from the Winchester. No decomposition was observed after 8 h at  $100^\circ\text{C}$ , with the silane completely consumed (NMR conversion  $\text{Ph}_2\text{CO}$  70%).

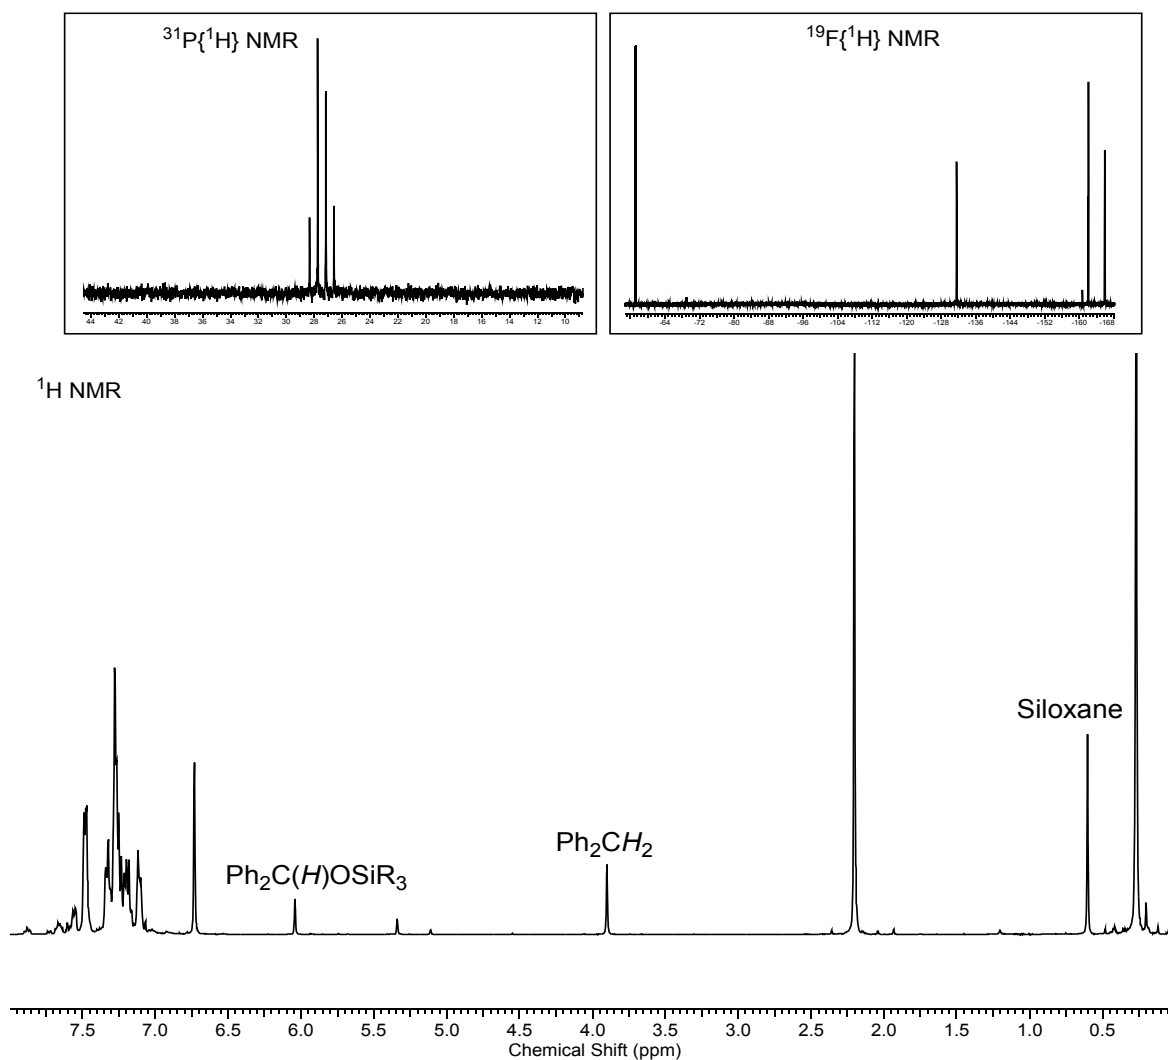

**Figure S41.**  $^1\text{H}$ ,  $^{31}\text{P}\{^1\text{H}\}$  and  $^{19}\text{F}\{^1\text{H}\}$ -NMR spectra of the reduction of  $\text{Ph}_2\text{CO}$  with  $\text{PhMe}_2\text{SiH}$  and **[1][BARF]** in wet  $\text{CDCl}_3$  under ambient conditions, after 8 h at  $100^\circ\text{C}$ .

## 9. Imine reductions

Under inert atmosphere, in a J. Young NMR tube the **[1][BArF]** (5 mg, 0.005 mmol, 0.05 eq.) was dissolved in dried  $\text{CDCl}_3$  (0.05 mL), followed by the addition of the *N*-benzylidene aniline (18 mg, 0.10 mmol, 1.0 eq.) and  $\text{PhMe}_2\text{SiH}$  (19  $\mu\text{L}$ , 0.12 mmol, 1.2 eq.). The system was then sealed and heated at 100 °C in an oil bath. After 18 hours at 100°C, full imine reduction was observed and  $\text{PhCH}_2\text{N}(\text{Ph})\text{SiPhMe}_2$  was found as the main product (NMR yield = 76% based on the relative integral of the benzylic protons of the product).  $^1\text{H}$  NMR (400 MHz,  $\text{CHCl}_3$ ):  $\delta$  4.67 (s, 2H,  $-\text{CH}_2-$ ), 0.52 (s, 6H,  $-\text{SiMe}_2$ ) ppm.  $^{29}\text{Si}\{^1\text{H}\}$  NMR (79 MHz,  $\text{CH}_2\text{Cl}_2$ ):  $\delta$  1.22 ppm. The results are in agreements with those reported in the literature.<sup>15</sup>

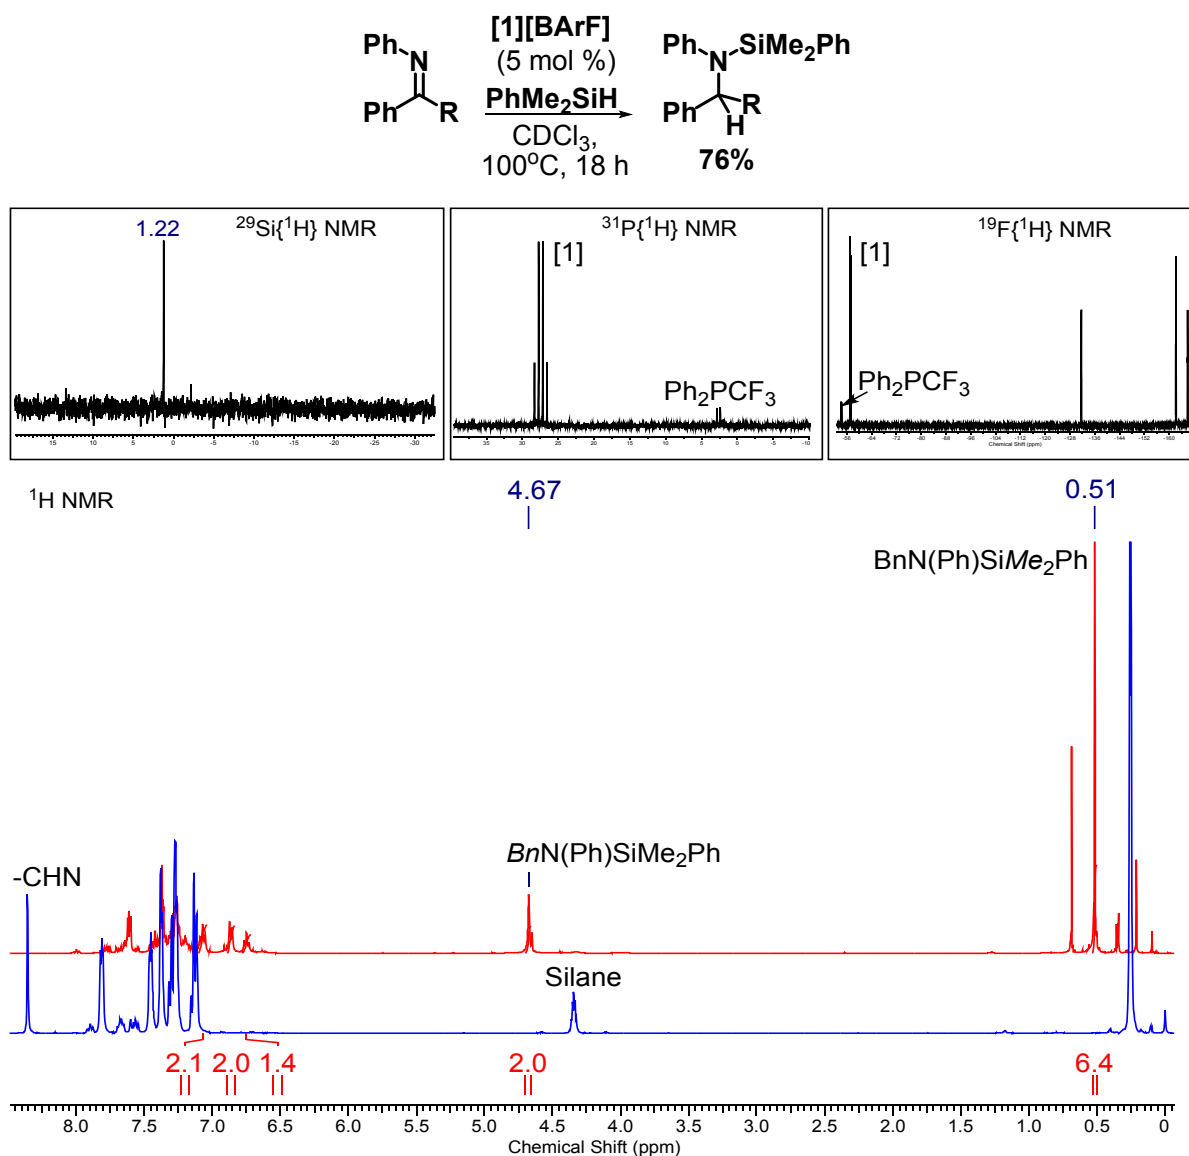

**Figure S42.**  $^1\text{H}$ ,  $^{29}\text{Si}\{^1\text{H}\}$ ,  $^{31}\text{P}\{^1\text{H}\}$  and  $^{19}\text{F}\{^1\text{H}\}$ -NMR spectra of the reduction of  $\text{PhC}(\text{H})\text{NPh}$  with  $\text{PhMe}_2\text{SiH}$  with **[1][BArF]** in dried  $\text{CHCl}_3$ . Blue (after 5 min), red (after 18 h at 100°C).

**Reaction under ambient conditions (PhC(H)NPh):** the reaction was repeated under ambient conditions using CDCl<sub>3</sub> straight from the Winchester. No decomposition was observed after 8 h at 100°C, with the imine completely consumed (NMR conversion PhCH<sub>2</sub>N(Ph)SiPhMe<sub>2</sub> 56%). Note: water may have caused hydrolysis of the silyl amine product to the NH congener.

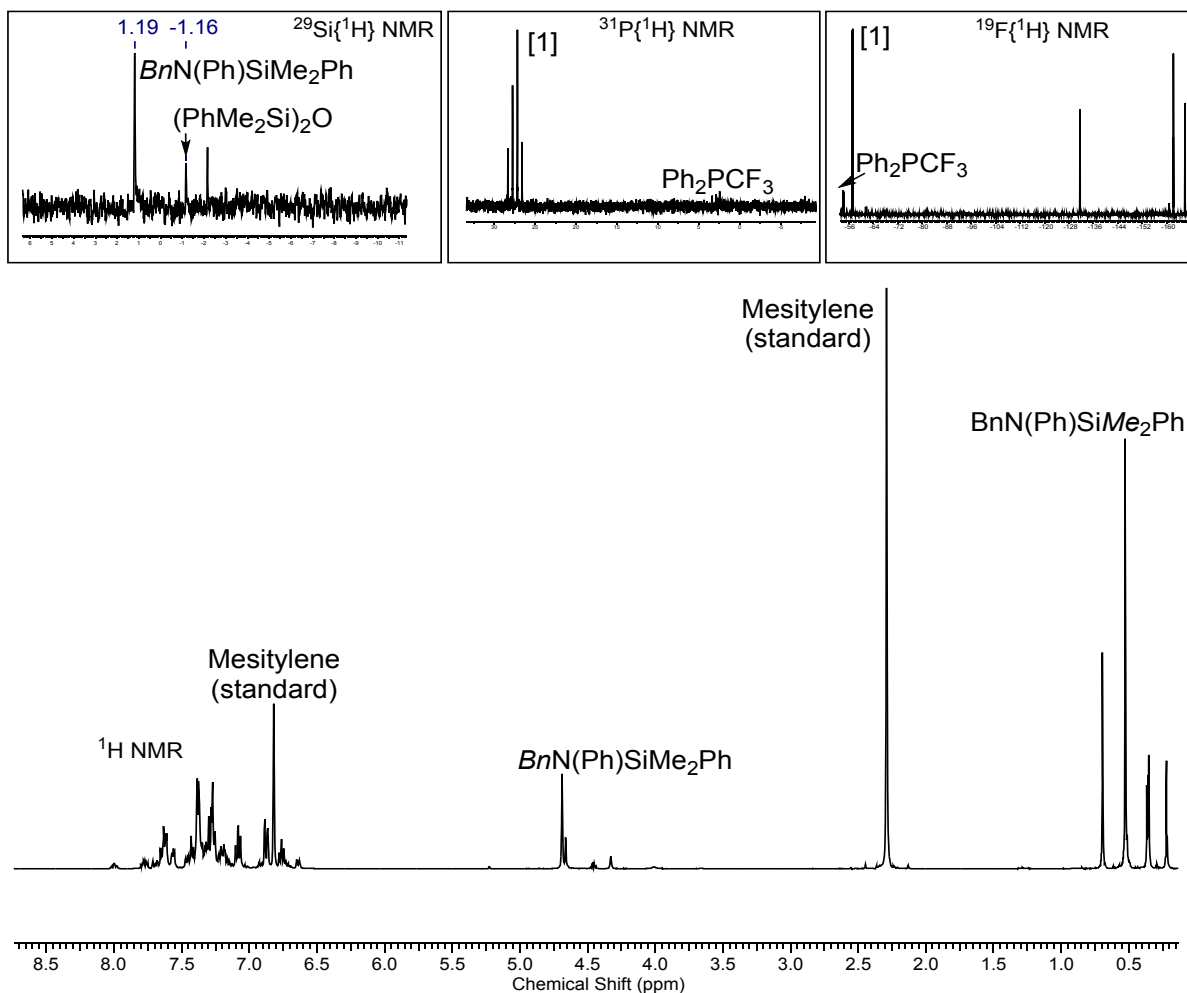

**Figure S43.** <sup>1</sup>H, <sup>29</sup>Si{<sup>1</sup>H}, <sup>31</sup>P{<sup>1</sup>H} and <sup>19</sup>F{<sup>1</sup>H}-NMR spectra of the reduction of PhC(H)NPh with PhMe<sub>2</sub>SiH with [1][BArF] in wet CDCl<sub>3</sub> under ambient conditions, after 8 h at 100°C.



## 10. H/D silane scrambling

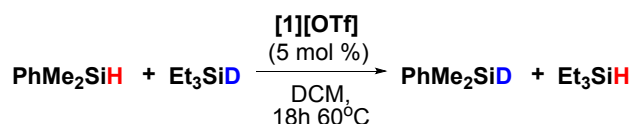

Under inert atmosphere, in a J. Young NMR tube **[1][OTf]** was dissolved in dried DCM (0.05 mL), followed by the addition of the fresh distilled PhMe<sub>2</sub>SiH (34 μL, 0.21 mmol, 1.0 eq.) and Et<sub>3</sub>SiD (35 μL, 0.21 mmol, 1.0 eq.). The system was then sealed and heated at 60°C in an oil bath for 18 hours, revealing formation of PhMe<sub>2</sub>SiD and Et<sub>3</sub>SiH, although at small extent (~ 6%).

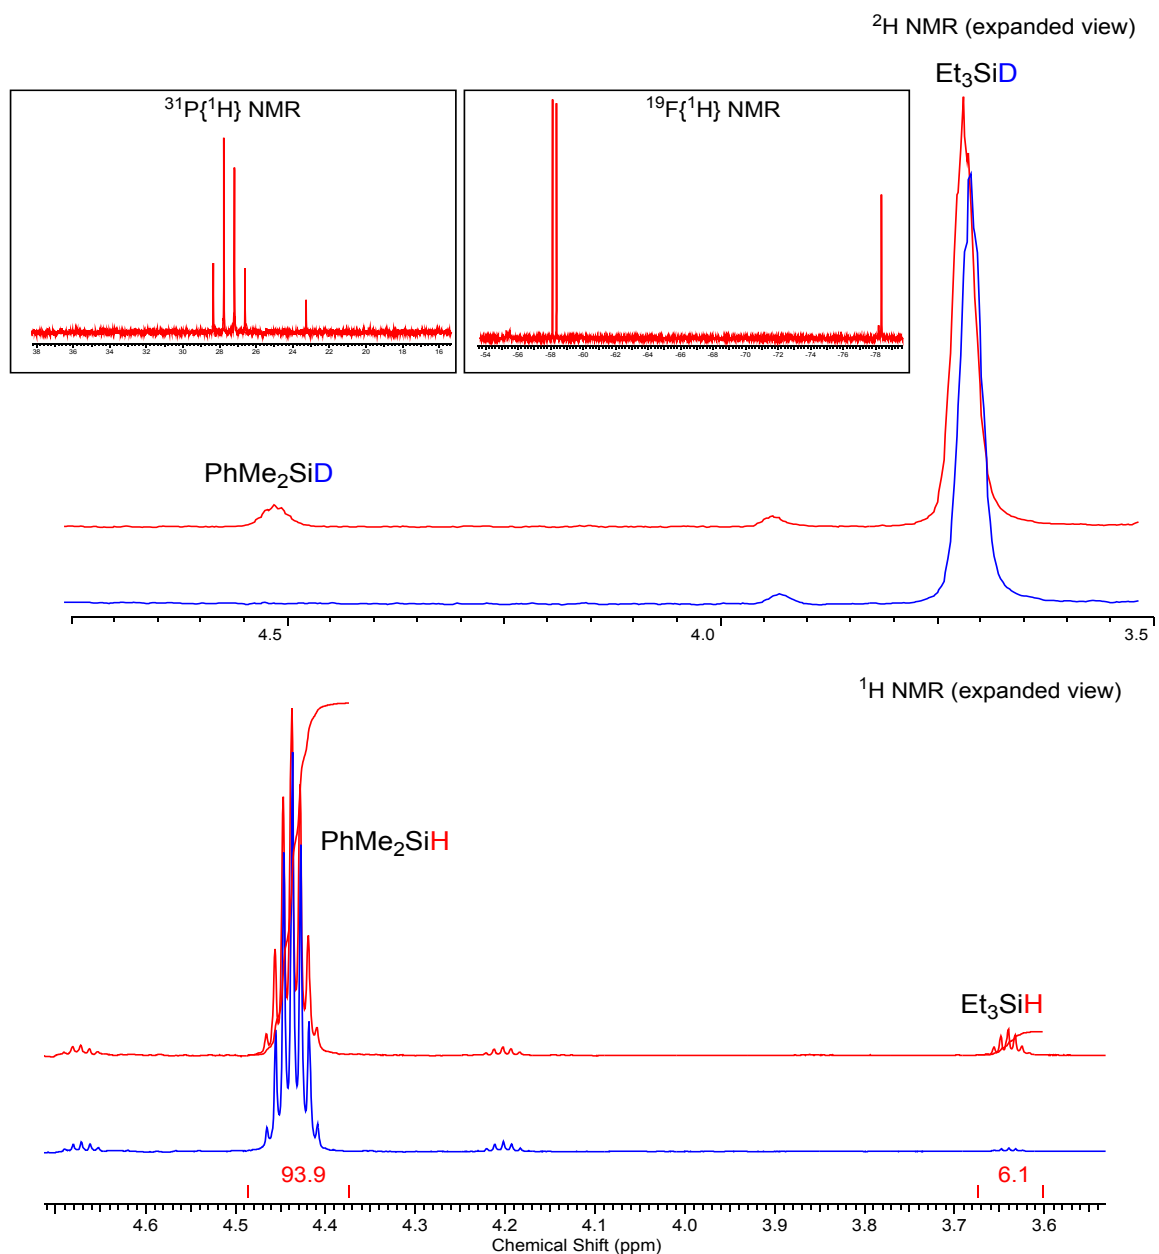

**Figure S44.** <sup>1</sup>H, <sup>2</sup>H, <sup>29</sup>Si{<sup>1</sup>H}, <sup>31</sup>P{<sup>1</sup>H} and <sup>19</sup>F{<sup>1</sup>H}-NMR spectra of the H/D silane scrambling with **[1][OTf]** in dried CH<sub>2</sub>Cl<sub>2</sub>. Blue (after 5 min), red (after 18 h at 60°C).

## 11. Mukaiyama aldol reaction

**General procedure:** under inert atmosphere, in a J. Young NMR tube the catalyst and 2-naphthaldehyde were dissolved in dried  $\text{CDCl}_3$  (0.05 mL), followed by the addition of the 1-methoxy-2-methyl-1-trimethylsilyloxypropene and toluene (32  $\mu\text{L}$ ) as internal standard. The system was then sealed, inverted for 19 hours at room temperature and subsequently analyzed by multinuclear NMR spectroscopy.

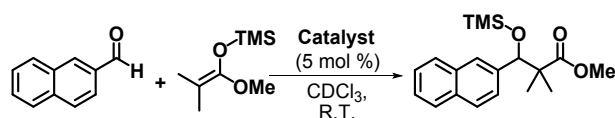

| Catalyst  | Time (h) | Conv. (%) |
|-----------|----------|-----------|
| [2][OTf]  | 19       | 99        |
| [1][OTf]  | 19       | 95        |
| [1][BArF] | 5        | 93        |

To avoid showing similar spectra multiple times, one example is reported.

**Entry 1:** 2-Naphthaldehyde (47 mg, 0.30 mmol, 1.0 eq.), 1-methoxy-2-methyl-1-trimethylsilyloxypropene (73  $\mu\text{L}$ , 0.36 mmol, 1.2 eq.), [2][OTf] (6 mg, 0.02 mmol, 0.05 eq.). After 19 hours at R.T., the corresponding Mukaiyama aldol product was found as main product (NMR yield = 99%). Diagnostic peaks:  $^1\text{H}$  NMR (400 MHz,  $\text{CHCl}_2$ ):  $\delta$  5.18 (s, 1H, -C(H)-), 3.70 (s, 3H, -OMe), 1.21 (s, 3H, Me), 1.07 (s, 3H, Me'), 0.00 (s, 9H, -OTMS) ppm. The results are in agreements with those reported in the literature.<sup>16</sup>

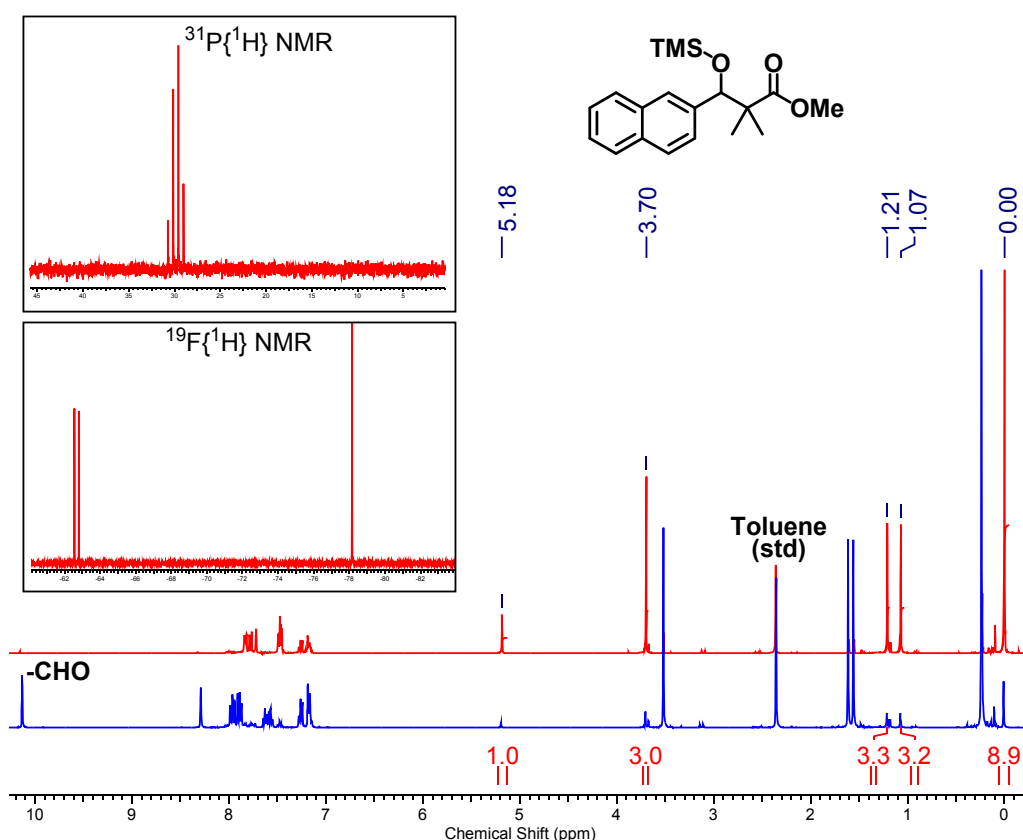

**Figure S45.**  $^1\text{H}$ ,  $^{31}\text{P}\{^1\text{H}\}$  and  $^{19}\text{F}\{^1\text{H}\}$ -NMR spectra of the Mukaiyama reaction with [2][OTf] in dried  $\text{CHCl}_3$ . Blue (after 20 min), red (after 19 h at R.T.).

## 12. Crystallographic analysis of [1][OTf], [1][BArF], [2][OTf]

Crystallographic data for compounds [1][OTf] and [2][OTf] were recorded on a Bruker X8 Prospector diffractometer, at 293 K with Cu K $\alpha$  radiation (mirror monochromator,  $\lambda = 1.54184$ ). Data for compound for [1][BArF] were recorded on a Bruker Apex2 X-ray diffractometer, at 150 K with Mo K $\alpha$  radiation (mirror monochromator,  $\lambda = 0.71073$ ). The CrysAlisPro<sup>17</sup> software package was used for data collection, cell refinement and data reduction. For all data sets the CrysAlisPro software package was used for empirical absorption corrections, which were applied using spherical harmonics, implemented in SCALE3 ABSPACK scaling algorithm. All further data processing was undertaken within the Olex2 software.<sup>18</sup> The structures were solved using the ShelXT<sup>19</sup> structure solution program using Intrinsic Phasing. All structures were refined with the SHELXL<sup>20</sup> refinement package using Least Squares minimisation against F<sup>2</sup>. Non-hydrogen atoms were refined anisotropically.

| Compound                                                  | [1][OTf]                                                         | [1][BArF]                                                     | [2][OTf]                                                         |
|-----------------------------------------------------------|------------------------------------------------------------------|---------------------------------------------------------------|------------------------------------------------------------------|
| <b>CCDC code</b>                                          | 1586279                                                          | 1586281                                                       | 1586280                                                          |
| <b>Empirical formula</b>                                  | C <sub>20</sub> H <sub>15</sub> F <sub>6</sub> O <sub>3</sub> PS | C <sub>43</sub> H <sub>15</sub> BF <sub>23</sub> P            | C <sub>15</sub> H <sub>13</sub> F <sub>6</sub> O <sub>3</sub> PS |
| <b>Formula weight</b>                                     | 480.35                                                           | 1010.33                                                       | 418.28                                                           |
| <b>Temperature / K</b>                                    | 293(2)                                                           | 150(2)                                                        | 293(2)                                                           |
| <b>Crystal system</b>                                     | orthorhombic                                                     | orthorhombic                                                  | triclinic                                                        |
| <b>Space group</b>                                        | Pbca                                                             | Pbca                                                          | P-1                                                              |
| <b>a / Å</b>                                              | 21.9081(6)                                                       | 14.9846(19)                                                   | 11.4013(6)                                                       |
| <b>b / Å</b>                                              | 8.3531(2)                                                        | 19.108(2)                                                     | 11.4161(6)                                                       |
| <b>c / Å</b>                                              | 22.4426(7)                                                       | 27.311(3)                                                     | 13.9435(7)                                                       |
| <b><math>\alpha</math> / °</b>                            | 90                                                               | 90                                                            | 81.712(4)                                                        |
| <b><math>\beta</math> / °</b>                             | 90                                                               | 90                                                            | 76.486(4)                                                        |
| <b><math>\gamma</math> / °</b>                            | 90                                                               | 90                                                            | 89.978(4)                                                        |
| <b>Volume / Å<sup>3</sup></b>                             | 4107.0(2)                                                        | 7819.9(16)                                                    | 1745.14(16)                                                      |
| <b>Z</b>                                                  | 8                                                                | 8                                                             | 4                                                                |
| <b><math>\rho_{\text{calc}}</math> gcm<sup>-3</sup></b>   | 1.554                                                            | 1.716                                                         | 1.592                                                            |
| <b>M / mm<sup>-1</sup></b>                                | 2.836                                                            | 0.215                                                         | 3.233                                                            |
| <b>F(000)</b>                                             | 1952.0                                                           | 4000.0                                                        | 848.0                                                            |
| <b>Crystal size / mm<sup>3</sup></b>                      | 0.4 × 0.3 × 0.1                                                  | 0.1 × 0.1 × 0.1                                               | 0.3 × 0.2 × 0.2                                                  |
| <b>Radiation</b>                                          | CuK $\alpha$ ( $\lambda = 1.54184$ )                             | MoK $\alpha$ ( $\lambda = 0.71073$ )                          | CuK $\alpha$ ( $\lambda = 1.54184$ )                             |
| <b>2<math>\theta</math> range for data collection / °</b> | 7.878 to 148.53                                                  | 2.982 to 55.318                                               | 6.592 to 149.622                                                 |
| <b>Index ranges</b>                                       | -26 ≤ h ≤ 24, -9 ≤ k ≤ 9, -24 ≤ l ≤ 24                           | -19 ≤ h ≤ 19, -24 ≤ k ≤ 24, -35 ≤ l ≤ 35                      | -14 ≤ h ≤ 14, -14 ≤ k ≤ 14, -17 ≤ l ≤ 15                         |
| <b>Reflections collected</b>                              | 17128                                                            | 127741                                                        | 18932                                                            |
| <b>Independent reflections</b>                            | 3836 [R <sub>int</sub> = 0.0425, R <sub>sigma</sub> = 0.0195]    | 9054 [R <sub>int</sub> = 0.0730, R <sub>sigma</sub> = 0.0388] | 6797 [R <sub>int</sub> = 0.0195, R <sub>sigma</sub> = 0.0164]    |
| <b>Data/restraints/parameters</b>                         | 3836/0/280                                                       | 9054/0/613                                                    | 6797/0/499                                                       |
| <b>Goodness-of-fit on F<sup>2</sup></b>                   | 1.062                                                            | 1.036                                                         | 1.064                                                            |
| <b>Final R indexes [I ≥ 2<math>\sigma</math> (I)]</b>     | R <sub>1</sub> = 0.0431, wR <sub>2</sub> = 0.1201                | R <sub>1</sub> = 0.0422, wR <sub>2</sub> = 0.1193             | R <sub>1</sub> = 0.0327, wR <sub>2</sub> = 0.0865                |
| <b>Final R indexes [all data]</b>                         | R <sub>1</sub> = 0.0447, wR <sub>2</sub> = 0.1219                | R <sub>1</sub> = 0.0881, wR <sub>2</sub> = 0.1612             | R <sub>1</sub> = 0.0339, wR <sub>2</sub> = 0.0874                |
| <b>Largest diff. peak/hole / e Å<sup>-3</sup></b>         | 0.52/-0.49                                                       | 0.41/-0.43                                                    | 0.35/-0.48                                                       |

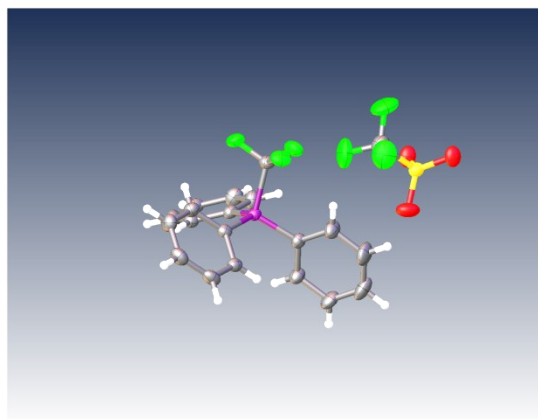

**Figure S46.** ORTEP representation of the molecular structure of compound **[1][OTf]**, with thermal ellipsoids set at the 50 % level.

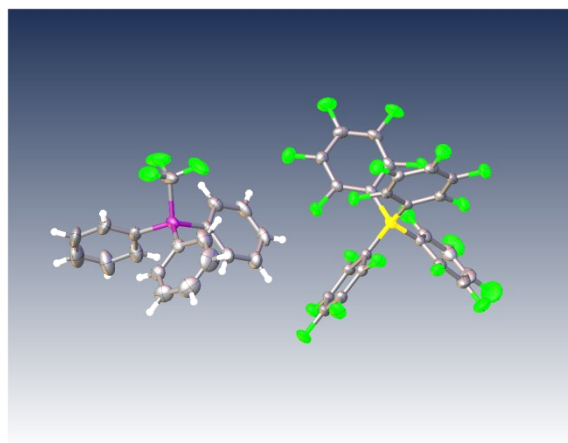

**Figure S47.** ORTEP representation of the molecular structure of compound **[1][BArF]**, with thermal ellipsoids set at the 50 % level.

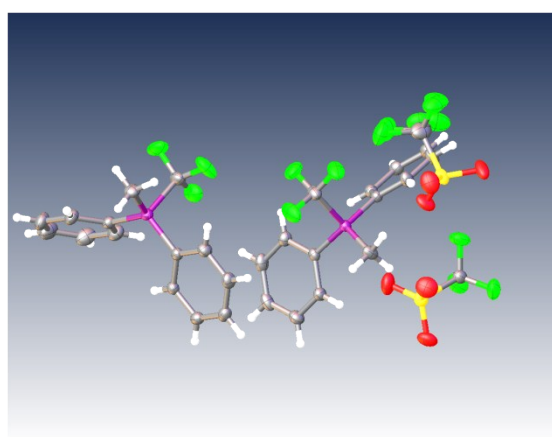

**Figure S48.** ORTEP representation of the molecular structure of compound **[2][OTf]**, with thermal ellipsoids set at the 50 % level. **[2][OTf]** displays disorder on one triflate anion.

## 13. References

- 1 C. B. Caputo, L. J. Hounjet, R. Dobrovetsky, D. W. Stephan, *Science*, 2013, **341**, 1374.
- 2 Z. Moussa, S. A. Ahmed, A. S. ElDouhaibi, S. Y. Al-Raqa, *Tetrahedron Lett.*, 2010, **51**, 1826.
- 3 P. Romanato, S. Duttwyler, A. Linden, K. K. Baldrige, J. S. Siegel, *J. Am. Chem. Soc.*, 2010, **132**, 7828.
- 4 T. Umemoto, S. Ishihara, *J. Am. Chem. Soc.*, 1993, **115**, 2156.
- 5 C. B. Caputo, D. Winkelhaus, R. Dobrovetsky, L. J. Hounjet, D. W. Stephan, *Dalton Trans.*, 2015, **44**, 12256.
- 6 M. B. Murphy-Jolly, L. C. Lewis, A. J. M. Caffyn, *Chem. Commun.*, 2005, 4479.
- 7 N. Nebra, V. V. Grushin, *J. Am. Chem. Soc.*, 2014, **136**, 16998.
- 8 Gaussian 09, Revision C1, Frisch, M. J.; Trucks, G. W.; Schlegel, H. B.; Scuseria, G. E.; Robb, M. A.; Cheeseman, J. R.; Scalmani, G.; Barone, V.; Mennucci, B.; Petersson, G. A.; Nakatsuji, H.; Caricato, M.; Li, X.; Hratchian, H. P.; Izmaylov, A. F.; Bloino, J.; Zheng, G.; Sonnenberg, J. L.; Hada, M.; Ehara, M.; Toyota, K.; Fukuda, R.; Hasegawa, J.; Ishida, M.; Nakajima, T.; Honda, Y.; Kitao, O.; Nakai, H.; Vreven, T.; Montgomery, Jr., J. A.; Peralta, J. E.; Ogliaro, F.; Bearpark, M.; Heyd, J. J.; Brothers, E.; Kudin, K. N.; Staroverov, V. N.; Kobayashi, R.; Normand, J.; Raghavachari, K.; Rendell, A.; Burant, J. C.; Iyengar, S. S.; Tomasi, J.; Cossi, M.; Rega, N.; Millam, J. M.; Klene, M.; Knox, J. E.; Cross, J. B.; Bakken, V.; Adamo, C.; Jaramillo, J.; Gomperts, R.; Stratmann, R. E.; Yazyev, O.; Austin, A. J.; Cammi, R.; Pomelli, C.; Ochterski, J. W.; Martin, R. L.; Morokuma, K.; Zakrzewski, V. G.; Voth, G. A.; Salvador, P.; Dannenberg, J. J.; Dapprich, S.; Daniels, A. D.; Farkas, Ö.; Foresman, J. B.; Ortiz, J. V.; Cioslowski, J.; Fox, D. J. Gaussian, Inc., Wallingford CT, 2009.
- 9 <http://comp.chem.umn.edu/info/DFT.htm>.
- 10 E. R. Clark and M. J. Ingleson, *Angew. Chem. Int. Ed.*, 2014, **53**, 11306.
- 11 E. R. Clark, A. Del Grosso and M. J. Ingleson, *Chem. Eur. J.*, 2013, **19**, 2462.
- 12 (a) V. Fasano, J. E. Radcliffe, L. D. Curless, M. J. Ingleson, *Chem. Eur. J.* 2017, **23**, 187.  
(b) B. Chatterjee, C. Gunanathan, *Chem. Commun.*, 2014, **50**, 888.
- 13 T. A. Boebel, J. F. Hartwig, *J. Am. Chem. Soc.*, 2008, **130**, 7534.
- 14 For selectivity in ketone reductions see: M. Mehta, M. H. Holthausen, I. Mallov, M. Pérez, Z.-W. Qu, S. Grimme, D. W. Stephan, *Angew. Chem. Int. Ed.*, 2015, **54**, 8250.
- 15 D. V. Gutsulyak, A. van der Est, G. I. Nikonov, *Angew. Chem. Int. Ed.*, 2011, **50**, 1384.
- 16 A. G. Barrado, J. M. Bayne, T. C. Johnstone, C. W. Lehmann, D. W. Stephan, M. Alcarazo, *Dalton Trans.* 2017, DOI: 10.1039/c7dt03197a
- 17 CrysAlisPro, Agil. Technol. Version 1.1 71.35.19 (release 27-10-2011 CrysAlis171.NET) (compiled Oct 27 2011,150211)
- 18 O. V. Dolomanov, L. J. Bourhis, R. J. Gildea, J. A. K. Howard and H. Puschmann, *J. Appl. Crystallogr.* 2009, **42**, 339.
- 19 G. M. Sheldrick, *Acta Cryst.* 2015, **A71**, 3.
- 20 G. M. Sheldrick, *Acta Cryst.* 2015, **C71**, 3.
